# Supplementary material for: Environmental inactivation and irrigation-mediated regrowth of Escherichia coli O157:H7 on romaine lettuce when inoculated in a fecal slurry matrix
Source: PeerJ. 2019 Mar 8;7:e6591. doi: 10.7717/peerj.6591 (PMC6410689; doi:10.7717/peerj.6591)
Supplement: Supplemental Information 1 — First Tab = codebook. Second Tab = raw data. Third Tab = Cimis weather data. Fourth Tab = Leaf wetness by collection event. Fifth Tab = Leaf wetness by trial. [file peerj-07-6591-s001.xlsx]

## Sheet: Codebook
Variable		Explanation	Type
RawData	trial	0=July, 1=October	Dichotomous
	fecal	0=Pig, 1=Rabbit, 2=Chicken	Categorical
	daywet	24 hr average leaf wetness based on HOBO data	Continuous
	event	Sequential collection of lettuce	Categorical
	hour	time collect after inoculation	Continuous
	days	Days since inoculation	Continuous
	co	inoculation concentration (CFU)	Count
	ct	recovered concentration (MPN)	Count
	id	lettuce ID	Identifier
	hold	average time samples were held before processing	Continuous
	avespk	average distance from lettuce head to 4 closest sprinklers	Continuous
	irrigated	0=collected before mid-trial irrigation event, 1=collected after mid-trial irrigation event	Dichotomous
CIMIS Data	stnid	Station ID	Identifier
	date	Date of observation	Continuous
	hour	time of observation	Continuous
	jul	Julian Day	Continuous
	precip	rain	Continuous
	solrad	Solar Radiation	Continuous
	vapor	Vapor Pressure	Continuous
	airtemp	Air Temperature	Continuous
	hum	Humidity	Continuous
	dew	Dew Point	Continuous
	windspd	Wind Speed	Continuous
	winddir	Wind Direction	Continuous
	soiltemp	Soil Temperature	Continuous
	trial	0=July, 1=October	Dichotomous

## Sheet: RawData
trial	fecal	daywet	event	hour	days	co	ct	id	hold	avespk	irrigated
0	0	35.2338	1	0.25	0.0104167	37750000	23000000	75-1-5	8.25	732.79	0
0	0	35.2338	1	0.25	0.0104167	37750000	23000000	75-6-5	8.25	741.68	0
0	0	35.2338	1	0.25	0.0104167	37750000	340000000	73-1-5	8.25	754.38	0
0	0	35.2338	1	0.25	0.0104167	37750000	2300000000	73-6-5	8.25	770.89	0
0	0	35.2338	1	0.25	0.0104167	37750000	23000000	73-9-5	8.25		0
0	0	35.2338	1	0.25	0.0104167	37750000	340000000	73-12-5	8.25		0
0	0	35.2338	1	0.25	0.0104167	37750000	2300000000	75-7-5	8.25		0
0	0	49.0081	2	21	0.875	37750000	2300000000	77-4-4	4.5	686.435	0
0	0	49.0081	2	21	0.875	37750000	2300000000	79-3-4	4.5	700.405	0
0	0	49.0081	2	21	0.875	37750000	340000000	79-5-4	4.5	711.835	0
0	0	49.0081	2	21	0.875	37750000	2300000000	77-1-4	4.5	728.345	0
0	0	49.0081	2	21	0.875	37750000	2300000000	77-9-4	4.5		0
0	0	49.0081	2	21	0.875	37750000	2300000000	77-11-4	4.5		0
0	0	49.0081	2	21	0.875	37750000	340000000	79-9-4	4.5		0
0	0	49.0081	2	21	0.875	37750000	340000000	79-10-4	4.5		0
0	0	37.0046	3	44.75	1.86458	37750000	700000000	92-9-3	4.75	746.76	0
0	0	37.0046	3	44.75	1.86458	37750000	23000000	81-3-3	4.75	773.43	0
0	0	37.0046	3	44.75	1.86458	37750000	700	92-1-3	4.75	777.875	0
0	0	37.0046	3	44.75	1.86458	37750000	2300000000	92-12-3	4.75	787.4	0
0	0	37.0046	3	44.75	1.86458	37750000	23000000	92-6-3	4.75	788.67	0
0	0	37.0046	3	44.75	1.86458	37750000	23000000	81-6-3	4.75	792.48	0
0	0	37.0046	3	44.75	1.86458	37750000	700000000	81-7-3	4.75		0
0	0	37.0046	3	44.75	1.86458	37750000	340000000	81-12-3	4.75		0
0	0	52.0041	4	69.25	2.88542	37750000	23000000	96-4-2	7	678.18	0
0	0	52.0041	4	69.25	2.88542	37750000	340000000	96-11-2	7	687.705	0
0	0	52.0041	4	69.25	2.88542	37750000	23000000	96-1-2	7	732.155	0
0	0	52.0041	4	69.25	2.88542	37750000	23000000	94-12-2	7	737.235	0
0	0	52.0041	4	69.25	2.88542	37750000	23000000	94-1-2	7	739.14	0
0	0	52.0041	4	69.25	2.88542	37750000	23000000	94-6-2	7	741.68	0
0	0	52.0041	4	69.25	2.88542	37750000	23000000	94-7-2	7	760.73	0
0	0	50.3246	5	92.75	3.86458	37750000	23000000	98-3-1	4.92	685.8	0
0	0	50.3246	5	92.75	3.86458	37750000	230000	98-10-1	4.92	686.435	0
0	0	50.3246	5	92.75	3.86458	37750000	340000000	98-9-1	4.92	693.42	0
0	0	50.3246	5	92.75	3.86458	37750000	23000000	98-5-1	4.92	697.865	0
0	0	50.3246	5	92.75	3.86458	37750000	23000000	100-4-1	4.92	721.36	0
0	0	50.3246	5	92.75	3.86458	37750000	34000	100-11-1	4.92	735.33	0
0	0	50.3246	5	92.75	3.86458	37750000	23000000	100-2-1	4.92	739.775	0
0	0	50.3246	5	92.75	3.86458	37750000	230000	100-7-1	4.92	797.56	0
0	0	50.3246	5	92.75	3.86458	37750000	230000	75-12-1	4.92		0
0	0	43.7812	6	115.75	4.82292	37750000	3400000	73-12-PR	12.75		0
0	0	43.7812	6	115.75	4.82292	37750000	2300000000	75-15-PR	12.75		0
0	0	43.7812	6	115.75	4.82292	37750000	3400000	79-6-PR	12.75		0
0	0	43.7812	6	115.75	4.82292	37750000	230000	79-14-PR	12.75		0
0	0	43.7812	6	115.75	4.82292	37750000	230000	94-15-PR	12.75		0
0	0	43.7812	6	115.75	4.82292	37750000	34000	96-9-PR	12.75		0
0	0	43.7812	6	115.75	4.82292	37750000	230000	96-12-PR	12.75		0
0	0	43.7812	6	115.75	4.82292	37750000	340000000	100-14-PR	12.75		0
0	0	23.2848	7	123	5.125	37750000	3400000	77-11-PO	5.5	690.245	1
0	0	23.2848	7	123	5.125	37750000	34000	96-7-PO	5.5	712.47	1
0	0	23.2848	7	123	5.125	37750000	3400000	73-7-PO	5.5	739.14	1
0	0	23.2848	7	123	5.125	37750000	3400000	77-1-PO	5.5	747.395	1
0	0	23.2848	7	123	5.125	37750000	230000	92-1-PO	5.5	748.665	1
0	0	23.2848	7	123	5.125	37750000	34000000000	92-11-PO	5.5	760.73	1
0	0	23.2848	7	123	5.125	37750000	23000000	98-16-PO	5.5	760.73	1
0	0	23.2848	7	123	5.125	37750000	340000000	81-16-PO	5.5	784.86	1
0	0	54	8	141.25	5.88542	37750000	23000000	98-13-1-po	6.25	690.88	1
0	0	54	8	141.25	5.88542	37750000	11000000	96-14-1-po	6.25	692.785	1
0	0	54	8	141.25	5.88542	37750000	3400000	73-14-1-po	6.25	732.155	1
0	0	54	8	141.25	5.88542	37750000	3400000	81-13-1-po	6.25	749.3	1
0	0	54	8	141.25	5.88542	37750000	110000000000	79-11-1-po	6.25	755.65	1
0	0	54	8	141.25	5.88542	37750000	3400000	92-8-1-po	6.25	794.385	1
0	0	51.9059	9	165.25	6.88542	37750000	230000	98-12-2-po	5.25	685.165	1
0	0	51.9059	9	165.25	6.88542	37750000	7000000	75-7-2-po	5.25	697.23	1
0	0	51.9059	9	165.25	6.88542	37750000	3400000	94-7-2-po	5.25	714.375	1
0	0	51.9059	9	165.25	6.88542	37750000	3400000	81-12-2-po	5.25	751.205	1
0	0	51.9059	9	165.25	6.88542	37750000	230000	77-9-2-po	5.25	758.19	1
0	0	51.9059	9	165.25	6.88542	37750000	230000	96-16-2-po	5.25	763.27	1
0	0	51.9059	9	165.25	6.88542	37750000	230000	73-16-2-po	5.25	767.08	1
0	0	51.9059	9	165.25	6.88542	37750000	230000	92-9-2-po	5.25	810.26	1
0	0	44.4308	10	189	7.875	37750000	34000	75-5-3-po	6.5	688.975	1
0	0	44.4308	10	189	7.875	37750000	230000	94-5-3-po	6.5	701.04	1
0	0	44.4308	10	189	7.875	37750000	230000	98-10-3-po	6.5	718.82	1
0	0	44.4308	10	189	7.875	37750000	3400000	75-11-3-po	6.5	733.425	1
0	0	44.4308	10	189	7.875	37750000	34000	94-11-3-po	6.5	741.68	1
0	0	44.4308	10	189	7.875	37750000	34000	79-9-3-po	6.5	747.395	1
0	0	44.4308	10	189	7.875	37750000	3400000	81-10-3-po	6.5	771.525	1
0	0	44.4308	10	189	7.875	37750000	230000	100-9-3-po	6.5	814.07	1
0	0	43.2297	11	213	8.875	37750000	34000	96-5-4-po	6.5	675.64	1
0	0	43.2297	11	213	8.875	37750000	7000000	75-13-4-po	6.5	698.5	1
0	0	43.2297	11	213	8.875	37750000	3400000	79-13-4-po	6.5	704.215	1
0	0	43.2297	11	213	8.875	37750000	230000	94-13-4-po	6.5	706.755	1
0	0	43.2297	11	213	8.875	37750000	230000	100-13-4-po	6.5	713.105	1
0	0	43.2297	11	213	8.875	37750000	34000	73-5-4-po	6.5	722.63	1
0	0	43.2297	11	213	8.875	37750000	230000	98-1-4-po	6.5	732.79	1
0	0	43.2297	11	213	8.875	37750000	2300	81-1-4-po	6.5	796.29	1
0	0	47.3777	12	234.75	9.78125	37750000	230000	77-4-5-po	8.75	681.355	1
0	0	47.3777	12	234.75	9.78125	37750000	2300	96-15-5-po	8.75	716.915	1
0	0	47.3777	12	234.75	9.78125	37750000	2300	100-17-5-po	8.75	721.36	1
0	0	47.3777	12	234.75	9.78125	37750000	34000	79-12-5-po	8.75	721.995	1
0	0	47.3777	12	234.75	9.78125	37750000	2300	100-12-5-po	8.75	725.17	1
0	0	47.3777	12	234.75	9.78125	37750000	230000	79-17-5-po	8.75	732.155	1
0	0	47.3777	12	234.75	9.78125	37750000	2300	73-15-5-po	8.75	736.6	1
0	1	35.2338	1	0.25	0.0104167	37600000	340000000	75-4-5	8.25	685.8	0
0	1	35.2338	1	0.25	0.0104167	37600000	23000000	75-3-5	8.25	692.15	0
0	1	35.2338	1	0.25	0.0104167	37600000	340000000	73-2-5	8.25	721.36	0
0	1	35.2338	1	0.25	0.0104167	37600000	2300000000	73-5-5	8.25	736.6	0
0	1	35.2338	1	0.25	0.0104167	37600000	23000000	73-8-5	8.25		0
0	1	35.2338	1	0.25	0.0104167	37600000	340000000	73-11-5	8.25		0
0	1	35.2338	1	0.25	0.0104167	37600000	23000000	75-9-5	8.25		0
0	1	35.2338	1	0.25	0.0104167	37600000	2300000000	75-11-5	8.25		0
0	1	49.0081	2	21	0.875	37600000	340000000	77-3-4	4.5	682.625	0
0	1	49.0081	2	21	0.875	37600000	340000000	79-6-4	4.5	739.14	0
0	1	49.0081	2	21	0.875	37600000	2300000000	79-1-4	4.5	746.125	0
0	1	49.0081	2	21	0.875	37600000	23000000	77-6-4	4.5	756.92	0
0	1	49.0081	2	21	0.875	37600000	700000000	77-7-4	4.5		0
0	1	49.0081	2	21	0.875	37600000	230000	77-12-4	4.5		0
0	1	49.0081	2	21	0.875	37600000	23000000	79-7-4	4.5		0
0	1	49.0081	2	21	0.875	37600000	23000000	79-12-4	4.5		0
0	1	37.0046	3	44.75	1.86458	37600000	3400000	92-11-3	4.75	752.475	0
0	1	37.0046	3	44.75	1.86458	37600000	3400000	92-5-3	4.75	755.015	0
0	1	37.0046	3	44.75	1.86458	37600000	23000000	81-2-3	4.75	769.62	0
0	1	37.0046	3	44.75	1.86458	37600000	3400000	92-2-3	4.75	775.97	0
0	1	37.0046	3	44.75	1.86458	37600000	2300000000	92-8-3	4.75	780.415	0
0	1	37.0046	3	44.75	1.86458	37600000	23000000	81-5-3	4.75	783.59	0
0	1	37.0046	3	44.75	1.86458	37600000	23000000	81-9-3	4.75		0
0	1	37.0046	3	44.75	1.86458	37600000	23000000	81-11-3	4.75		0
0	1	52.0041	4	69.25	2.88542	37600000	23000000	96-3-2	7	675.64	0
0	1	52.0041	4	69.25	2.88542	37600000	3400000	94-4-2	7	692.15	0
0	1	52.0041	4	69.25	2.88542	37600000	340000000	94-3-2	7	699.77	0
0	1	52.0041	4	69.25	2.88542	37600000	23000000	94-9-2	7	701.675	0
0	1	52.0041	4	69.25	2.88542	37600000	23000000	94-11-2	7	721.36	0
0	1	52.0041	4	69.25	2.88542	37600000	3400000	96-7-2	7	736.6	0
0	1	52.0041	4	69.25	2.88542	37600000	23000000	96-6-2	7	737.235	0
0	1	52.0041	4	69.25	2.88542	37600000	230000	96-12-2	7	739.775	0
0	1	50.3246	5	92.75	3.86458	37600000	230000	98-6-1	4.92	720.09	0
0	1	50.3246	5	92.75	3.86458	37600000	230000	98-12-1	4.92	722.63	0
0	1	50.3246	5	92.75	3.86458	37600000	3400000	100-10-1	4.92	723.265	0
0	1	50.3246	5	92.75	3.86458	37600000	230000	100-3-1	4.92	728.345	0
0	1	50.3246	5	92.75	3.86458	37600000	230000	100-8-1	4.92	744.22	0
0	1	50.3246	5	92.75	3.86458	37600000	3400000	100-6-1	4.92	747.395	0
0	1	50.3246	5	92.75	3.86458	37600000	230000	98-1-1	4.92	750.57	0
0	1	50.3246	5	92.75	3.86458	37600000	230000	98-7-1	4.92	767.715	0
0	1	43.7812	6	115.75	4.82292	37600000	23000000	73-10-PR	12.75		0
0	1	43.7812	6	115.75	4.82292	37600000	3400000	75-4-PR	12.75		0
0	1	43.7812	6	115.75	4.82292	37600000	230000	75-9-PR	12.75		0
0	1	43.7812	6	115.75	4.82292	37600000	3400000	79-2-PR	12.75		0
0	1	43.7812	6	115.75	4.82292	37600000	3400000	81-4-PR	12.75		0
0	1	43.7812	6	115.75	4.82292	37600000	23000000	94-4-PR	12.75		0
0	1	43.7812	6	115.75	4.82292	37600000	23000000	94-9-PR	12.75		0
0	1	43.7812	6	115.75	4.82292	37600000	230000	96-10-PR	12.75		0
0	1	43.7812	6	115.75	4.82292	37600000	34000	98-4-PR	12.75		0
0	1	43.7812	6	115.75	4.82292	37600000	230000	100-2-PR	12.75		0
0	1	23.2848	7	123	5.125	37600000	230000	75-16-PO	5.5	690.245	1
0	1	23.2848	7	123	5.125	37600000	230000	98-6-PO	5.5	699.77	1
0	1	23.2848	7	123	5.125	37600000	230000	94-16-PO	5.5	704.85	1
0	1	23.2848	7	123	5.125	37600000	230000	77-16-PO	5.5	739.14	1
0	1	23.2848	7	123	5.125	37600000	700000000	81-6-PO	5.5	748.03	1
0	1	23.2848	7	123	5.125	37600000	23000000	92-16-PO	5.5	798.195	1
0	1	54	8	141.25	5.88542	37600000	230000000000	77-5-1-po	6.25	678.815	1
0	1	54	8	141.25	5.88542	37600000	7000000	77-14-1-po	6.25	688.975	1
0	1	54	8	141.25	5.88542	37600000	34000000000	98-3-1-po	6.25	691.515	1
0	1	54	8	141.25	5.88542	37600000	34000000000	94-1-1-po	6.25	742.315	1
0	1	54	8	141.25	5.88542	37600000	34000000000	75-1-1-po	6.25	745.49	1
0	1	54	8	141.25	5.88542	37600000	495000000	92-5-1-po	6.25	752.475	1
0	1	54	8	141.25	5.88542	37600000	700000000	92-14-1-po	6.25	765.175	1
0	1	54	8	141.25	5.88542	37600000	340000000	81-3-1-po	6.25	769.62	1
0	1	51.9059	9	165.25	6.88542	37600000	3400000	75-18-2-po	5.25	725.805	1
0	1	51.9059	9	165.25	6.88542	37600000	3400000	79-18-2-po	5.25	743.585	1
0	1	51.9059	9	165.25	6.88542	37600000	23000000	94-18-2-po	5.25	746.125	1
0	1	51.9059	9	165.25	6.88542	37600000	230000	96-8-2-po	5.25	746.76	1
0	1	51.9059	9	165.25	6.88542	37600000	230000	100-18-2-po	5.25	755.65	1
0	1	51.9059	9	165.25	6.88542	37600000	23000000	100-10-2-po	5.25	767.08	1
0	1	51.9059	9	165.25	6.88542	37600000	34000	73-8-2-po	5.25	772.795	1
0	1	51.9059	9	165.25	6.88542	37600000	34000	79-10-2-po	5.25	775.335	1
0	1	44.4308	10	189	7.875	37600000	3400000	100-4-3-po	6.5	709.295	1
0	1	44.4308	10	189	7.875	37600000	230000	79-4-3-po	6.5	709.93	1
0	1	44.4308	10	189	7.875	37600000	230000	98-15-3-po	6.5	728.345	1
0	1	44.4308	10	189	7.875	37600000	230000	96-1-3-po	6.5	735.965	1
0	1	44.4308	10	189	7.875	37600000	3400000	75-10-3-po	6.5	763.27	1
0	1	44.4308	10	189	7.875	37600000	34000	94-10-3-po	6.5	768.985	1
0	1	44.4308	10	189	7.875	37600000	34000	81-15-3-po	6.5	776.605	1
0	1	44.4308	10	189	7.875	37600000	230000	73-1-3-po	6.5	788.035	1
0	1	43.2297	11	213	8.875	37600000	3400000	79-5-4-po	6.5	691.515	1
0	1	43.2297	11	213	8.875	37600000	3400000	100-5-4-po	6.5	699.77	1
0	1	43.2297	11	213	8.875	37600000	34000	75-3-4-po	6.5	704.215	1
0	1	43.2297	11	213	8.875	37600000	3400000	77-7-4-po	6.5	704.85	1
0	1	43.2297	11	213	8.875	37600000	230000	94-3-4-po	6.5	713.105	1
0	1	43.2297	11	213	8.875	37600000	230000	79-16-4-po	6.5	714.375	1
0	1	43.2297	11	213	8.875	37600000	34000	100-16-4-po	6.5	716.28	1
0	1	43.2297	11	213	8.875	37600000	3400000	92-7-4-po	6.5	765.81	1
0	1	47.3777	12	234.75	9.78125	37600000	34000	96-4-5-po	8.75	676.91	1
0	1	47.3777	12	234.75	9.78125	37600000	2300	100-7-5-po	8.75	701.675	1
0	1	47.3777	12	234.75	9.78125	37600000	2300	79-7-5-po	8.75	702.31	1
0	1	47.3777	12	234.75	9.78125	37600000	34000	75-17-5-po	8.75	719.455	1
0	1	47.3777	12	234.75	9.78125	37600000	230000	94-17-5-po	8.75	725.17	1
0	1	47.3777	12	234.75	9.78125	37600000	230000	73-4-5-po	8.75	734.06	1
0	1	47.3777	12	234.75	9.78125	37600000	34000	98-9-5-po	8.75	757.555	1
0	1	47.3777	12	234.75	9.78125	37600000	34000	81-9-5-po	8.75	808.99	1
0	2	35.2338	1	0.25	0.0104167	41700000	23000000	75-2-5	8.25	702.31	0
0	2	35.2338	1	0.25	0.0104167	41700000	340000000	75-5-5	8.25	708.66	0
0	2	35.2338	1	0.25	0.0104167	41700000	23000000	73-3-5	8.25	721.36	0
0	2	35.2338	1	0.25	0.0104167	41700000	23000000	73-4-5	8.25	731.52	0
0	2	35.2338	1	0.25	0.0104167	41700000	340000000	73-7-5	8.25		0
0	2	35.2338	1	0.25	0.0104167	41700000	23000000	75-8-5	8.25		0
0	2	35.2338	1	0.25	0.0104167	41700000	340000000	75-10-5	8.25		0
0	2	49.0081	2	21	0.875	41700000	2300000000	77-2-4	4.5	695.96	0
0	2	49.0081	2	21	0.875	41700000	340000000	77-5-4	4.5	711.835	0
0	2	49.0081	2	21	0.875	41700000	340000000	77-8-4	4.5		0
0	2	49.0081	2	21	0.875	41700000	340000000	77-10-4	4.5		0
0	2	49.0081	2	21	0.875	41700000	23000000	79-8-4	4.5		0
0	2	49.0081	2	21	0.875	41700000	340000000	79-11-4	4.5		0
0	2	37.0046	3	44.75	1.86458	41700000	230000	92-3-3	4.75	746.76	0
0	2	37.0046	3	44.75	1.86458	41700000	340000000	92-10-3	4.75	757.555	0
0	2	37.0046	3	44.75	1.86458	41700000	340000000	81-4-3	4.75	761.365	0
0	2	37.0046	3	44.75	1.86458	41700000	23000000	92-4-3	4.75	767.08	0
0	2	37.0046	3	44.75	1.86458	41700000	23000000	81-1-3	4.75	793.115	0
0	2	37.0046	3	44.75	1.86458	41700000	23000000	81-8-3	4.75		0
0	2	37.0046	3	44.75	1.86458	41700000	2300000000	81-10-3	4.75		0
0	2	52.0041	4	69.25	2.88542	41700000	23000000	96-10-2	7	675.005	0
0	2	52.0041	4	69.25	2.88542	41700000	23000000	94-10-2	7	695.325	0
0	2	52.0041	4	69.25	2.88542	41700000	23000000	96-2-2	7	695.96	0
0	2	52.0041	4	69.25	2.88542	41700000	23000000	96-8-2	7	695.96	0
0	2	52.0041	4	69.25	2.88542	41700000	340000000	96-5-2	7	696.595	0
0	2	52.0041	4	69.25	2.88542	41700000	23000000	94-2-2	7	705.485	0
0	2	52.0041	4	69.25	2.88542	41700000	23000000	94-5-2	7	713.105	0
0	2	52.0041	4	69.25	2.88542	41700000	23000000	94-8-2	7	716.28	0
0	2	50.3246	5	92.75	3.86458	41700000	23000000	98-4-1	4.92	683.895	0
0	2	50.3246	5	92.75	3.86458	41700000	3400000	98-11-1	4.92	694.69	0
0	2	50.3246	5	92.75	3.86458	41700000	3400000	98-2-1	4.92	717.55	0
0	2	50.3246	5	92.75	3.86458	41700000	23000000	98-8-1	4.92	721.995	0
0	2	50.3246	5	92.75	3.86458	41700000	230000	100-5-1	4.92	737.235	0
0	2	50.3246	5	92.75	3.86458	41700000	230000	100-9-1	4.92	739.14	0
0	2	50.3246	5	92.75	3.86458	41700000	230000	100-12-1	4.92	744.855	0
0	2	50.3246	5	92.75	3.86458	41700000	3400000	100-1-1	4.92	775.335	0
0	2	50.3246	5	93.25	3.88542	41700000	3400000	73-10-1	4.92		0
0	2	43.7812	6	115.75	4.82292	41700000	3400000	77-2-PR	12.75		0
0	2	43.7812	6	115.75	4.82292	41700000	3400000	79-1-PR	12.75		0
0	2	43.7812	6	115.75	4.82292	41700000	23000000	81-5-PR	12.75		0
0	2	43.7812	6	115.75	4.82292	41700000	230000	92-2-PR	12.75		0
0	2	43.7812	6	115.75	4.82292	41700000	230000	96-3-PR	12.75		0
0	2	43.7812	6	115.75	4.82292	41700000	23000000	98-5-PR	12.75		0
0	2	43.7812	6	115.75	4.82292	41700000	230000	100-1-PR	12.75		0
0	2	23.2848	7	123	5.125	41700000	23000000	77-12-PO	5.5	677.545	1
0	2	23.2848	7	123	5.125	41700000	3400000	77-6-PO	5.5	685.165	1
0	2	23.2848	7	123	5.125	41700000	3400000	100-15-PO	5.5	700.405	1
0	2	23.2848	7	123	5.125	41700000	23000000	79-15-PO	5.5	701.04	1
0	2	23.2848	7	123	5.125	41700000	230000	96-2-PO	5.5	707.39	1
0	2	23.2848	7	123	5.125	41700000	23000000	73-2-PO	5.5	755.015	1
0	2	23.2848	7	123	5.125	41700000	3400000	92-12-PO	5.5	764.54	1
0	2	23.2848	7	123	5.125	41700000	7000000	92-6-PO	5.5	767.715	1
0	2	54	8	141.25	5.88542	41700000	3400000	73-9-1-po	6.25	795.02	1
0	2	54	8	141.25	5.88542	41700000	23000000	100-3-1-po	6.25	706.755	1
0	2	54	8	141.25	5.88542	41700000	23000000	79-3-1-po	6.25	709.93	1
0	2	54	8	141.25	5.88542	41700000	23000000	75-8-1-po	6.25	715.01	1
0	2	54	8	141.25	5.88542	41700000	23000000	94-8-1-po	6.25	726.44	1
0	2	54	8	141.25	5.88542	41700000	340000000	98-8-1-po	6.25	763.905	1
0	2	54	8	141.25	5.88542	41700000	23000000	81-8-1-po	6.25	784.86	1
0	2	51.9059	9	165.25	6.88542	41700000	34000	96-13-2-po	5.25	679.45	1
0	2	51.9059	9	165.25	6.88542	41700000	230000	77-3-2-po	5.25	694.055	1
0	2	51.9059	9	165.25	6.88542	41700000	23000000	98-2-2-po	5.25	704.85	1
0	2	51.9059	9	165.25	6.88542	41700000	3400000	73-13-2-po	5.25	719.455	1
0	2	51.9059	9	165.25	6.88542	41700000	230000	92-3-2-po	5.25	726.44	1
0	2	51.9059	9	165.25	6.88542	41700000	230000	92-15-2-po	5.25	765.81	1
0	2	51.9059	9	165.25	6.88542	41700000	340000000	81-2-2-po	5.25	767.715	1
0	2	44.4308	10	189	7.875	41700000	34000	96-11-3-po	6.5	690.88	1
0	2	44.4308	10	189	7.875	41700000	34000	98-11-3-po	6.5	698.5	1
0	2	44.4308	10	189	7.875	41700000	230000	75-12-3-po	6.5	701.675	1
0	2	44.4308	10	189	7.875	41700000	2300	94-12-3-po	6.5	714.375	1
0	2	44.4308	10	189	7.875	41700000	230000	77-10-3-po	6.5	718.82	1
0	2	44.4308	10	189	7.875	41700000	230000	73-11-3-po	6.5	730.885	1
0	2	44.4308	10	189	7.875	41700000	230000	81-11-3-po	6.5	767.715	1
0	2	44.4308	10	189	7.875	41700000	34000	92-10-3-po	6.5	784.86	1
0	2	43.2297	11	213	8.875	41700000	230000	77-13-4-po	6.5	676.91	1
0	2	43.2297	11	213	8.875	41700000	230000	75-6-4-po	6.5	686.435	1
0	2	43.2297	11	213	8.875	41700000	230000	96-6-4-po	6.5	687.705	1
0	2	43.2297	11	213	8.875	41700000	230000	94-6-4-po	6.5	698.5	1
0	2	43.2297	11	213	8.875	41700000	34000	98-7-4-po	6.5	725.805	1
0	2	43.2297	11	213	8.875	41700000	34000	73-6-4-po	6.5	739.775	1
0	2	43.2297	11	213	8.875	41700000	230000	92-13-4-po	6.5	751.205	1
0	2	43.2297	11	213	8.875	41700000	230000	81-7-4-po	6.5	774.7	1
0	2	47.3777	12	234.75	9.78125	41700000	230000	75-14-5-po	8.75	683.26	1
0	2	47.3777	12	234.75	9.78125	41700000	230000	94-14-5-po	8.75	697.865	1
0	2	47.3777	12	234.75	9.78125	41700000	34000	98-14-5-po	8.75	701.675	1
0	2	47.3777	12	234.75	9.78125	41700000	2300	75-2-5-po	8.75	715.01	1
0	2	47.3777	12	234.75	9.78125	41700000	34000	94-2-5-po	8.75	715.01	1
0	2	47.3777	12	234.75	9.78125	41700000	230000	79-8-5-po	8.75	721.36	1
0	2	47.3777	12	234.75	9.78125	41700000	230000	100-8-5-po	8.75	727.71	1
0	2	47.3777	12	234.75	9.78125	41700000	230000	81-14-5-po	8.75	752.475	1
1	0	57.7882	1	0.75	0.03125	45550000	23000000	73-9-5	4.75	722.63	0
1	0	57.7882	1	0.75	0.03125	45550000	340000000	92-9-5	4.75	732.79	0
1	0	57.7882	1	0.75	0.03125	45550000	23000000	92-12-5	4.75	767.715	0
1	0	57.7882	1	0.75	0.03125	45550000	340000000	92-1-5	4.75	768.35	0
1	0	57.7882	1	0.75	0.03125	45550000	23000000	92-6-5	4.75	768.985	0
1	0	57.7882	1	0.75	0.03125	45550000	23000000	73-1-5	4.75	785.495	0
1	0	57.7882	1	0.75	0.03125	45550000	23000000	73-6-5	4.75	786.765	0
1	0	57.7882	1	0.75	0.03125	45550000	23000000	73-12-5	4.75	793.75	0
1	0	52.5284	2	22.5	0.9375	45550000	23000000	94-12-4	5.5	733.425	0
1	0	52.5284	2	22.5	0.9375	45550000	23000000	75-6-4	5.5	734.06	0
1	0	52.5284	2	22.5	0.9375	45550000	23000000	75-12-4	5.5	737.235	0
1	0	52.5284	2	22.5	0.9375	45550000	23000000	94-6-4	5.5	737.235	0
1	0	52.5284	2	22.5	0.9375	45550000	230000	94-1-4	5.5	749.3	0
1	0	52.5284	2	22.5	0.9375	45550000	23000000	75-7-4	5.5	754.38	0
1	0	52.5284	2	22.5	0.9375	45550000	340000000	75-1-4	5.5	765.175	0
1	0	52.5284	2	22.5	0.9375	45550000	23000000	94-7-4	5.5	777.875	0
1	0	14.5223	3	44.5	1.85417	45550000	3400000	96-4-3	5.5	684.53	0
1	0	14.5223	3	44.5	1.85417	45550000	230000	96-9-3	5.5	685.8	0
1	0	14.5223	3	44.5	1.85417	45550000	230000	77-11-3	5.5	701.675	0
1	0	14.5223	3	44.5	1.85417	45550000	230000	77-4-3	5.5	702.945	0
1	0	14.5223	3	44.5	1.85417	45550000	230000	96-11-3	5.5	703.58	0
1	0	14.5223	3	44.5	1.85417	45550000	230000	77-1-3	5.5	754.38	0
1	0	14.5223	3	44.5	1.85417	45550000	230000	96-1-3	5.5	759.46	0
1	0	48.8607	4	68.5	2.85417	45550000	230000	79-9-2	6.75	707.39	0
1	0	48.8607	4	68.5	2.85417	45550000	2300	79-10-2	6.75	708.025	0
1	0	48.8607	4	68.5	2.85417	45550000	230000	98-9-2	6.75	708.025	0
1	0	48.8607	4	68.5	2.85417	45550000	34000	98-10-2	6.75	709.295	0
1	0	48.8607	4	68.5	2.85417	45550000	230000	98-3-2	6.75	721.995	0
1	0	48.8607	4	68.5	2.85417	45550000	2300	98-5-2	6.75	721.995	0
1	0	48.8607	4	68.5	2.85417	45550000	230000	79-3-2	6.75	723.265	0
1	0	75.9925	5	93.75	3.90625	45550000	230000	100-4-1	5.25	757.555	0
1	0	75.9925	5	93.75	3.90625	45550000	230000	100-2-1	5.25	770.255	0
1	0	75.9925	5	93.75	3.90625	45550000	2300	100-11-1	5.25	772.795	0
1	0	75.9925	5	93.75	3.90625	45550000	230000	81-3-1	5.25	784.86	0
1	0	75.9925	5	93.75	3.90625	45550000	34000	81-12-1	5.25	796.29	0
1	0	75.9925	5	93.75	3.90625	45550000	34000	81-7-1	5.25	800.1	0
1	0	75.9925	5	93.75	3.90625	45550000	230000	81-6-1	5.25	807.72	0
1	0	75.9925	5	93.75	3.90625	45550000	34000	100-7-1	5.25	808.355	0
1	0	26.532	6	116	4.83333	45550000	230000	73-12-PR	9.5		0
1	0	26.532	6	116	4.83333	45550000	2300	75-15-PR	9.5		0
1	0	26.532	6	116	4.83333	45550000	230000	79-6-PR	9.5		0
1	0	26.532	6	116	4.83333	45550000	230000	79-14-PR	9.5		0
1	0	26.532	6	116	4.83333	45550000	230000	94-15-PR	9.5		0
1	0	26.532	6	116	4.83333	45550000	34000	96-12-PR	9.5		0
1	0	26.532	6	116	4.83333	45550000	34000	100-6-PR	9.5		0
1	0	26.532	6	116	4.83333	45550000	230000	100-14-PR	9.5		0
1	0	65.3385	7	119.5	4.97917	45550000	2300	77-11-PO	8	701.675	1
1	0	65.3385	7	119.5	4.97917	45550000	34000	96-7-PO	8	716.28	1
1	0	65.3385	7	119.5	4.97917	45550000	3400000	77-1-PO	8	737.87	1
1	0	65.3385	7	119.5	4.97917	45550000	230000	73-7-PO	8	742.315	1
1	0	65.3385	7	119.5	4.97917	45550000	230000	92-11-PO	8	744.855	1
1	0	65.3385	7	119.5	4.97917	45550000	230000	98-16-PO	8	755.015	1
1	0	65.3385	7	119.5	4.97917	45550000	3400000	81-16-PO	8	789.305	1
1	0	65.3385	7	119.5	4.97917	45550000	230000	92-1-PO	8	789.305	1
1	0	40.2579	8	142.25	5.92708	45550000	70000000000	96-14-1-po	7	694.055	1
1	0	40.2579	8	142.25	5.92708	45550000	230000	98-13-1-po	7	709.295	1
1	0	40.2579	8	142.25	5.92708	45550000	3400	73-14-1-po	7	730.885	1
1	0	40.2579	8	142.25	5.92708	45550000	34000	79-11-1-po	7	750.57	1
1	0	40.2579	8	142.25	5.92708	45550000	230000	77-8-1-po	7	753.745	1
1	0	40.2579	8	142.25	5.92708	45550000	3400000	81-13-1-po	7	768.35	1
1	0	40.2579	8	142.25	5.92708	45550000	34000	92-8-1-po	7	780.415	1
1	0	40.2579	8	142.25	5.92708	45550000	34000	100-11-1-po	7	781.05	1
1	0	58.3094	9	164.5	6.85417	45550000	230000	98-12-2-po	6	702.31	1
1	0	58.3094	9	164.5	6.85417	45550000	230000	75-7-2-po	6	703.58	1
1	0	58.3094	9	164.5	6.85417	45550000	230000	94-7-2-po	6	704.215	1
1	0	58.3094	9	164.5	6.85417	45550000	2300	96-16-2-po	6	755.65	1
1	0	58.3094	9	164.5	6.85417	45550000	230000	81-12-2-po	6	755.65	1
1	0	58.3094	9	164.5	6.85417	45550000	3400000	73-16-2-po	6	772.16	1
1	0	58.3094	9	164.5	6.85417	45550000	230000	77-9-2-po	6	777.875	1
1	0	58.3094	9	164.5	6.85417	45550000	34000	92-9-2-po	6	794.385	1
1	0	53.1801	10	188	7.83333	45550000	34000	75-5-3-po	6.25	694.055	1
1	0	53.1801	10	188	7.83333	45550000	34000	94-5-3-po	6.25	699.77	1
1	0	53.1801	10	188	7.83333	45550000	2300	94-11-3-po	6.25	733.425	1
1	0	53.1801	10	188	7.83333	45550000	34000	98-10-3-po	6.25	735.965	1
1	0	53.1801	10	188	7.83333	45550000	34000	75-11-3-po	6.25	749.3	1
1	0	53.1801	10	188	7.83333	45550000	3400	79-9-3-po	6.25	763.905	1
1	0	53.1801	10	188	7.83333	45550000	230000	100-9-3-po	6.25	875.03	1
1	0	30.7475	11	212.5	8.85417	45550000	2300	96-5-4-po	6	692.785	1
1	0	30.7475	11	212.5	8.85417	45550000	2300	94-13-4-po	6	697.23	1
1	0	30.7475	11	212.5	8.85417	45550000	230000	79-13-4-po	6	704.215	1
1	0	30.7475	11	212.5	8.85417	45550000	2300	75-13-4-po	6	706.755	1
1	0	30.7475	11	212.5	8.85417	45550000	2300	73-5-4-po	6	727.075	1
1	0	30.7475	11	212.5	8.85417	45550000	230000	100-13-4-po	6	738.505	1
1	0	30.7475	11	212.5	8.85417	45550000	230000	98-1-4-po	6	784.86	1
1	0	30.7475	11	212.5	8.85417	45550000	2300	81-1-4-po	6	805.815	1
1	0	48.8059	12	236	9.83333	45550000	2300	77-4-5-po	5.5	685.8	1
1	0	48.8059	12	236	9.83333	45550000	2300	96-15-5-po	5.5	718.185	1
1	0	48.8059	12	236	9.83333	45550000	34000	92-4-5-po	5.5	744.855	1
1	0	48.8059	12	236	9.83333	45550000	34000	73-15-5-po	5.5	745.49	1
1	0	48.8059	12	236	9.83333	45550000	34000	100-17-5-po	5.5	770.255	1
1	0	48.8059	12	236	9.83333	45550000	2300	100-12-5-po	5.5	775.97	1
1	0	48.8059	12	236	9.83333	45550000	2300	81-10-5-po	6.25	778.51	1
1	1	57.7882	1	0.75	0.03125	50000000	23000000	73-11-5	4.75	732.155	0
1	1	57.7882	1	0.75	0.03125	50000000	23000000	92-5-5	4.75	732.79	0
1	1	57.7882	1	0.75	0.03125	50000000	340000000	92-11-5	4.75	733.425	0
1	1	57.7882	1	0.75	0.03125	50000000	2300000000	73-5-5	4.75	744.22	0
1	1	57.7882	1	0.75	0.03125	50000000	340000000	73-8-5	4.75	746.125	0
1	1	57.7882	1	0.75	0.03125	50000000	23000000	92-2-5	4.75	750.57	0
1	1	57.7882	1	0.75	0.03125	50000000	23000000	92-8-5	4.75	755.015	0
1	1	57.7882	1	0.75	0.03125	50000000	2300000000	73-2-5	4.75	759.46	0
1	1	52.5284	2	22.5	0.9375	50000000	23000000	75-4-4	5.5	681.99	0
1	1	52.5284	2	22.5	0.9375	50000000	340000000	94-4-4	5.5	688.34	0
1	1	52.5284	2	22.5	0.9375	50000000	23000000	75-9-4	5.5	697.23	0
1	1	52.5284	2	22.5	0.9375	50000000	23000000	94-3-4	5.5	697.865	0
1	1	52.5284	2	22.5	0.9375	50000000	23000000	94-9-4	5.5	702.31	0
1	1	52.5284	2	22.5	0.9375	50000000	2300000000	75-11-4	5.5	703.58	0
1	1	52.5284	2	22.5	0.9375	50000000	23000000	94-11-4	5.5	709.295	0
1	1	52.5284	2	22.5	0.9375	50000000	23000000	75-3-4	5.5	713.105	0
1	1	14.5223	3	44.5	1.85417	50000000	23000000	96-7-3	5.5	671.195	0
1	1	14.5223	3	44.5	1.85417	50000000	23000000	96-3-3	5.5	685.165	0
1	1	14.5223	3	44.5	1.85417	50000000	2300	77-3-3	5.5	702.945	0
1	1	14.5223	3	44.5	1.85417	50000000	230000	96-6-3	5.5	735.33	0
1	1	14.5223	3	44.5	1.85417	50000000	23000000	96-12-3	5.5	741.68	0
1	1	14.5223	3	44.5	1.85417	50000000	230000	77-12-3	5.5	746.125	0
1	1	14.5223	3	44.5	1.85417	50000000	23000000	77-6-3	5.5	750.57	0
1	1	14.5223	3	44.5	1.85417	50000000	230000	77-7-3	5.5	751.205	0
1	1	48.8607	4	68.5	2.85417	50000000	230000	98-6-2	6.75	730.885	0
1	1	48.8607	4	68.5	2.85417	50000000	3400000	98-12-2	6.75	741.045	0
1	1	48.8607	4	68.5	2.85417	50000000	3400000	79-6-2	6.75	744.22	0
1	1	48.8607	4	68.5	2.85417	50000000	230000	79-12-2	6.75	748.03	0
1	1	48.8607	4	68.5	2.85417	50000000	230000	98-1-2	6.75	762.635	0
1	1	48.8607	4	68.5	2.85417	50000000	230000	79-1-2	6.75	768.35	0
1	1	48.8607	4	68.5	2.85417	50000000	230000	79-7-2	6.75	776.605	0
1	1	48.8607	4	68.5	2.85417	50000000	230000	98-7-2	6.75	777.24	0
1	1	75.9925	5	93.75	3.90625	50000000	23000000	100-10-1	5.25	756.92	0
1	1	75.9925	5	93.75	3.90625	50000000	230000	81-9-1	5.25	770.89	0
1	1	75.9925	5	93.75	3.90625	50000000	230000	100-3-1	5.25	771.525	0
1	1	75.9925	5	93.75	3.90625	50000000	3400000	100-8-1	5.25	775.335	0
1	1	75.9925	5	93.75	3.90625	50000000	3400000	81-11-1	5.25	775.97	0
1	1	75.9925	5	93.75	3.90625	50000000	230000	100-6-1	5.25	786.765	0
1	1	75.9925	5	93.75	3.90625	50000000	34000	81-2-1	5.25	787.4	0
1	1	75.9925	5	93.75	3.90625	50000000	230000	81-5-1	5.25	791.845	0
1	1	26.532	6	116	4.83333	50000000	230000	73-10-PR	9.5		0
1	1	26.532	6	116	4.83333	50000000	230000	75-4-PR	9.5		0
1	1	26.532	6	116	4.83333	50000000	34000	79-2-PR	9.5		0
1	1	26.532	6	116	4.83333	50000000	230000	81-4-PR	9.5		0
1	1	26.532	6	116	4.83333	50000000	2300	94-4-PR	9.5		0
1	1	26.532	6	116	4.83333	50000000	2300	94-9-PR	9.5		0
1	1	26.532	6	116	4.83333	50000000	230000	96-10-PR	9.5		0
1	1	26.532	6	116	4.83333	50000000	23000000	98-4-PR	9.5		0
1	1	65.3385	7	119.5	4.97917	50000000	230000	75-16-PO	8	694.055	1
1	1	65.3385	7	119.5	4.97917	50000000	230000	94-16-PO	8	697.23	1
1	1	65.3385	7	119.5	4.97917	50000000	230000	98-6-PO	8	719.455	1
1	1	65.3385	7	119.5	4.97917	50000000	2300	100-2-PO	8	731.52	1
1	1	65.3385	7	119.5	4.97917	50000000	230000	75-9-PO	8	733.425	1
1	1	65.3385	7	119.5	4.97917	50000000	230000	81-6-PO	8	758.19	1
1	1	65.3385	7	119.5	4.97917	50000000	230000	77-16-PO	8	760.095	1
1	1	65.3385	7	119.5	4.97917	50000000	3400000	92-16-PO	8	763.27	1
1	1	40.2579	8	142.25	5.92708	50000000	230000	77-5-1-po	7	683.26	1
1	1	40.2579	8	142.25	5.92708	50000000	230000	77-14-1-po	7	688.34	1
1	1	40.2579	8	142.25	5.92708	50000000	34000	98-3-1-po	7	730.25	1
1	1	40.2579	8	142.25	5.92708	50000000	230000	92-5-1-po	7	730.885	1
1	1	40.2579	8	142.25	5.92708	50000000	340000000	92-14-1-po	7	734.06	1
1	1	40.2579	8	142.25	5.92708	50000000	230000	75-1-1-po	7	760.095	1
1	1	40.2579	8	142.25	5.92708	50000000	3400000	94-1-1-po	7	765.81	1
1	1	40.2579	8	142.25	5.92708	50000000	3400000	81-3-1-po	7	779.145	1
1	1	58.3094	9	164.5	6.85417	50000000	230000	94-18-2-po	6	733.425	1
1	1	58.3094	9	164.5	6.85417	50000000	230000	75-18-2-po	6	734.06	1
1	1	58.3094	9	164.5	6.85417	50000000	230000	79-18-2-po	6	740.41	1
1	1	58.3094	9	164.5	6.85417	50000000	230000	96-8-2-po	6	748.665	1
1	1	58.3094	9	164.5	6.85417	50000000	3400000	73-8-2-po	6	767.08	1
1	1	58.3094	9	164.5	6.85417	50000000	2300	79-10-2-po	6	770.89	1
1	1	58.3094	9	164.5	6.85417	50000000	3400000	100-18-2-po	6	800.1	1
1	1	58.3094	9	164.5	6.85417	50000000	230000	100-10-2-po	6	805.815	1
1	1	53.1801	10	188	7.83333	50000000	230000	79-4-3-po	6.25	715.645	1
1	1	53.1801	10	188	7.83333	50000000	230000	98-15-3-po	6.25	723.9	1
1	1	53.1801	10	188	7.83333	50000000	2300	100-4-3-po	6.25	750.57	1
1	1	53.1801	10	188	7.83333	50000000	230000	94-10-3-po	6.25	760.73	1
1	1	53.1801	10	188	7.83333	50000000	34000	96-1-3-po	6.25	762	1
1	1	53.1801	10	188	7.83333	50000000	230000	75-10-3-po	6.25	783.59	1
1	1	53.1801	10	188	7.83333	50000000	34000	73-1-3-po	6.25	785.495	1
1	1	30.7475	11	212.5	8.85417	50000000	34000	79-5-4-po	6	702.31	1
1	1	30.7475	11	212.5	8.85417	50000000	230000	75-3-4-po	6	711.2	1
1	1	30.7475	11	212.5	8.85417	50000000	230000	79-16-4-po	6	711.2	1
1	1	30.7475	11	212.5	8.85417	50000000	230000	94-3-4-po	6	720.725	1
1	1	30.7475	11	212.5	8.85417	50000000	2300	77-7-4-po	6	722.63	1
1	1	30.7475	11	212.5	8.85417	50000000	2300	92-7-4-po	6	762	1
1	1	30.7475	11	212.5	8.85417	50000000	2300	100-5-4-po	6	768.35	1
1	1	30.7475	11	212.5	8.85417	50000000	230000	100-16-4-po	6	776.605	1
1	1	48.8059	12	236	9.83333	50000000	34000	96-4-5-po	5.5	694.055	1
1	1	48.8059	12	236	9.83333	50000000	2300	79-7-5-po	5.5	708.025	1
1	1	48.8059	12	236	9.83333	50000000	230000	94-17-5-po	5.5	713.105	1
1	1	48.8059	12	236	9.83333	50000000	2300	75-17-5-po	5.5	716.915	1
1	1	48.8059	12	236	9.83333	50000000	2300	73-4-5-po	5.5	735.965	1
1	1	48.8059	12	236	9.83333	50000000	34000	98-9-5-po	5.5	768.35	1
1	1	48.8059	12	236	9.83333	50000000	2300	100-7-5-po	5.5	810.895	1
1	1	48.8059	12	236	9.83333	50000000	34000	81-9-5-po	5.5	812.8	1
1	2	57.7882	1	0.75	0.03125	30300000	23000000	92-3-5	4.75	725.17	0
1	2	57.7882	1	0.75	0.03125	30300000	340000000	73-10-5	4.75	727.075	0
1	2	57.7882	1	0.75	0.03125	30300000	2300000000	92-10-5	4.75	734.695	0
1	2	57.7882	1	0.75	0.03125	30300000	340000000	73-3-5	4.75	737.235	0
1	2	57.7882	1	0.75	0.03125	30300000	340000000	73-4-5	4.75	746.76	0
1	2	57.7882	1	0.75	0.03125	30300000	340000000	92-4-5	4.75	751.84	0
1	2	57.7882	1	0.75	0.03125	30300000	23000000	73-7-5	4.75	774.7	0
1	2	57.7882	1	0.75	0.03125	30300000	250000000	92-7-5	4.75	777.24	0
1	2	52.5284	2	22.5	0.9375	30300000	23000000	75-10-4	5.5	688.34	0
1	2	52.5284	2	22.5	0.9375	30300000	340000000	94-10-4	5.5	688.975	0
1	2	52.5284	2	22.5	0.9375	30300000	23000000	94-5-4	5.5	700.405	0
1	2	52.5284	2	22.5	0.9375	30300000	23000000	75-8-4	5.5	715.645	0
1	2	52.5284	2	22.5	0.9375	30300000	340000000	75-5-4	5.5	718.185	0
1	2	52.5284	2	22.5	0.9375	30300000	230000	94-2-4	5.5	721.36	0
1	2	52.5284	2	22.5	0.9375	30300000	23000000	94-8-4	5.5	728.345	0
1	2	52.5284	2	22.5	0.9375	30300000	23000000	75-2-4	5.5	730.25	0
1	2	14.5223	3	44.5	1.85417	30300000	3400000	96-10-3	5.5	684.53	0
1	2	14.5223	3	44.5	1.85417	30300000	23000000	77-10-3	5.5	694.055	0
1	2	14.5223	3	44.5	1.85417	30300000	230000	96-2-3	5.5	702.31	0
1	2	14.5223	3	44.5	1.85417	30300000	230000	96-5-3	5.5	704.85	0
1	2	14.5223	3	44.5	1.85417	30300000	23000000	96-8-3	5.5	706.755	0
1	2	14.5223	3	44.5	1.85417	30300000	230000	77-8-3	5.5	709.295	0
1	2	14.5223	3	44.5	1.85417	30300000	3000000	77-2-3	5.5	725.805	0
1	2	14.5223	3	44.5	1.85417	30300000	3400000	77-5-3	5.5	726.44	0
1	2	48.8607	4	68.5	2.85417	30300000	230000	98-4-2	6.75	706.755	0
1	2	48.8607	4	68.5	2.85417	30300000	3400000	98-11-2	6.75	710.565	0
1	2	48.8607	4	68.5	2.85417	30300000	3400000	79-11-2	6.75	711.2	0
1	2	48.8607	4	68.5	2.85417	30300000	230000	79-4-2	6.75	723.265	0
1	2	48.8607	4	68.5	2.85417	30300000	3400000	79-8-2	6.75	736.6	0
1	2	48.8607	4	68.5	2.85417	30300000	230000	98-2-2	6.75	736.6	0
1	2	48.8607	4	68.5	2.85417	30300000	230000	98-8-2	6.75	746.125	0
1	2	48.8607	4	68.5	2.85417	30300000	3400000	79-2-2	6.75	755.65	0
1	2	75.9925	5	93.75	3.90625	30300000	3400000	81-10-1	5.25	763.905	0
1	2	75.9925	5	93.75	3.90625	30300000	34000	81-8-1	5.25	769.62	0
1	2	75.9925	5	93.75	3.90625	30300000	2300000	81-4-1	5.25	770.89	0
1	2	75.9925	5	93.75	3.90625	30300000	230000	100-9-1	5.25	775.335	0
1	2	75.9925	5	93.75	3.90625	30300000	34000	100-12-1	5.25	775.97	0
1	2	75.9925	5	93.75	3.90625	30300000	3400000	100-5-1	5.25	780.415	0
1	2	75.9925	5	93.75	3.90625	30300000	34000	100-1-1	5.25	798.83	0
1	2	75.9925	5	93.75	3.90625	30300000	230000	81-1-1	5.25	809.625	0
1	2	26.532	6	116	4.83333	30300000	230000	73-3-PR	9.5		0
1	2	26.532	6	116	4.83333	30300000	230000	77-2-PR	9.5		0
1	2	26.532	6	116	4.83333	30300000	230000	79-1-PR	9.5		0
1	2	26.532	6	116	4.83333	30300000	230000	81-5-PR	9.5		0
1	2	26.532	6	116	4.83333	30300000	3400000	92-2-PR	9.5		0
1	2	26.532	6	116	4.83333	30300000	34000	96-3-PR	9.5		0
1	2	26.532	6	116	4.83333	30300000	230000	98-5-PR	9.5		0
1	2	26.532	6	116	4.83333	30300000	34000	100-1-PR	9.5		0
1	2	65.3385	7	119.5	4.97917	30300000	230000	77-12-PO	8	683.26	1
1	2	65.3385	7	119.5	4.97917	30300000	34000	77-6-PO	8	692.15	1
1	2	65.3385	7	119.5	4.97917	30300000	230000	79-15-PO	8	699.135	1
1	2	65.3385	7	119.5	4.97917	30300000	230000	96-2-PO	8	727.71	1
1	2	65.3385	7	119.5	4.97917	30300000	230000	92-12-PO	8	736.6	1
1	2	65.3385	7	119.5	4.97917	30300000	230000	92-6-PO	8	741.045	1
1	2	65.3385	7	119.5	4.97917	30300000	230000	100-15-PO	8	757.555	1
1	2	65.3385	7	119.5	4.97917	30300000	230000	73-2-PO	8	758.825	1
1	2	40.2579	8	142.25	5.92708	30300000	230000	75-8-1-po	7	713.105	1
1	2	40.2579	8	142.25	5.92708	30300000	230000	94-8-1-po	7	724.535	1
1	2	40.2579	8	142.25	5.92708	30300000	340000000	100-3-1-po	7	737.235	1
1	2	40.2579	8	142.25	5.92708	30300000	230000	96-9-1-po	7	764.54	1
1	2	40.2579	8	142.25	5.92708	30300000	23000000	81-8-1-po	7	784.225	1
1	2	40.2579	8	142.25	5.92708	30300000	340000000	73-9-1-po	7	787.4	1
1	2	58.3094	9	164.5	6.85417	30300000	230000	96-13-2-po	6	683.26	1
1	2	58.3094	9	164.5	6.85417	30300000	2300	77-3-2-po	6	702.31	1
1	2	58.3094	9	164.5	6.85417	30300000	230000	77-15-2-po	6	723.9	1
1	2	58.3094	9	164.5	6.85417	30300000	230000	73-13-2-po	6	725.17	1
1	2	58.3094	9	164.5	6.85417	30300000	34000	92-15-2-po	6	739.775	1
1	2	58.3094	9	164.5	6.85417	30300000	230000	98-2-2-po	6	744.855	1
1	2	58.3094	9	164.5	6.85417	30300000	230000	92-3-2-po	6	748.03	1
1	2	58.3094	9	164.5	6.85417	30300000	34000	81-2-2-po	6	772.16	1
1	2	53.1801	10	188	7.83333	30300000	34000	96-11-3-po	6.25	699.135	1
1	2	53.1801	10	188	7.83333	30300000	2300	75-12-3-po	6.25	709.295	1
1	2	53.1801	10	188	7.83333	30300000	34000	98-11-3-po	6.25	715.01	1
1	2	53.1801	10	188	7.83333	30300000	34000	77-10-3-po	6.25	727.075	1
1	2	53.1801	10	188	7.83333	30300000	34000	94-12-3-po	6.25	735.965	1
1	2	53.1801	10	188	7.83333	30300000	230000	73-11-3-po	6.25	744.855	1
1	2	53.1801	10	188	7.83333	30300000	230000	92-10-3-po	6.25	767.715	1
1	2	53.1801	10	188	7.83333	30300000	2300	81-11-3-po	6.25	774.065	1
1	2	30.7475	11	212.5	8.85417	30300000	230000	77-13-4-po	6	682.625	1
1	2	30.7475	11	212.5	8.85417	30300000	34000	75-6-4-po	6	690.88	1
1	2	30.7475	11	212.5	8.85417	30300000	3400000	94-6-4-po	6	695.96	1
1	2	30.7475	11	212.5	8.85417	30300000	30000	96-6-4-po	6	698.5	1
1	2	30.7475	11	212.5	8.85417	30300000	34000	92-13-4-po	6	723.9	1
1	2	30.7475	11	212.5	8.85417	30300000	230000	98-7-4-po	6	736.6	1
1	2	30.7475	11	212.5	8.85417	30300000	230000	73-6-4-po	6	741.045	1
1	2	30.7475	11	212.5	8.85417	30300000	2300	81-7-4-po	6	777.875	1
1	2	48.8059	12	236	9.83333	30300000	34000	94-14-5-po	5.5	687.07	1
1	2	48.8059	12	236	9.83333	30300000	34000	75-14-5-po	5.5	698.5	1
1	2	48.8059	12	236	9.83333	30300000	2300	98-14-5-po	5.5	711.2	1
1	2	48.8059	12	236	9.83333	30300000	34000	79-8-5-po	5.5	720.725	1
1	2	48.8059	12	236	9.83333	30300000	34000	94-2-5-po	5.5	730.25	1
1	2	48.8059	12	236	9.83333	30300000	2300	75-2-5-po	5.5	742.95	1
1	2	48.8059	12	236	9.83333	30300000	2300	81-14-5-po	5.5	758.825	1
1	2	48.8059	12	236	9.83333	30300000	2300	100-8-5-po	5.5	850.9	1
0	2	50	5	92.75	3.86458	41700000	248	79-2-1	4.92	720.725	0	Not included in analysis: below or above detectable threshold
0	2	50	5	92.75	3.86458	41700000	248	79-4-1	4.92	704.215	0
0	2	50	5	92.75	3.86458	41700000	248	92-7-1	4.92	779.145	0
0	2	44	6	115.75	4.82292	41700000	248	73-3-PR	12.75		0
0	0	54	8	141.25	5.88542	37750000	3450000000000	77-8-1-po	6.25	760.095	1
0	2	54	8	141.25	5.88542	41700000	3450000000000	96-9-1-po	6.25	740.41	1
0	0	54	8	141.25	5.88542	37750000	3450000000000	100-11-1-po	6.25	737.87	1
0	2	52	9	165.25	6.88542	41700000	248	77-15-2-po	5.25	715.645	1
0	0	47.3777	12	234.75	9.78125	37750000	248	92-4-5-po	8.75	726.44	1
1	2	40.2579	8	142.25	5.92708	30300000	248	98-8-1-po	7	760.73	1
1	1	53	10	188	7.83333	50000000	248	81-15-3-po	6.25	784.86	1
1	0	48.8059	12	236	9.83333	45550000	248	79-12-5-po	5.5	735.965	1
1	0	48.8059	12	236	9.83333	45550000	248	79-17-5-po	5.5	714.375	1

## Sheet: CimisData
stnid	date	hour	jul	precip	solrad	vapor	airtemp	hum	dew	windspd	winddir	soiltemp	trial
116	2012-07-27	1200	209	0	939	1.4	17	75	12.5	3.7	288	21	0
116	2012-07-27	1300	209	0	936	1.4	17	74	12.4	4.7	282	21	0
116	2012-07-27	1400	209	0	850	1.5	17	75	12.6	5.2	291	21	0
116	2012-07-27	1500	209	0	721	1.5	17	77	13	5.1	286	21.1	0
116	2012-07-27	1600	209	0	387	1.5	16.3	80	12.8	4.9	282	21.1	0
116	2012-07-27	1700	209	0	194	1.5	15.3	83	12.5	4.4	284	21.2	0
116	2012-07-27	1800	209	0	79	1.4	14.7	86	12.4	3.5	279	21.3	0
116	2012-07-27	1900	209	0	15	1.4	14.1	89	12.3	3.2	279	21.4	0
116	2012-07-27	2000	209	0	0	1.4	13.2	93	12	3.4	266	21.5	0
116	2012-07-27	2100	209	0	0	1.4	12.7	95	12	2.7	266	21.6	0
116	2012-07-27	2200	209	0	0	1.4	12.6	96	12	2.1	277	21.7	0
116	2012-07-27	2300	209	0	0	1.5	12.4	100	12.4	1.9	252	21.7	0
116	2012-07-27	2400	209	0	0	1.7	12	100	12	2.3	235	21.7	0
116	2012-07-28	100	210	0	0	1.7	11.9	100	11.9	2.1	224	21.7	0
116	2012-07-28	200	210	0	0	1.7	11.8	100	11.8	1.7	228	21.6	0
116	2012-07-28	300	210	0	0	1.8	11.9	100	11.9	1.7	204	21.6	0
116	2012-07-28	400	210	0	0	1.8	12	100	12	1.8	214	21.5	0
116	2012-07-28	500	210	0	0	1.9	11.9	100	11.9	2	202	21.4	0
116	2012-07-28	600	210	0	12	1.9	12	100	12	2.3	171	21.3	0
116	2012-07-28	700	210	0	85	1.9	12	100	12	2	192	21.2	0
116	2012-07-28	800	210	0	129	1.8	12.3	100	12.3	1.7	213	21.1	0
116	2012-07-28	900	210	0	178	1.7	12.8	100	12.8	1.8	241	21	0
116	2012-07-28	1000	210	0	244	1.6	13.3	100	13.3	2.2	243	20.9	0
116	2012-07-28	1100	210	0	408	1.5	14.3	89	12.5	2.9	266	20.9	0
116	2012-07-28	1200	210	0	564	1.4	15	84	12.3	3.9	272	20.8	0
116	2012-07-28	1300	210	0		1.4	15.4	82	12.4	3.8	273	20.8	0
116	2012-07-28	1400	210	0	745	1.5	16	80	12.7	4.1	274	20.8	0
116	2012-07-28	1500	210	0	637	1.5	15.9	82	12.8	4.4	275	20.8	0
116	2012-07-28	1600	210	0	491	1.5	15.6	83	12.7	4.7	271	20.8	0
116	2012-07-28	1700	210	0	282	1.5	15.1	86	12.7	4.8	265	20.9	0
116	2012-07-28	1800	210	0	112	1.5	14.3	89	12.5	5.1	255	20.9	0
116	2012-07-28	1900	210	0	30	1.4	13.7	91	12.3	4.9	245	21	0
116	2012-07-28	2000	210	0	1	1.4	13.5	93	12.3	4.8	237	21	0
116	2012-07-28	2100	210	0	0	1.4	13.4	93	12.3	4.6	233	21	0
116	2012-07-28	2200	210	0	0	1.4	13.3	94	12.3	4.3	230	21	0
116	2012-07-28	2300	210	0	0	1.4	13.3	94	12.4	3.2	235	21	0
116	2012-07-28	2400	210	0	0	1.4	13.3	94	12.4	3.3	240	21	0
116	2012-07-29	100	211	0	0	1.5	13.1	99	12.9	3.2	246	20.9	0
116	2012-07-29	200	211	0	0	1.6	12.7	100	12.7	3.3	250	20.9	0
116	2012-07-29	300	211	0	0	1.5	12.3	100	12.3	2.3	244	20.9	0
116	2012-07-29	400	211	0	0	1.5	12.5	100	12.5	1.9	252	20.8	0
116	2012-07-29	500	211	0	0	1.5	12.1	100	12.1	2.8	230	20.8	0
116	2012-07-29	600	211	0	11	1.5	11.9	100	11.9	1.8	241	20.7	0
116	2012-07-29	700	211	0	39	1.6	12	100	12	1.6	247	20.7	0
116	2012-07-29	800	211	0	87	1.6	12.2	100	12.2	2	227	20.6	0
116	2012-07-29	900	211	0	161	1.4	12.9	96	12.2	1.5	299	20.5	0
116	2012-07-29	1000	211	0	242	1.4	13.6	92	12.3	2.3	249	20.5	0
116	2012-07-29	1100	211	0	426	1.4	14.4	86	12.1	2.8	256	20.4	0
116	2012-07-29	1200	211	0	647	1.5	15.4	83	12.6	4	273	20.4	0
116	2012-07-29	1300	211	0	841	1.5	16	80	12.7	4.6	279	20.4	0
116	2012-07-29	1400	211	0	751	1.5	15.9	81	12.6	4.5	277	20.4	0
116	2012-07-29	1500	211	0	450	1.4	15.1	84	12.5	4.5	273	20.4	0
116	2012-07-29	1600	211	0	277	1.4	14.2	88	12.2	4.5	274	20.5	0
116	2012-07-29	1700	211	0	137	1.4	13.5	91	12	4.1	267	20.5	0
116	2012-07-29	1800	211	0	62	1.4	13	93	12	4.2	254	20.6	0
116	2012-07-29	1900	211	0	16	1.4	12.6	97	12.1	4.1	250	20.7	0
116	2012-07-29	2000	211	0	0	1.5	12.4	100	12.4	3.5	247	20.7	0
116	2012-07-29	2100	211	0	0	1.7	12.3	100	12.3	3.7	233	20.8	0
116	2012-07-29	2200	211	0	0	1.7	12.4	100	12.4	3.4	238	20.8	0
116	2012-07-29	2300	211	0	0	1.7	12.4	100	12.4	2.9	234	20.7	0
116	2012-07-29	2400	211	0	0	1.8	12.6	100	12.6	2.1	236	20.7	0
116	2012-07-30	100	212	0	0	1.8	12.3	100	12.3	1.6	237	20.7	0
116	2012-07-30	200	212	0	0	1.9	12	100	12	1.5	203	20.7	0
116	2012-07-30	300	212	0	0	1.9	11.7	100	11.7	1.8	193	20.6	0
116	2012-07-30	400	212	0	0	1.9	11.5	100	11.5	1.4	117	20.6	0
116	2012-07-30	500	212	0	0	1.9	11.3	100	11.3	1.3	118	20.5	0
116	2012-07-30	600	212	0	12	1.9	11.3	100	11.3	1.6	133	20.5	0
116	2012-07-30	700	212	0	56	1.9	11.7	100	11.7	1.9	126	20.4	0
116	2012-07-30	800	212	0	140	1.9	11.7	100	11.7	1.7	122	20.4	0
116	2012-07-30	900	212	0	321	1.8	13	100	13	1.3	133	20.3	0
116	2012-07-30	1000	212	0	748	1.5	15.8	83	13	1.7	284	20.2	0
116	2012-07-30	1100	212	0	872	1.6	17.8	76	13.6	3.3	291	20.2	0
116	2012-07-30	1200	212	0	934	1.5	17.3	78	13.4	4.4	292	20.2	0
116	2012-07-30	1300	212	0	939	1.5	17	78	13.1	5	293	20.3	0
116	2012-07-30	1400	212	0	889	1.5	16.7	79	13	4.9	296	20.3	0
116	2012-07-30	1500	212	0	784	1.5	16.1	81	12.9	4.8	287	20.4	0
116	2012-07-30	1600	212	0	567	1.5	15.3	84	12.5	4.3	290	20.5	0
116	2012-07-30	1700	212	0	287	1.4	14.1	89	12.3	3.5	280	20.7	0
116	2012-07-30	1800	212	0	106	1.4	13	96	12.3	2.9	277	20.8	0
116	2012-07-30	1900	212	0	23	1.6	12.2	100	12.2	3.2	270	21	0
116	2012-07-30	2000	212	0	1	1.7	12.1	100	12.1	2.5	289	21.1	0
116	2012-07-30	2100	212	0	0	1.5	12.5	100	12.5	1.9	297	21.3	0
116	2012-07-30	2200	212	0	0	1.4	12.1	100	12.1	1.3	332	21.4	0
116	2012-07-30	2300	212	0	0	1.7	12.1	100	12.1	1.8	286	21.4	0
116	2012-07-30	2400	212	0	0	1.9	12	100	12	2.1	244	21.4	0
116	2012-07-31	100	213	0	0	2	11.7	100	11.7	2.5	243	21.4	0
116	2012-07-31	200	213	0	0	2	11.7	100	11.7	2.5	239	21.4	0
116	2012-07-31	300	213	0	0	2	11.6	100	11.6	2.2	234	21.3	0
116	2012-07-31	400	213	0	0	2.1	11.6	100	11.6	1.7	208	21.2	0
116	2012-07-31	500	213	0	0	2.1	11.5	100	11.5	1.3	174	21.1	0
116	2012-07-31	600	213	0	12	2.1	11.5	100	11.5	0.9	112	21.1	0
116	2012-07-31	700	213	0	54	2.1	11.4	100	11.4	1.2	275	21	0
116	2012-07-31	800	213	0	119	2.1	11.8	100	11.8	1.1	172	20.9	0
116	2012-07-31	900	213	0	266	2.2	12.6	100	12.6	1.1	224	20.8	0
116	2012-07-31	1000	213	0	693	1.7	15.3	96	14.7	2.3	308	20.7	0
116	2012-07-31	1100	213	0	867	1.5	16.9	80	13.5	3.9	292	20.7	0
116	2012-07-31	1200	213	0	923	1.5	16.8	79	13.2	4.7	288	20.7	0
116	2012-07-31	1300	213	0	930	1.5	16.8	78	13	4.8	291	20.7	0
116	2012-07-31	1400	213	0	870	1.5	16.5	78	12.7	4.7	297	20.8	0
116	2012-07-31	1500	213	0	763	1.4	16.1	79	12.4	4.4	285	20.8	0
116	2012-07-31	1600	213	0	530	1.4	15.4	82	12.3	4.3	284	20.9	0
116	2012-07-31	1700	213	0	246	1.4	14.2	87	12	4.1	290	21	0
116	2012-07-31	1800	213	0	84	1.4	13.1	94	12.1	3.4	270	21.2	0
116	2012-07-31	1900	213	0	19	1.5	12.3	100	12.3	3.1	274	21.3	0
116	2012-07-31	2000	213	0	0	1.7	11.8	100	11.8	2.8	256	21.4	0
116	2012-07-31	2100	213	0	0	1.9	11.6	100	11.6	2.4	266	21.5	0
116	2012-07-31	2200	213	0	0	1.9	11.7	100	11.7	2.3	278	21.6	0
116	2012-07-31	2300	213	0	0	2	12	100	12	2.4	258	21.7	0
116	2012-07-31	2400	213	0	0	2	12	100	12	2.7	249	21.7	0
116	2012-08-01	100	214	0	0	2	12	100	12	2.3	212	21.6	0
116	2012-08-01	200	214	0	0	1.8	11.8	100	11.8	2.4	184	21.6	0
116	2012-08-01	300	214	0	0	1.7	11.4	100	11.4	1.8	226	21.5	0
116	2012-08-01	400	214	0	0	1.8	11.2	100	11.2	1.3	247	21.5	0
116	2012-08-01	500	214	0	0	1.9	11.4	100	11.4	1.3	222	21.4	0
116	2012-08-01	600	214	0	9	1.8	11.3	100	11.3	1.5	204	21.3	0
116	2012-08-01	700	214	0	52	1.8	11.1	100	11.1	1.8	227	21.2	0
116	2012-08-01	800	214	0	135	1.7	11.5	100	11.5	1.2	300	21.1	0
116	2012-08-01	900	214	0	245	1.5	12.6	100	12.6	1.3	285	21	0
116	2012-08-01	1000	214	0	590	1.4	14.7	85	12.1	2.1	286	21	0
116	2012-08-01	1100	214	0	861	1.4	16.1	79	12.4	3.4	283	20.9	0
116	2012-08-01	1200	214	0	920	1.5	16.5	78	12.7	4.6	290	20.9	0
116	2012-08-01	1300	214	0	931	1.4	16.3	78	12.4	5.2	295	20.9	0
116	2012-08-01	1400	214	0	881	1.4	15.9	79	12.2	5.1	292	20.9	0
116	2012-08-01	1500	214	0	705	1.4	15.6	80	12.1	4.7	292	21	0
116	2012-08-01	1600	214	0	460	1.4	14.8	83	11.9	4.5	292	21.1	0
116	2012-08-01	1700	214	0	268	1.4	13.9	87	11.8	4.2	287	21.2	0
116	2012-08-01	1800	214	0	85	1.4	12.7	94	11.7	4.1	279	21.3	0
116	2012-08-01	1900	214	0	14	1.6	12	100	12	3.6	260	21.4	0
116	2012-08-01	2000	214	0	0	1.8	11.7	100	11.7	3	253	21.5	0
116	2012-08-01	2100	214	0	0	1.9	11.4	100	11.4	2.7	251	21.6	0
116	2012-08-01	2200	214	0	0	1.9	11.3	100	11.3	2.5	262	21.7	0
116	2012-08-01	2300	214	0	0	2	11.3	100	11.3	2.1	259	21.7	0
116	2012-08-01	2400	214	0	0	2	11.3	100	11.3	1.7	231	21.7	0
116	2012-08-02	100	215	0	0	2	11.3	100	11.3	2	215	21.7	0
116	2012-08-02	200	215	0	0	2	11.2	100	11.2	2	187	21.6	0
116	2012-08-02	300	215	0	0	2	10.8	100	10.8	1.7	170	21.6	0
116	2012-08-02	400	215	0	0	2	10.7	100	10.7	1.5	164	21.5	0
116	2012-08-02	500	215	0	0	2	10.9	100	10.9	1.4	192	21.4	0
116	2012-08-02	600	215	0	9	2	11.1	100	11.1	1.6	154	21.3	0
116	2012-08-02	700	215	0	55	2.1	11.2	100	11.2	1.5	158	21.2	0
116	2012-08-02	800	215	0	139	2.1	11.5	100	11.5	1.5	168	21.1	0
116	2012-08-02	900	215	0	485	1.8	13	100	13	1.5	236	21	0
116	2012-08-02	1000	215	0	745	1.5	14.9	88	13	2.5	277	20.9	0
116	2012-08-02	1100	215	0	853	1.5	15.7	82	12.7	4.1	286	20.9	0
116	2012-08-02	1200	215	0	921	1.4	15.6	81	12.4	4.8	290	20.9	0
116	2012-08-02	1300	215	0	853	1.4	15.7	81	12.5	4.9	292	20.9	0
116	2012-08-02	1400	215	0	691	1.4	15.3	82	12.3	5.2	289	21	0
116	2012-08-02	1500	215	0	483	1.4	14.6	85	12.2	4.9	287	21	0
116	2012-08-02	1600	215	0	259	1.4	13.9	89	12	5	282	21.1	0
116	2012-08-02	1700	215	0	148	1.4	13.3	92	12	4.4	278	21.2	0
116	2012-08-02	1800	215	0	51	1.4	12.6	96	11.9	4.6	276	21.3	0
116	2012-08-02	1900	215	0	10	1.5	12	100	12	3.6	272	21.4	0
116	2012-08-02	2000	215	0	0	1.7	11.7	100	11.7	3.1	262	21.5	0
116	2012-08-02	2100	215	0	0	1.9	11.5	100	11.5	2.8	248	21.5	0
116	2012-08-02	2200	215	0	0	1.9	11.3	100	11.3	2.7	259	21.6	0
116	2012-08-02	2300	215	0	0	1.9	11.3	100	11.3	2.5	249	21.6	0
116	2012-08-02	2400	215	0	0	1.9	11.2	100	11.2	2	246	21.6	0
116	2012-08-03	100	216	0	0	2	11.1	100	11.1	1.9	241	21.5	0
116	2012-08-03	200	216	0	0	2	10.9	100	10.9	1.7	218	21.5	0
116	2012-08-03	300	216	0	0	2	10.8	100	10.8	1.5	243	21.4	0
116	2012-08-03	400	216	0	0	2	10.8	100	10.8	1.6	232	21.3	0
116	2012-08-03	500	216	0	0	2	10.8	100	10.8	1.9	182	21.2	0
116	2012-08-03	600	216	0	12	2	10.7	100	10.7	1.9	180	21.1	0
116	2012-08-03	700	216	0	56	2	10.8	100	10.8	2	189	21	0
116	2012-08-03	800	216	0	118	2	11.2	100	11.2	1.6	221	20.9	0
116	2012-08-03	900	216	0	193	2	11.9	100	11.9	2.2	222	20.8	0
116	2012-08-03	1000	216	0	308	2	13	100	13	3.2	260	20.8	0
116	2012-08-03	1100	216	0	415	1.7	13.9	100	13.9	3.6	280	20.7	0
116	2012-08-03	1200	216	0	597	1.5	14.8	89	13	4.1	286	20.7	0
116	2012-08-03	1300	216	0	606	1.5	15.3	85	12.9	4.2	281	20.7	0
116	2012-08-03	1400	216	0	459	1.5	15.2	87	13.1	4.7	285	20.7	0
116	2012-08-03	1500	216	0	364	1.5	15.2	87	13	5.2	282	20.7	0
116	2012-08-03	1600	216	0	309	1.5	15	86	12.8	4.6	280	20.7	0
116	2012-08-03	1700	216	0	170	1.5	14.4	89	12.5	4.7	285	20.8	0
116	2012-08-03	1800	216	0	57	1.5	14	91	12.6	4	285	20.8	0
116	2012-08-03	1900	216	0	10	1.5	13.8	93	12.7	3.2	286	20.9	0
116	2012-08-03	2000	216	0	0	1.5	13.6	98	13.2	2.8	288	20.9	0
116	2012-08-03	2100	216	0	0	1.6	13.4	100	13.4	2.5	294	20.9	0
116	2012-08-03	2200	216	0	0	1.7	13.2	100	13.2	2.5	300	21	0
116	2012-08-03	2300	216	0	0	1.9	12.7	100	12.7	2.4	291	21	0
116	2012-08-03	2400	216	0	0	2	12.4	100	12.4	2.2	297	21	0
116	2012-08-04	100	217	0	0	2	12.4	100	12.4	1.6	284	21	0
116	2012-08-04	200	217	0	0	2.1	12.4	100	12.4	2	256	20.9	0
116	2012-08-04	300	217	0	0	2.1	12.5	100	12.5	1.2	244	20.9	0
116	2012-08-04	400	217	0	0	2.1	12.3	100	12.3	1.5	285	20.8	0
116	2012-08-04	500	217	0	0	2.1	12.3	100	12.3	2.2	278	20.8	0
116	2012-08-04	600	217	0	9	2.1	12.3	100	12.3	2.4	271	20.7	0
116	2012-08-04	700	217	0	52	1.9	12.5	100	12.5	3.4	265	20.7	0
116	2012-08-04	800	217	0	129	1.9	12.8	100	12.8	1.4	187	20.6	0
116	2012-08-04	900	217	0	198	1.9	13.7	100	13.7	2.7	240	20.5	0
116	2012-08-04	1000	217	0	183	1.6	13.8	100	13.8	3.2	260	20.5	0
116	2012-08-04	1100	217	0	195	1.5	14.1	96	13.4	3.6	268	20.4	0
116	2012-08-04	1200	217	0	285	1.5	14.8	90	13.2	3.3	261	20.4	0
116	2012-08-04	1300	217	0	295	1.5	15.3	86	13	4.3	270	20.3	0
116	2012-08-04	1400	217	0	146	1.5	14.2	90	12.6	3.9	282	20.3	0
116	2012-08-04	1500	217	0	109	1.5	14.5	89	12.7	3.5	289	20.3	0
116	2012-08-04	1600	217	0	82	1.5	14.5	91	13.1	3.1	288	20.3	0
116	2012-08-04	1700	217	0	62	1.5	14.6	93	13.4	2.6	274	20.3	0
116	2012-08-04	1800	217	0	47	1.5	14.8	90	13.2	2.3	315	20.3	0
116	2012-08-04	1900	217	0	12	1.5	14.5	92	13.3	2.8	296	20.4	0
116	2012-08-04	2000	217	0	0	1.5	14.3	95	13.5	2.2	287	20.4	0
116	2012-08-04	2100	217	0	0	1.5	14.3	95	13.5	2.2	280	20.4	0
116	2012-08-04	2200	217	0	0	1.6	14.2	96	13.6	1.9	276	20.3	0
116	2012-08-04	2300	217	0	0	1.6	14.2	99	14.1	2.3	275	20.3	0
116	2012-08-04	2400	217	0	0	1.8	13.8	100	13.8	1.8	287	20.3	0
116	2012-08-05	100	218	0	0	1.9	13.7	100	13.7	1.5	250	20.2	0
116	2012-08-05	200	218	0	0	1.9	13.5	100	13.5	2.2	259	20.2	0
116	2012-08-05	300	218	0	0	2.1	13.3	100	13.3	1.4	283	20.2	0
116	2012-08-05	400	218	0	0	2.1	13.4	100	13.4	1.2	329	20.1	0
116	2012-08-05	500	218	0	0	2.2	13.4	100	13.4	0.9	90	20.1	0
116	2012-08-05	600	218	0	7	2.2	13.5	100	13.5	1.8	214	20	0
116	2012-08-05	700	218	0	41	2.2	13.3	100	13.3	2.1	235	19.9	0
116	2012-08-05	800	218	0	88	2.1	13.6	100	13.6	2	250	19.9	0
116	2012-08-05	900	218	0	160	2	13.9	100	13.9	1.5	272	19.9	0
116	2012-08-05	1000	218	0	186	1.7	14.7	100	14.7	1.8	310	19.8	0
116	2012-08-05	1100	218	0	302	1.6	15.8	86	13.5	2.1	293	19.8	0
116	2012-08-05	1200	218	0	465	1.6	16.5	84	13.8	3.1	280	19.8	0
116	2012-08-05	1300	218	0	572	1.6	17	82	13.9	3.9	293	19.8	0
116	2012-08-05	1400	218	0	727	1.6	17.5	79	13.8	4.5	297	19.8	0
116	2012-08-05	1500	218	0	732	1.6	17.7	79	13.9	4.7	292	19.9	0
116	2012-08-05	1600	218	0	572	1.6	17.4	78	13.5	4.8	297	19.9	0
116	2012-08-05	1700	218	0	404	1.5	16.9	78	13.1	4.8	285	20	0
116	2012-08-05	1800	218	0	241	1.4	16.3	77	12.3	4.5	288	20.1	0
116	2012-08-05	1900	218	0	66	1.4	15	82	12	3.5	281	20.2	0
116	2012-08-05	2000	218	0	1	1.4	13.4	90	11.8	1.6	267	20.3	0
116	2012-08-05	2100	218	0	0	1.4	12.7	93	11.6	1.2	235	20.4	0
116	2012-08-05	2200	218	0	0	1.4	12.4	96	11.7	1.2	213	20.5	0
116	2012-08-05	2300	218	0	0	1.4	12.3	98	12	1.4	137	20.5	0
116	2012-08-05	2400	218	0	0	1.5	11.8	100	11.8	1.5	179	20.5	0
116	2012-08-06	100	219	0	0	1.6	11.3	100	11.3	1.3	168	20.5	0
116	2012-08-06	200	219	0	0	1.6	10.8	100	10.8	1	72	20.4	0
116	2012-08-06	300	219	0	0	1.9	12.1	100	12.1	1.6	167	20.3	0
116	2012-08-06	400	219	0	0	2	12.4	100	12.4	1.4	208	20.2	0
116	2012-08-06	500	219	0	0	1.9	12.1	100	12.1	1.7	169	20.1	0
116	2012-08-06	600	219	0	10	1.9	12	100	12	1.4	155	20	0
116	2012-08-06	700	219	0	57	2	11.9	100	11.9	1.2	154	19.9	0
116	2012-10-16	1200	290	0	630	1.9	22.7	68	16.4	4.5	266	16.8	1
116	2012-10-16	1300	290	0	617	1.9	21.9	72	16.5	5.5	277	16.8	1
116	2012-10-16	1400	290	0	549	1.8	20.4	77	16.3	5.3	271	16.9	1
116	2012-10-16	1500	290	0	437	1.9	20	79	16.3	4.7	280	16.9	1
116	2012-10-16	1600	290	0	284	1.8	19.9	78	16	4.2	258	16.9	1
116	2012-10-16	1700	290	0	112	1.7	18.8	79	15.1	3.7	230	17	1
116	2012-10-16	1800	290	0	5	1.6	17.6	82	14.4	3.1	221	17.1	1
116	2012-10-16	1900	290	0	0	1.6	16.6	83	13.7	3.3	226	17.2	1
116	2012-10-16	2000	290	0	0	1.5	15.4	86	13	3.8	246	17.2	1
116	2012-10-16	2100	290	0	0	1.5	14.4	90	12.8	1.7	266	17.3	1
116	2012-10-16	2200	290	0	0	1.4	13.6	91	12.1	1	20	17.3	1
116	2012-10-16	2300	290	0	0	1.4	13.5	93	12.3	1.2	13	17.3	1
116	2012-10-16	2400	290	0	0	1.4	12.5	94	11.5	0.9	198	17.4	1
116	2012-10-17	100	291	0	0	1.3	11.2	95	10.5	1.2	130	17.3	1
116	2012-10-17	200	291	0	0	1.3	11.1	96	10.6	1.1	100	17.3	1
116	2012-10-17	300	291	0	0	1.3	10.9	97	10.3	1.6	119	17.3	1
116	2012-10-17	400	291	0	0	1.2	10.8	96	10.2	1.8	126	17.2	1
116	2012-10-17	500	291	0	0	1.3	11	97	10.4	1.9	120	17.2	1
116	2012-10-17	600	291	0	0	1.3	11.3	97	10.8	1.1	58	17.1	1
116	2012-10-17	700	291	0	50	1.3	10.7	97	10.3	1.5	139	17.1	1
116	2012-10-17	800	291	0	219	1.5	14	94	13	1.9	147	17	1
116	2012-10-17	900	291	0	386	1.6	18.9	75	14.3	2.7	141	17	1
116	2012-10-17	1000	291	0	531	1	24.8	31	6.6	4.3	51	16.9	1
116	2012-10-17	1100	291	0	633	0.8	27	23	3.8	4.5	36	16.9	1
116	2012-10-17	1200	291	0	679	0.7	29.3	18	2.7	4	48	16.8	1
116	2012-10-17	1300	291	0	663	1	28.7	26	7.4	5.1	334	16.8	1
116	2012-10-17	1400	291	0	583	1.6	23.2	56	13.9	6	293	16.8	1
116	2012-10-17	1500	291	0	457	1.4	23.6	47	11.5	5.2	308	16.9	1
116	2012-10-17	1600	291	0	294	1.5	21.7	58	13	4.5	298	16.9	1
116	2012-10-17	1700	291	0	115	1.5	19	69	13.2	3.8	293	17	1
116	2012-10-17	1800	291	0	5	1.5	16.5	78	12.7	1.6	292	17.1	1
116	2012-10-17	1900	291	0	0	1.4	15.1	79	11.5	1	339	17.1	1
116	2012-10-17	2000	291	0	0	1.3	14	80	10.7	1.4	52	17.2	1
116	2012-10-17	2100	291	0	0	1.3	13.4	84	10.7	1.5	80	17.2	1
116	2012-10-17	2200	291	0	0	1.2	12.3	85	9.8	1.8	170	17.3	1
116	2012-10-17	2300	291	0	0	1.2	12.3	83	9.4	2.6	124	17.3	1
116	2012-10-17	2400	291	0	0	1.1	12.6	76	8.5	2.1	114	17.3	1
116	2012-10-18	100	292	0	0	1	13	68	7.1	2.3	119	17.2	1
116	2012-10-18	200	292	0	0	1	15.1	56	6.5	3.7	125	17.2	1
116	2012-10-18	300	292	0	0	0.9	17	49	6.1	3.9	112	17.1	1
116	2012-10-18	400	292	0	0	0.9	16.6	48	5.5	3.7	108	17.1	1
116	2012-10-18	500	292	0	0	0.9	15.8	50	5.4	3.4	110	17	1
116	2012-10-18	600	292	0	0	0.9	15.9	50	5.5	3.1	110	17	1
116	2012-10-18	700	292	0	42	0.9	15.8	52	6	2.9	120	16.9	1
116	2012-10-18	800	292	0	203	1	19.1	45	6.9	3.1	128	16.9	1
116	2012-10-18	900	292	0	369	1.1	22.5	39	7.8	4.1	139	16.8	1
116	2012-10-18	1000	292	0	510	1.2	25.1	37	9.3	4.1	152	16.8	1
116	2012-10-18	1100	292	0	606	1.2	27.6	34	10.1	2.3	133	16.8	1
116	2012-10-18	1200	292	0	649	1.2	27.8	32	9.7	5.1	333	16.7	1
116	2012-10-18	1300	292	0	633	1.4	26.9	39	11.8	5.7	356	16.7	1
116	2012-10-18	1400	292	0	556	1.6	26.4	45	13.6	5.4	350	16.8	1
116	2012-10-18	1500	292	0	432	1.7	26	50	14.7	5.8	350	16.8	1
116	2012-10-18	1600	292	0	270	1.9	23.5	66	16.7	7.6	13	16.9	1
116	2012-10-18	1700	292	0	100	1.9	21.4	74	16.5	6.7	3	17	1
116	2012-10-18	1800	292	0	4	1.8	19.6	80	16.1	5.5	12	17	1
116	2012-10-18	1900	292	0	0	1.8	18.4	85	15.8	5.2	14	17.1	1
116	2012-10-18	2000	292	0	0	1.8	17.4	90	15.7	4.3	2	17.2	1
116	2012-10-18	2100	292	0	0	1.8	17.3	91	15.9	4.1	9	17.3	1
116	2012-10-18	2200	292	0	0	1.8	16.9	93	15.7	3.2	356	17.3	1
116	2012-10-18	2300	292	0	0	1.7	16.1	94	15.2	3.5	4	17.4	1
116	2012-10-18	2400	292	0	0	1.8	16.2	96	15.5	2.8	349	17.4	1
116	2012-10-19	100	293	0	0	1.8	16.4	96	15.7	2.3	332	17.4	1
116	2012-10-19	200	293	0	0	1.7	15.6	96	15	1.4	253	17.4	1
116	2012-10-19	300	293	0	0	1.7	15.6	98	15.2	1.3	227	17.4	1
116	2012-10-19	400	293	0	0	1.8	15.9	99	15.7	1.2	278	17.4	1
116	2012-10-19	500	293	0	0	1.8	16	99	15.9	1.3	265	17.4	1
116	2012-10-19	600	293	0	0	1.8	16.1	100	16	1.3	233	17.4	1
116	2012-10-19	700	293	0	9	1.9	16.3	100	16.3	1.6	178	17.4	1
116	2012-10-19	800	293	0	45	1.9	16.8	100	16.8	1	247	17.4	1
116	2012-10-19	900	293	0	89	2	17.3	99	17.1	1.9	312	17.4	1
116	2012-10-19	1000	293	0	171	2	17.9	97	17.3	1.1	319	17.4	1
116	2012-10-19	1100	293	0	279	2	19	91	17.5	1.6	301	17.4	1
116	2012-10-19	1200	293	0	543	2	19.9	86	17.5	3.2	299	17.4	1
116	2012-10-19	1300	293	0	545	2	19.8	84	17.1	4.5	302	17.4	1
116	2012-10-19	1400	293	0	414	1.9	19.1	86	16.6	4.4	307	17.5	1
116	2012-10-19	1500	293	0	166	1.8	18.1	89	16.2	4.6	304	17.5	1
116	2012-10-19	1600	293	0	70	1.8	17.2	91	15.7	3.9	293	17.5	1
116	2012-10-19	1700	293	0	22	1.7	16.3	93	15.3	3	293	17.6	1
116	2012-10-19	1800	293	0	1	1.7	15.4	96	14.7	2.5	279	17.6	1
116	2012-10-19	1900	293	0	0	1.6	14.8	97	14.4	2.5	279	17.7	1
116	2012-10-19	2000	293	0	0	1.6	14.4	98	14.1	2.1	264	17.7	1
116	2012-10-19	2100	293	0	0	1.6	14.3	98	14	2.2	255	17.8	1
116	2012-10-19	2200	293	0	0	1.6	13.9	98	13.7	2	260	17.8	1
116	2012-10-19	2300	293	0	0	1.5	13.5	98	13.3	1.9	243	17.8	1
116	2012-10-19	2400	293	0	0	1.5	13.3	98	13	1.5	227	17.8	1
116	2012-10-20	100	294	0	0	1.5	13.4	99	13.1	1.9	222	17.7	1
116	2012-10-20	200	294	0	0	1.5	13.5	99	13.3	1.1	177	17.7	1
116	2012-10-20	300	294	0	0	1.6	13.7	99	13.6	1.4	189	17.7	1
116	2012-10-20	400	294	0	0	1.6	13.7	100	13.6	2.2	241	17.7	1
116	2012-10-20	500	294	0	0	1.6	13.7	100	13.7	1.8	221	17.6	1
116	2012-10-20	600	294	0	0	1.6	13.6	100	13.6	2	249	17.6	1
116	2012-10-20	700	294	0	10	1.5	13.5	100	13.5	2	235	17.6	1
116	2012-10-20	800	294	0	54	1.6	13.6	100	13.6	1.5	197	17.6	1
116	2012-10-20	900	294	0	102	1.6	13.9	100	13.9	1.4	228	17.5	1
116	2012-10-20	1000	294	0	110	1.6	14.2	99	14.1	2.4	259	17.5	1
116	2012-10-20	1100	294	0	127	1.6	14.6	96	14	2.7	249	17.5	1
116	2012-10-20	1200	294	0	161	1.6	14.8	93	13.7	4.2	255	17.4	1
116	2012-10-20	1300	294	0	200	1.5	15.4	88	13.5	4.6	264	17.4	1
116	2012-10-20	1400	294	0	227	1.5	15.7	86	13.3	5	263	17.4	1
116	2012-10-20	1500	294	0	346	1.5	16.4	81	13.2	4.7	258	17.4	1
116	2012-10-20	1600	294	0	271	1.5	16.9	77	12.9	5	254	17.4	1
116	2012-10-20	1700	294	0	97	1.4	15.7	79	12.1	4.9	249	17.4	1
116	2012-10-20	1800	294	0	3	1.3	14.1	82	11	5.2	233	17.4	1
116	2012-10-20	1900	294	0	0	1.3	13.1	84	10.5	4.5	232	17.4	1
116	2012-10-20	2000	294	0	0	1.2	12.3	85	9.8	4.1	233	17.4	1
116	2012-10-20	2100	294	0	0	1.2	11.6	86	9.2	3.7	234	17.4	1
116	2012-10-20	2200	294	0	0	1.1	11.1	87	8.9	3.9	228	17.4	1
116	2012-10-20	2300	294	0	0	1.1	10.2	88	8.4	3	212	17.3	1
116	2012-10-20	2400	294	0	0	1.1	9.7	89	7.9	2.3	194	17.3	1
116	2012-10-21	100	295	0	0	1	8.9	89	7.2	2.4	171	17.3	1
116	2012-10-21	200	295	0	0	1	8.5	90	7	2.1	182	17.2	1
116	2012-10-21	300	295	0	0	1	8.5	90	6.9	2.4	177	17.1	1
116	2012-10-21	400	295	0	0	1	8.2	91	6.9	2.4	178	17.1	1
116	2012-10-21	500	295	0	0	1	7.9	92	6.8	2.2	185	17	1
116	2012-10-21	600	295	0	0	1	8	92	6.8	2	191	16.9	1
116	2012-10-21	700	295	0	40	1	8	91	6.7	2.3	178	16.9	1
116	2012-10-21	800	295	0	246	1.1	11.3	85	8.9	2.7	194	16.8	1
116	2012-10-21	900	295	0	319	1.2	13.6	74	9.1	3.3	243	16.7	1
116	2012-10-21	1000	295	0	455	1.1	14.5	69	8.9	4	282	16.7	1
116	2012-10-21	1100	295	0	568	1.1	15.1	66	8.8	4.9	279	16.6	1
116	2012-10-21	1200	295	0	639	1.2	15.4	66	9	3.7	285	16.6	1
116	2012-10-21	1300	295	0	609	1.1	16	63	8.9	4.8	276	16.5	1
116	2012-10-21	1400	295	0	551	1.1	15.9	62	8.7	5.2	286	16.5	1
116	2012-10-21	1500	295	0	390	1.1	15.6	62	8.3	5.1	289	16.5	1
116	2012-10-21	1600	295	0	232	1.1	15.1	63	8.2	4.7	283	16.5	1
116	2012-10-21	1700	295	0	55	1.1	14.3	68	8.5	4	269	16.6	1
116	2012-10-21	1800	295	0	1	1.1	13.2	73	8.5	2.8	245	16.6	1
116	2012-10-21	1900	295	0	0	1.1	12.7	77	8.7	2.5	213	16.6	1
116	2012-10-21	2000	295	0	0	1.1	12.5	77	8.6	3	197	16.7	1
116	2012-10-21	2100	295	0	0	1.1	12.1	78	8.4	2.6	206	16.7	1
116	2012-10-21	2200	295	0	0	1.1	12.2	77	8.2	2.4	197	16.7	1
116	2012-10-21	2300	295	0	0	1.2	12.7	80	9.3	3	252	16.7	1
116	2012-10-21	2400	295	0	0	1.2	12.6	82	9.6	1.9	238	16.7	1
116	2012-10-22	100	296	0	0	1.2	12	87	9.9	1.2	136	16.6	1
116	2012-10-22	200	296	0	0	1.2	12.1	88	10.1	1.1	138	16.6	1
116	2012-10-22	300	296	0	0	1.3	12.1	90	10.5	1.5	154	16.6	1
116	2012-10-22	400	296	0	0	1.3	12	90	10.3	2.5	150	16.5	1
116	2012-10-22	500	296	0	0	1.2	11.8	87	9.8	4.4	153	16.5	1
116	2012-10-22	600	296	0	0	1.1	11.4	85	9	4.9	151	16.5	1
116	2012-10-22	700	296	0	11	1.1	12	79	8.5	6.3	161	16.5	1
116	2012-10-22	800	296	0	56	1.2	12.3	82	9.4	5	155	16.4	1
116	2012-10-22	900	296	0	126	1.2	13.8	79	10.3	5.5	159	16.4	1
116	2012-10-22	1000	296	0	105	1.3	14.4	82	11.4	4.2	184	16.4	1
116	2012-10-22	1100	296	0	177	1.5	13.8	92	12.6	6	249	16.3	1
116	2012-10-22	1200	296	0	309	1.4	14.3	86	12	6.8	271	16.3	1
116	2012-10-22	1300	296	0	646	1.4	15.5	81	12.2	6.4	277	16.3	1
116	2012-10-22	1400	296	0	559	1.3	16.1	73	11.3	5.6	281	16.3	1
116	2012-10-22	1500	296	0	426	1.4	16.2	74	11.5	4.4	277	16.2	1
116	2012-10-22	1600	296	0	271	1.4	15.8	75	11.4	4.4	272	16.2	1
116	2012-10-22	1700	296	0	101	1.3	15.1	78	11.4	4	267	16.3	1
116	2012-10-22	1800	296	0	2	1.3	13.4	82	10.3	2.2	245	16.3	1
116	2012-10-22	1900	296	0	0	1.2	11.9	88	10	1.5	194	16.3	1
116	2012-10-22	2000	296	0	0	1.2	10.6	90	9.1	1.9	158	16.4	1
116	2012-10-22	2100	296	0	0	1.1	10	90	8.4	2	147	16.4	1
116	2012-10-22	2200	296	0	0	1.1	10	90	8.3	1.8	159	16.4	1
116	2012-10-22	2300	296	0	0	1.1	10.7	89	8.9	2.2	156	16.4	1
116	2012-10-22	2400	296	0	0	1.1	11	83	8.3	4.1	157	16.4	1
116	2012-10-23	100	297	0	0	1	10.7	81	7.7	3.2	172	16.3	1
116	2012-10-23	200	297	0	0	1.1	10.2	84	7.7	3.4	161	16.3	1
116	2012-10-23	300	297	0	0	1.1	10.4	85	8	3.8	160	16.3	1
116	2012-10-23	400	297	0	0	1.1	9.8	90	8.2	3.5	158	16.3	1
116	2012-10-23	500	297	0	0	1.1	9.4	91	8	4.2	144	16.3	1
116	2012-10-23	600	297	0	0	1	8.9	92	7.6	4.4	141	16.3	1
116	2012-10-23	700	297	0	17	1	9.3	88	7.4	3.4	154	16.2	1
116	2012-10-23	800	297	0	118	1.1	10	88	8.1	3.1	152	16.2	1
116	2012-10-23	900	297	0	324	1.2	12.4	82	9.5	3.6	161	16.3	1
116	2012-10-23	1000	297	0	328	1.2	13.8	77	9.7	2.8	158	16.2	1
116	2012-10-23	1100	297	0	588	1.2	15.6	68	9.6	1.4	219	16	1
116	2012-10-23	1200	297	0	473	1.1	16	61	8.4	1.9	304	16	1
116	2012-10-23	1300	297	0	289	0.8	11.8	60	4.3	3.3	304	11.9	1
116	2012-10-23	1400	297	0	408	1.1	15.6	61	8.2	4.4	305	15.9	1
116	2012-10-23	1500	297	0	453	1.1	15.9	58	7.7	4.5	299	15.9	1
116	2012-10-23	1600	297	0	234	1	15.2	61	7.7	4.3	289	15.9	1
116	2012-10-23	1700	297	0	124	1.1	14.3	68	8.4	3.9	302	16	1
116	2012-10-23	1800	297	0	5	1.1	12.2	78	8.5	1.8	290	16	1
116	2012-10-23	1900	297	0	0	1.1	10.6	82	7.7	1	173	16.1	1
116	2012-10-23	2000	297	0	0	1	9.2	87	7.1	1.8	168	16.2	1
116	2012-10-23	2100	297	0	0	1	8.7	87	6.6	1.8	163	16.4	1
116	2012-10-23	2200	297	0	0	1	8	89	6.3	1.6	132	16.5	1
116	2012-10-23	2300	297	0	0	0.9	7.5	89	5.8	1.5	118	16.4	1
116	2012-10-23	2400	297	0	0	0.9	6.7	92	5.5	1.7	119	16.3	1
116	2012-10-24	100	298	0	0	0.9	6.4	92	5.2	1.8	119	16.3	1
116	2012-10-24	200	298	0	0	0.9	7	91	5.6	2	136	16.3	1
116	2012-10-24	300	298	0	0	0.9	6.5	92	5.3	2	143	16.2	1
116	2012-10-24	400	298	0	0	0.9	5.9	94	5	2.1	135	16	1
116	2012-10-24	500	298	0	0	0.9	6.2	92	5.1	2.5	151	15.9	1
116	2012-10-24	600	298	0	0	0.9	7.3	86	5.2	4	153	15.8	1
116	2012-10-24	700	298	0	12	0.9	7.8	83	5.1	3.9	162	15.7	1
116	2012-10-24	800	298	0	102	0.9	8.2	83	5.4	5.1	147	15.6	1
116	2012-10-24	900	298	0	195	0.9	9.8	78	6.1	6.3	147	15.5	1
116	2012-10-24	1000	298	0	309	1	12.5	70	7.2	5.4	150	15.4	1
116	2012-10-24	1100	298	0	500	1.1	15.4	63	8.4	3.6	140	15.3	1
116	2012-10-24	1200	298	0	472	1.2	17.1	63	9.9	2.1	220	15.3	1
116	2012-10-24	1300	298	0	495	1.4	17.5	68	11.6	4.1	295	15.2	1
116	2012-10-24	1400	298	0	538	1.4	18	65	11.4	4.5	292	15.2	1
116	2012-10-24	1500	298	0	433	1.4	17.7	68	11.6	4.1	306	15.3	1
116	2012-10-24	1600	298	0	280	1.4	17	70	11.6	3.9	295	15.3	1
116	2012-10-24	1700	298	0	110	1.4	16	75	11.6	3	306	15.4	1
116	2012-10-24	1800	298	0	3	1.3	14	84	11.4	2	298	15.4	1
116	2012-10-24	1900	298	0	0	1.3	12.9	87	10.8	1	72	15.6	1
116	2012-10-24	2000	298	0	0	1.3	12.5	88	10.5	1.1	168	16.2	1
116	2012-10-24	2100	298	0	0	1.3	12.4	88	10.5	1.2	112	16.5	1
116	2012-10-24	2200	298	0	0	1.2	11.9	87	9.9	1.1	168	16.7	1
116	2012-10-24	2300	298	0	0	1.2	12.4	85	10	1.5	89	16.8	1
116	2012-10-24	2400	298	0	0	1.2	12.6	85	10.2	1	82	16.8	1
116	2012-10-25	100	299	0	0	1.2	12.2	87	10.1	1.1	204	16.7	1
116	2012-10-25	200	299	0	0	1.2	12.1	85	9.7	1.2	124	16.6	1
116	2012-10-25	300	299	0	0	1.2	12.2	86	10	0.9	74	16.5	1
116	2012-10-25	400	299	0	0	1.2	12.4	85	10	1.5	130	16.4	1
116	2012-10-25	500	299	0	0	1.2	12.8	83	10	2.4	123	16.1	1
116	2012-10-25	600	299	0	0	1.2	13.2	80	9.8	2.3	109	15.9	1
116	2012-10-25	700	299	0	10	1.2	13.3	79	9.7	1.1	141	15.8	1
116	2012-10-25	800	299	0	53	1.2	13.7	77	9.7	1.8	134	15.8	1
116	2012-10-25	900	299	0	140	1.2	14.9	68	9	2.4	145	15.8	1
116	2012-10-25	1000	299	0	311	1.1	16.2	61	8.8	2.4	112	15.7	1
116	2012-10-25	1100	299	0	443	1.2	17.8	61	10.2	2	68	15.7	1
116	2012-10-25	1200	299	0	645	1.3	19.8	58	11.2	2.2	52	15.8	1
116	2012-10-25	1300	299	0	573	1.4	20.8	58	12.2	3	10	15.7	1
116	2012-10-25	1400	299	0	535	1.5	21.4	57	12.6	4.2	36	15.7	1
116	2012-10-25	1500	299	0	420	1.5	20.8	61	13	4.3	350	15.8	1
116	2012-10-25	1600	299	0	272	1.5	18.6	72	13.5	5.2	311	15.8	1
116	2012-10-25	1700	299	0	105	1.5	16.9	77	12.8	4.1	320	15.9	1
116	2012-10-25	1800	299	0	4	1.4	15.5	81	12.2	1.8	311	16	1
116	2012-10-25	1900	299	0	0	1.3	14.1	82	11.1	1.1	232	16.2	1
116	2012-10-25	2000	299	0	0	1.3	13	85	10.6	1.1	200	16.6	1
116	2012-10-25	2100	299	0	0	1.2	12.2	86	10	1.2	217	16.9	1
116	2012-10-25	2200	299	0	0	1.2	12.5	82	9.4	1.8	110	17	1
116	2012-10-25	2300	299	0	0	1	12.3	73	7.5	1.7	54	17.1	1
116	2012-10-25	2400	299	0	0	1	12	72	7.1	2.9	73	17	1
116	2012-10-26	100	300	0	0	1	12.1	69	6.6	3	67	16.8	1
116	2012-10-26	200	300	0	0	1	11.7	71	6.6	3.5	56	16.6	1
116	2012-10-26	300	300	0	0	1	10.9	74	6.3	2.7	85	16.4	1
116	2012-10-26	400	300	0	0	0.9	10	74	5.6	1.9	74	16.6	1
116	2012-10-26	500	300	0	0	0.9	9.8	74	5.3	2.2	87	16.7	1
116	2012-10-26	600	300	0	0	0.9	10	73	5.4	2.7	92	16.5	1
116	2012-10-26	700	300	0	18	0.9	8.7	80	5.4	1.7	140	16.3	1
89	2012-07-27	1200	209	0	922	1.4	19	65	12.2	0.4	323	26.1	0
89	2012-07-27	1300	209	0	928	1.4	19.7	61	12.1	4.1	317	26.1	0
89	2012-07-27	1400	209	0	880	1.4	19.3	62	11.9	6.2	321	26.2	0
89	2012-07-27	1500	209	0	777	1.4	19.2	65	12.4	6.3	324	26.3	0
89	2012-07-27	1600	209	0	628	1.5	18.6	68	12.6	3.5	328	26.5	0
89	2012-07-27	1700	209	0	447	1.4	17.6	72	12.5	0.4	328	26.8	0
89	2012-07-27	1800	209	0	263	1.4	16.3	77	12.3	3.1	329	27.1	0
89	2012-07-27	1900	209	0	60	1.4	14.7	84	12	4.7	321	27.3	0
89	2012-07-27	2000	209	0	1	1.4	14.1	87	12	0.4	314	27.5	0
89	2012-07-27	2100	209	0	0	1.4	13.2	90	11.6	0.4	324	27.6	0
89	2012-07-27	2200	209	0	0	1.4	12.7	93	11.7	0.4	327	27.6	0
89	2012-07-27	2300	209	0	0	1.4	12.7	94	11.7	0.4	318	27.6	0
89	2012-07-27	2400	209	0	0	1.4	12.4	95	11.6	0.4	333	27.6	0
89	2012-07-28	100	210	0	0	1.4	12.2	95	11.5	0.4	332	27.5	0
89	2012-07-28	200	210	0	0	1.3	12	95	11.3	0.4	300	27.4	0
89	2012-07-28	300	210	0	0	1.3	11.9	95	11.1	0.4	319	27.3	0
89	2012-07-28	400	210	0	0	1.3	11.7	95	11	0.4	355	27.2	0
89	2012-07-28	500	210	0	0	1.3	11.5	95	10.8	0.4	321	27.1	0
89	2012-07-28	600	210	0	11	1.3	11.5	94	10.7	0.4	328	26.9	0
89	2012-07-28	700	210	0	63	1.3	11.6	93	10.6	0.4	330	26.8	0
89	2012-07-28	800	210	0	120	1.3	12.1	91	10.7	0.4	301	26.6	0
89	2012-07-28	900	210	0	250	1.3	13	86	10.8	0.4	315	26.5	0
89	2012-07-28	1000	210	0	538	1.4	14.8	81	11.5	0.6	302	26.4	0
89	2012-07-28	1100	210	0	832	1.4	16.4	76	12.2	1	310	26.3	0
89	2012-07-28	1200	210	0	904	1.4	17.4	72	12.3	1.9	314	26.2	0
89	2012-07-28	1300	210	0	909	1.4	17.7	70	12.1	0.4	319	26.1	0
89	2012-07-28	1400	210	0	862	1.4	18.5	67	12.3	0.4	324	26.2	0
89	2012-07-28	1500	210	0	760	1.5	18.8	67	12.6	0.4	331	26.3	0
89	2012-07-28	1600	210	0	614	1.4	17.9	71	12.5	0.4	331	26.5	0
89	2012-07-28	1700	210	0	436	1.4	17	74	12.4	0.4	331	26.7	0
89	2012-07-28	1800	210	0	246	1.4	15.5	80	12.2	4.7	322	27	0
89	2012-07-28	1900	210	0	44	1.4	14	87	11.9	3.6	314	27.2	0
89	2012-07-28	2000	210	0	1	1.4	13.4	90	11.7	0.4	314	27.3	0
89	2012-07-28	2100	210	0	0	1.4	13.3	90	11.6	0.4	324	27.4	0
89	2012-07-28	2200	210	0	0	1.4	13.1	91	11.6	0.4	322	27.5	0
89	2012-07-28	2300	210	0	0	1.4	12.8	92	11.5	0.4	328	27.5	0
89	2012-07-28	2400	210	0	0	1.4	12.7	92	11.5	0.4	318	27.4	0
89	2012-07-29	100	211	0	0	1.4	12.7	93	11.6	0.4	316	27.3	0
89	2012-07-29	200	211	0	0	1.4	12.5	94	11.5	0.4	306	27.2	0
89	2012-07-29	300	211	0	0	1.3	12.3	94	11.2	0.4	306	27.1	0
89	2012-07-29	400	211	0	0	1.3	11.9	94	10.9	0.4	307	27	0
89	2012-07-29	500	211	0	0	1.3	11.7	93	10.6	0.4	306	26.8	0
89	2012-07-29	600	211	0	11	1.3	11.6	95	10.8	0.4	319	26.7	0
89	2012-07-29	700	211	0	59	1.3	11.6	94	10.7	0.4	305	26.5	0
89	2012-07-29	800	211	0	111	1.3	12.1	93	10.9	0.4	318	26.4	0
89	2012-07-29	900	211	0	211	1.3	13.1	89	11.3	0.4	324	26.3	0
89	2012-07-29	1000	211	0	433	1.4	14.5	83	11.7	0.8	322	26.1	0
89	2012-07-29	1100	211	0	850	1.4	16.3	77	12.3	4.2	319	26	0
89	2012-07-29	1200	211	0	917	1.5	18	70	12.5	5	319	25.9	0
89	2012-07-29	1300	211	0	925	1.5	19	67	12.6	5.6	316	25.9	0
89	2012-07-29	1400	211	0	875	1.5	18.7	67	12.6	6.4	326	25.9	0
89	2012-07-29	1500	211	0	776	1.4	18.1	69	12.4	6.9	326	26	0
89	2012-07-29	1600	211	0	629	1.4	17.3	73	12.3	7.1	326	26.2	0
89	2012-07-29	1700	211	0	444	1.4	15.7	78	12	7	323	26.4	0
89	2012-07-29	1800	211	0	180	1.4	14.1	85	11.6	5.8	317	26.7	0
89	2012-07-29	1900	211	0	29	1.4	13.2	89	11.5	0.4	320	26.9	0
89	2012-07-29	2000	211	0	1	1.3	12.6	92	11.4	0.4	309	27.1	0
89	2012-07-29	2100	211	0	0	1.4	12.4	94	11.5	0.4	322	27.2	0
89	2012-07-29	2200	211	0	0	1.4	12.3	95	11.5	0.4	323	27.2	0
89	2012-07-29	2300	211	0	0	1.4	12.3	95	11.5	0.4	327	27.2	0
89	2012-07-29	2400	211	0	0	1.4	12.2	96	11.5	0.4	327	27.2	0
89	2012-07-30	100	212	0	0	1.3	12	96	11.4	0.4	340	27.1	0
89	2012-07-30	200	212	0	0	1.3	11.8	97	11.2	0.4	328	27	0
89	2012-07-30	300	212	0	0	1.3	11.6	97	11.1	0.4	352	26.9	0
89	2012-07-30	400	212	0	0	1.3	11.4	97	11	0.4	256	26.8	0
89	2012-07-30	500	212	0	0	1.3	11.2	98	10.8	0.4	69	26.7	0
89	2012-07-30	600	212	0	10	1.3	11.1	98	10.8	0.4	109	26.5	0
89	2012-07-30	700	212	0	55	1.3	11.3	98	11	0.4	160	26.4	0
89	2012-07-30	800	212	0	176	1.3	11.7	98	11.4	0.4	154	26.3	0
89	2012-07-30	900	212	0	579	1.5	13.8	93	12.8	1.4	188	26.1	0
89	2012-07-30	1000	212	0	741	1.5	17.3	75	12.9	1.3	211	26	0
89	2012-07-30	1100	212	0	854	1.5	20.5	62	13	2.6	325	25.9	0
89	2012-07-30	1200	212	0	907	1.6	22.5	58	13.7	4.4	311	25.8	0
89	2012-07-30	1300	212	0	920	1.6	22.2	60	14	5.5	315	25.8	0
89	2012-07-30	1400	212	0	870	1.5	21	62	13.5	6.5	319	25.9	0
89	2012-07-30	1500	212	0	771	1.5	20.3	64	13.3	7.2	325	26.1	0
89	2012-07-30	1600	212	0	623	1.5	19.3	67	13.1	6.9	326	26.4	0
89	2012-07-30	1700	212	0	447	1.5	18.2	70	12.6	6.3	323	26.7	0
89	2012-07-30	1800	212	0	256	1.4	16.9	75	12.5	5.8	323	27	0
89	2012-07-30	1900	212	0	77	1.4	15.4	81	12.2	5	326	27.2	0
89	2012-07-30	2000	212	0	1	1.4	13.1	90	11.5	3.5	306	27.4	0
89	2012-07-30	2100	212	0	0	1.3	12.2	94	11.3	0.8	306	27.5	0
89	2012-07-30	2200	212	0	0	1.3	12.1	95	11.3	0.4	323	27.6	0
89	2012-07-30	2300	212	0	0	1.3	11.9	96	11.2	0.4	331	27.6	0
89	2012-07-30	2400	212	0	0	1.3	11.7	96	11	0.4	325	27.6	0
89	2012-07-31	100	213	0	0	1.3	11.5	96	10.8	0.4	322	27.5	0
89	2012-07-31	200	213	0	0	1.3	11.8	97	11.3	0.4	341	27.3	0
89	2012-07-31	300	213	0	0	1.3	11.7	98	11.4	0.4	320	27.2	0
89	2012-07-31	400	213	0	0	1.3	11.7	98	11.4	0.4	340	27	0
89	2012-07-31	500	213	0.1	0	1.3	11.6	98	11.3	0.4	332	26.9	0
89	2012-07-31	600	213	0	10	1.3	11.5	98	11.2	0.4	319	26.7	0
89	2012-07-31	700	213	0	56	1.3	11.6	98	11.3	0.4	32	26.6	0
89	2012-07-31	800	213	0	130	1.4	11.8	98	11.5	0.4	284	26.4	0
89	2012-07-31	900	213	0	354	1.4	12.7	98	12.3	1	276	26.3	0
89	2012-07-31	1000	213	0	725	1.5	15.6	85	13.1	2.7	302	26.1	0
89	2012-07-31	1100	213	0	835	1.5	19.6	65	13	3.3	314	26	0
89	2012-07-31	1200	213	0	898	1.6	21.3	62	13.7	5	318	25.9	0
89	2012-07-31	1300	213	0	908	1.6	20.6	64	13.6	6.1	323	25.9	0
89	2012-07-31	1400	213	0	853	1.5	20.2	64	13.3	6.4	319	26	0
89	2012-07-31	1500	213	0	751	1.5	19.7	65	13.1	6.3	322	26.2	0
89	2012-07-31	1600	213	0	608	1.5	18.6	68	12.6	6.5	322	26.4	0
89	2012-07-31	1700	213	0	434	1.4	17.3	73	12.4	6.4	322	26.7	0
89	2012-07-31	1800	213	0	247	1.4	15.9	78	12.1	6.2	331	27	0
89	2012-07-31	1900	213	0	70	1.4	13.7	87	11.6	5.6	319	27.2	0
89	2012-07-31	2000	213	0	1	1.3	12.4	93	11.3	2.6	315	27.4	0
89	2012-07-31	2100	213	0	0	1.3	12	95	11.3	0.4	311	27.5	0
89	2012-07-31	2200	213	0	0	1.3	11.8	96	11.1	0.4	301	27.6	0
89	2012-07-31	2300	213	0	0	1.3	11.8	96	11.2	0.4	318	27.6	0
89	2012-07-31	2400	213	0	0	1.3	11.8	96	11.2	0.4	314	27.5	0
89	2012-08-01	100	214	0	0	1.3	11.7	96	11.1	0.4	8	27.4	0
89	2012-08-01	200	214	0	0	1.3	11.6	96	11	0.4	126	27.3	0
89	2012-08-01	300	214	0	0	1.3	11.3	96	10.7	0.4	141	27.2	0
89	2012-08-01	400	214	0	0	1.3	11.2	96	10.7	0.4	171	27.1	0
89	2012-08-01	500	214	0	0	1.3	10.9	97	10.3	0.4	104	26.9	0
89	2012-08-01	600	214	0	10	1.2	10.7	97	10.3	0.4	76	26.8	0
89	2012-08-01	700	214	0	55	1.2	10.7	97	10.2	0.4	12	26.6	0
89	2012-08-01	800	214	0	127	1.3	11.1	97	10.5	0.4	312	26.5	0
89	2012-08-01	900	214	0	360	1.3	11.9	92	10.7	1	311	26.3	0
89	2012-08-01	1000	214	0	717	1.3	15.2	77	11.2	2.7	318	26.2	0
89	2012-08-01	1100	214	0	841	1.4	18.4	65	11.7	3.3	308	26.1	0
89	2012-08-01	1200	214	0	902	1.5	20.7	60	12.7	4.1	318	26	0
89	2012-08-01	1300	214	0	907	1.5	20.8	62	13.2	5.4	316	26	0
89	2012-08-01	1400	214	0	858	1.5	19.7	64	12.8	6.2	314	26	0
89	2012-08-01	1500	214	0	752	1.5	19.1	66	12.6	6.4	317	26.2	0
89	2012-08-01	1600	214	0	606	1.5	18.5	68	12.5	0.9	319	26.4	0
89	2012-08-01	1700	214	0	430	1.4	17.1	73	12.2	0.4	319	26.7	0
89	2012-08-01	1800	214	0	241	1.4	15.7	78	11.9	3.8	320	27	0
89	2012-08-01	1900	214	0	52	1.3	13.3	87	11.2	5.8	316	27.2	0
89	2012-08-01	2000	214	0	1	1.3	12.3	94	11.3	0.8	317	27.4	0
89	2012-08-01	2100	214	0	0	1.3	11.7	96	11.1	0.4	302	27.5	0
89	2012-08-01	2200	214	0	0	1.3	11.6	97	11.1	0.4	309	27.6	0
89	2012-08-01	2300	214	0	0	1.3	11.4	98	11	0.4	324	27.6	0
89	2012-08-01	2400	214	0	0	1.3	11.2	98	10.9	0.4	305	27.5	0
89	2012-08-02	100	215	0	0	1.3	11.2	98	10.9	0.4	288	27.4	0
89	2012-08-02	200	215	0	0	1.3	11.2	98	10.9	0.4	18	27.3	0
89	2012-08-02	300	215	0	0	1.3	11.1	98	10.8	0.4	163	27.2	0
89	2012-08-02	400	215	0	0	1.3	11	98	10.7	0.4	179	27.1	0
89	2012-08-02	500	215	0	0	1.3	10.7	98	10.4	0.4	193	26.9	0
89	2012-08-02	600	215	0	9	1.3	10.9	98	10.7	0.4	157	26.8	0
89	2012-08-02	700	215	0	58	1.3	11.1	98	10.9	0.4	174	26.6	0
89	2012-08-02	800	215	0	152	1.3	11.5	98	11.3	0.4	180	26.5	0
89	2012-08-02	900	215	0	471	1.4	12.8	97	12.2	1.1	253	26.3	0
89	2012-08-02	1000	215	0	725	1.4	16.2	78	12.3	2.6	302	26.2	0
89	2012-08-02	1100	215	0	828	1.4	19.7	61	12.1	3.3	309	26.1	0
89	2012-08-02	1200	215	0	892	1.5	20.4	63	13.1	4.9	311	26	0
89	2012-08-02	1300	215	0	904	1.5	19.8	66	13.2	5.9	318	26	0
89	2012-08-02	1400	215	0	843	1.5	19.1	68	13.1	4.7	319	26.1	0
89	2012-08-02	1500	215	0	691	1.5	18	71	12.7	0.4	323	26.3	0
89	2012-08-02	1600	215	0	567	1.5	17.4	73	12.5	0.4	321	26.5	0
89	2012-08-02	1700	215	0	412	1.4	15.8	79	12.2	6.5	321	26.8	0
89	2012-08-02	1800	215	0	212	1.4	14.4	84	11.7	0.9	324	27	0
89	2012-08-02	1900	215	0	27	1.3	12.7	91	11.3	4.3	318	27.2	0
89	2012-08-02	2000	215	0	0	1.3	12.1	94	11.1	0.4	319	27.4	0
89	2012-08-02	2100	215	0	0	1.3	11.7	96	11	0.4	307	27.5	0
89	2012-08-02	2200	215	0	0	1.3	11.5	97	11	0.4	307	27.5	0
89	2012-08-02	2300	215	0	0	1.3	11.4	97	10.9	0.4	306	27.5	0
89	2012-08-02	2400	215	0	0	1.3	11.2	97	10.8	0.4	294	27.4	0
89	2012-08-03	100	216	0	0	1.3	11.1	97	10.7	0.4	306	27.4	0
89	2012-08-03	200	216	0	0	1.3	11.1	98	10.7	0.4	308	27.2	0
89	2012-08-03	300	216	0	0	1.3	11	98	10.6	0.4	306	27.1	0
89	2012-08-03	400	216	0	0	1.3	10.9	98	10.6	0.4	300	27	0
89	2012-08-03	500	216	0	0	1.3	10.9	98	10.6	0.4	286	26.9	0
89	2012-08-03	600	216	0	8	1.3	10.8	98	10.5	0.4	55	26.7	0
89	2012-08-03	700	216	0	43	1.3	11	98	10.7	0.4	134	26.6	0
89	2012-08-03	800	216	0	94	1.3	11.2	98	10.9	0.4	215	26.4	0
89	2012-08-03	900	216	0	187	1.3	11.8	97	11.4	0.4	272	26.3	0
89	2012-08-03	1000	216	0	569	1.4	13.6	89	11.8	2.1	320	26.1	0
89	2012-08-03	1100	216	0	834	1.4	16.2	78	12.4	1.8	319	26	0
89	2012-08-03	1200	216	0	896	1.5	17.6	74	12.8	0.4	323	25.9	0
89	2012-08-03	1300	216	0	892	1.5	18.4	70	12.8	0.4	319	25.8	0
89	2012-08-03	1400	216	0	841	1.5	18.6	70	13.1	0.4	324	25.9	0
89	2012-08-03	1500	216	0	737	1.5	18.1	73	13.1	0.4	333	26	0
89	2012-08-03	1600	216	0	589	1.5	17.4	75	12.9	0.4	335	26.2	0
89	2012-08-03	1700	216	0	413	1.5	16.6	77	12.6	0.4	331	26.4	0
89	2012-08-03	1800	216	0	143	1.4	14.9	84	12.2	2.5	334	26.6	0
89	2012-08-03	1900	216	0	17	1.4	14.1	89	12.3	0.4	320	26.9	0
89	2012-08-03	2000	216	0	0	1.4	13.9	91	12.4	0.4	318	27	0
89	2012-08-03	2100	216	0	0	1.4	13.6	92	12.4	0.4	322	27.1	0
89	2012-08-03	2200	216	0	0	1.5	13.7	93	12.5	0.4	319	27.2	0
89	2012-08-03	2300	216	0	0	1.5	13.5	94	12.5	0.4	319	27.2	0
89	2012-08-03	2400	216	0	0	1.4	13.2	95	12.4	0.4	315	27.1	0
89	2012-08-04	100	217	0	0	1.4	13.1	94	12.1	0.4	321	27.1	0
89	2012-08-04	200	217	0	0	1.4	12.9	94	12	0.4	338	27	0
89	2012-08-04	300	217	0	0	1.4	12.8	94	12	0.4	326	26.9	0
89	2012-08-04	400	217	0	0	1.4	12.9	95	12	0.4	265	26.8	0
89	2012-08-04	500	217	0	0	1.4	13	94	12	0.4	304	26.7	0
89	2012-08-04	600	217	0	7	1.4	13	94	12	0.4	299	26.5	0
89	2012-08-04	700	217	0	73	1.4	12.7	95	11.9	0.4	327	26.4	0
89	2012-08-04	800	217	0	277	1.4	13.3	93	12.2	0.4	332	26.3	0
89	2012-08-04	900	217	0	471	1.4	15.3	83	12.5	2.6	298	26.2	0
89	2012-08-04	1000	217	0	223	1.5	15.6	83	12.7	3.3	310	26.1	0
89	2012-08-04	1100	217	0	221	1.4	15.1	83	12.3	3.9	310	26	0
89	2012-08-04	1200	217	0	322	1.4	15.8	80	12.4	1.4	329	25.9	0
89	2012-08-04	1300	217	0	266	1.5	16.5	78	12.7	0.4	332	25.9	0
89	2012-08-04	1400	217	0	143	1.5	16.5	78	12.6	0.4	323	25.9	0
89	2012-08-04	1500	217	0	134	1.4	15.1	83	12.2	0.4	323	25.9	0
89	2012-08-04	1600	217	0	122	1.4	15.1	84	12.4	0.4	317	25.9	0
89	2012-08-04	1700	217	0	105	1.5	15	85	12.6	0.4	334	25.9	0
89	2012-08-04	1800	217	0	122	1.5	15.1	86	12.7	0.4	329	25.9	0
89	2012-08-04	1900	217	0	28	1.5	14.8	87	12.6	0.4	314	25.8	0
89	2012-08-04	2000	217	0	0	1.5	14.3	90	12.7	0.4	307	25.8	0
89	2012-08-04	2100	217	0	0	1.5	14.3	90	12.7	0.4	317	25.8	0
89	2012-08-04	2200	217	0	0	1.5	14.3	91	12.8	0.4	327	25.7	0
89	2012-08-04	2300	217	0	0	1.5	14.1	92	12.8	0.4	323	25.6	0
89	2012-08-04	2400	217	0	0	1.5	14.1	92	12.7	0.4	308	25.6	0
89	2012-08-05	100	218	0	0	1.5	14	93	12.9	0.4	317	25.5	0
89	2012-08-05	200	218	0	0	1.5	13.9	94	13	0.4	351	25.4	0
89	2012-08-05	300	218	0	0	1.5	13.9	95	13.1	0.4	320	25.3	0
89	2012-08-05	400	218	0	0	1.5	13.7	95	13	0.4	332	25.2	0
89	2012-08-05	500	218	0	0	1.5	13.6	96	13	0.4	329	25.1	0
89	2012-08-05	600	218	0	7	1.5	13.6	96	13	0.4	316	25	0
89	2012-08-05	700	218	0	39	1.5	13.7	95	13	0.4	334	24.9	0
89	2012-08-05	800	218	0	88	1.5	14.1	92	12.9	0.4	299	24.8	0
89	2012-08-05	900	218	0	150	1.5	14.7	90	13	0.4	327	24.7	0
89	2012-08-05	1000	218	0	322	1.5	15.6	86	13.2	0.4	326	24.6	0
89	2012-08-05	1100	218	0	622	1.6	16.9	81	13.6	0.4	331	24.6	0
89	2012-08-05	1200	218	0	875	1.6	18.8	74	14	0.4	326	24.5	0
89	2012-08-05	1300	218	0	884	1.6	19.5	71	14.1	0.4	313	24.5	0
89	2012-08-05	1400	218	0	834	1.6	20.2	68	14.2	4.1	317	24.5	0
89	2012-08-05	1500	218	0	733	1.6	20.3	68	14.1	6.1	321	24.6	0
89	2012-08-05	1600	218	0	591	1.6	19.8	69	14	6.4	326	24.8	0
89	2012-08-05	1700	218	0	417	1.5	18.6	72	13.5	6.5	325	25.1	0
89	2012-08-05	1800	218	0	233	1.5	17.6	73	12.8	5.9	322	25.3	0
89	2012-08-05	1900	218	0	65	1.4	16	77	12	5.4	326	25.6	0
89	2012-08-05	2000	218	0	1	1.4	14.6	83	11.6	4.4	320	25.8	0
89	2012-08-05	2100	218	0	0	1.4	13.8	88	11.7	2.1	325	25.9	0
89	2012-08-05	2200	218	0	0	1.4	13.2	91	11.7	0.4	337	26	0
89	2012-08-05	2300	218	0	0	1.4	12.8	92	11.6	0.4	345	26	0
89	2012-08-05	2400	218	0	0	1.4	12.6	93	11.6	0.4	325	26	0
89	2012-08-06	100	219	0	0	1.3	12.2	94	11.3	0.4	327	25.9	0
89	2012-08-06	200	219	0	0	1.3	11.6	95	10.8	0.4	354	25.9	0
89	2012-08-06	300	219	0	0	1.2	10.3	95	9.6	0.4	193	25.7	0
89	2012-08-06	400	219	0	0	1.2	10.8	96	10.2	0.4	135	25.6	0
89	2012-08-06	500	219	0	0	1.3	11.8	96	11.2	0.4	325	25.5	0
89	2012-08-06	600	219	0	9	1.3	11.7	97	11.2	0.4	350	25.3	0
89	2012-08-06	700	219	0	55	1.3	11.7	97	11.2	0.4	329	25.2	0

## Sheet: LeafWetnessByEvent
date	time	wet(%)	trial	event
2008-07-25	12:31:49	4.12	0	1
2008-07-25	12:46:49	4.12	0	1
2008-07-25	13:01:49	4.71	0	1
2008-07-25	13:16:49	4.71	0	1
2008-07-25	13:31:49	4.12	0	1
2008-07-25	13:46:49	4.71	0	1
2008-07-25	14:01:49	4.12	0	1
2008-07-25	14:16:49	4.12	0	1
2008-07-25	14:31:49	4.71	0	1
2008-07-25	14:46:49	4.71	0	1
2008-07-25	15:01:49	4.12	0	1
2008-07-25	15:16:49	4.12	0	1
2008-07-25	15:31:49	4.12	0	1
2008-07-25	15:46:49	4.12	0	1
2008-07-25	16:01:49	4.12	0	1
2008-07-25	16:16:49	3.53	0	1
2008-07-25	16:31:49	3.53	0	1
2008-07-25	16:46:49	4.12	0	1
2008-07-25	17:01:49	4.12	0	1
2008-07-25	17:16:49	4.12	0	1
2008-07-25	17:31:49	3.53	0	1
2008-07-25	17:46:49	3.53	0	1
2008-07-25	18:01:49	4.12	0	1
2008-07-25	18:16:49	3.53	0	1
2008-07-25	18:31:49	3.53	0	1
2008-07-25	18:46:49	4.12	0	1
2008-07-25	19:01:49	3.53	0	1
2008-07-25	19:16:49	3.53	0	1
2008-07-25	19:31:49	3.53	0	1
2008-07-25	19:46:49	3.53	0	1
2008-07-25	20:01:49	3.53	0	1
2008-07-25	20:16:49	3.53	0	1
2008-07-25	20:31:49	8.82	0	1
2008-07-25	20:46:49	24.71	0	1
2008-07-25	21:01:49	38.24	0	1
2008-07-25	21:16:49	40	0	1
2008-07-25	21:31:49	44.71	0	1
2008-07-25	21:46:49	52.35	0	1
2008-07-25	22:01:49	49.41	0	1
2008-07-25	22:16:49	62.94	0	1
2008-07-25	22:31:49	68.24	0	1
2008-07-25	22:46:49	58.24	0	1
2008-07-25	23:01:49	47.06	0	1
2008-07-25	23:16:49	37.06	0	1
2008-07-25	23:31:49	32.35	0	1
2008-07-25	23:46:49	30.59	0	1
2008-07-26	00:01:49	30	0	1
2008-07-26	00:16:49	30.59	0	1
2008-07-26	00:31:49	29.41	0	1
2008-07-26	00:46:49	28.24	0	1
2008-07-26	01:01:49	28.24	0	1
2008-07-26	01:16:49	28.24	0	1
2008-07-26	01:31:49	28.82	0	1
2008-07-26	01:46:49	29.41	0	1
2008-07-26	02:01:49	29.41	0	1
2008-07-26	02:16:49	28.82	0	1
2008-07-26	02:31:49	29.41	0	1
2008-07-26	02:46:49	31.18	0	1
2008-07-26	03:01:49	31.18	0	1
2008-07-26	03:16:49	31.76	0	1
2008-07-26	03:31:49	32.35	0	1
2008-07-26	03:46:49	32.94	0	1
2008-07-26	04:01:49	35.88	0	1
2008-07-26	04:16:49	34.12	0	1
2008-07-26	04:31:49	37.65	0	1
2008-07-26	04:46:49	35.88	0	1
2008-07-26	05:01:49	39.41	0	1
2008-07-26	05:16:49	41.18	0	1
2008-07-26	05:31:49	42.94	0	1
2008-07-26	05:46:49	42.94	0	1
2008-07-26	06:01:49	46.47	0	1
2008-07-26	06:16:49	46.47	0	1
2008-07-26	06:31:49	47.06	0	1
2008-07-26	06:46:49	48.82	0	1
2008-07-26	07:01:49	46.47	0	1
2008-07-26	07:16:49	44.71	0	1
2008-07-26	07:31:49	40.59	0	1
2008-07-26	07:46:49	37.06	0	1
2008-07-26	08:01:49	34.12	0	1
2008-07-26	08:16:49	27.65	0	1
2008-07-26	08:31:49	100	0	1
2008-07-26	08:46:49	100	0	1
2008-07-26	09:01:49	100	0	1
2008-07-26	09:16:49	100	0	1
2008-07-26	09:31:49	100	0	1
2008-07-26	09:46:49	100	0	1
2008-07-26	10:01:49	100	0	1
2008-07-26	10:16:49	100	0	1
2008-07-26	10:31:49	100	0	1
2008-07-26	10:46:49	100	0	1
2008-07-26	11:01:49	100	0	1
2008-07-26	11:16:49	100	0	1
2008-07-26	11:31:49	100	0	1
2008-07-26	11:46:49	100	0	1
2008-07-26	12:01:49	40	0	1
2008-07-26	12:16:49	10.59	0	1
2008-07-26	09:31:49	100	0	2
2008-07-26	09:46:49	100	0	2
2008-07-26	10:01:49	100	0	2
2008-07-26	10:16:49	100	0	2
2008-07-26	10:31:49	100	0	2
2008-07-26	10:46:49	100	0	2
2008-07-26	11:01:49	100	0	2
2008-07-26	11:16:49	100	0	2
2008-07-26	11:31:49	100	0	2
2008-07-26	11:46:49	100	0	2
2008-07-26	12:01:49	40	0	2
2008-07-26	12:16:49	10.59	0	2
2008-07-26	12:31:49	7.06	0	2
2008-07-26	12:46:49	5.88	0	2
2008-07-26	13:01:49	5.29	0	2
2008-07-26	13:16:49	5.29	0	2
2008-07-26	13:31:49	5.29	0	2
2008-07-26	13:46:49	4.71	0	2
2008-07-26	14:01:49	4.71	0	2
2008-07-26	14:16:49	4.71	0	2
2008-07-26	14:31:49	5.29	0	2
2008-07-26	14:46:49	4.71	0	2
2008-07-26	15:01:49	4.71	0	2
2008-07-26	15:16:49	4.71	0	2
2008-07-26	15:31:49	4.71	0	2
2008-07-26	15:46:49	4.71	0	2
2008-07-26	16:01:49	4.12	0	2
2008-07-26	16:16:49	4.71	0	2
2008-07-26	16:31:49	4.71	0	2
2008-07-26	16:46:49	4.12	0	2
2008-07-26	17:01:49	4.71	0	2
2008-07-26	17:16:49	4.71	0	2
2008-07-26	17:31:49	4.12	0	2
2008-07-26	17:46:49	4.12	0	2
2008-07-26	18:01:49	4.71	0	2
2008-07-26	18:16:49	4.12	0	2
2008-07-26	18:31:49	4.12	0	2
2008-07-26	18:46:49	4.12	0	2
2008-07-26	19:01:49	4.12	0	2
2008-07-26	19:16:49	4.71	0	2
2008-07-26	19:31:49	4.71	0	2
2008-07-26	19:46:49	7.06	0	2
2008-07-26	20:01:49	7.65	0	2
2008-07-26	20:16:49	8.82	0	2
2008-07-26	20:31:49	8.82	0	2
2008-07-26	20:46:49	9.41	0	2
2008-07-26	21:01:49	10.59	0	2
2008-07-26	21:16:49	12.35	0	2
2008-07-26	21:31:49	18.82	0	2
2008-07-26	21:46:49	27.06	0	2
2008-07-26	22:01:49	27.06	0	2
2008-07-26	22:16:49	38.24	0	2
2008-07-26	22:31:49	62.94	0	2
2008-07-26	22:46:49	67.06	0	2
2008-07-26	23:01:49	70.59	0	2
2008-07-26	23:16:49	84.12	0	2
2008-07-26	23:31:49	90	0	2
2008-07-26	23:46:49	81.76	0	2
2008-07-27	00:01:49	84.12	0	2
2008-07-27	00:16:49	88.82	0	2
2008-07-27	00:31:49	83.53	0	2
2008-07-27	00:46:49	85.88	0	2
2008-07-27	01:01:49	85.29	0	2
2008-07-27	01:16:49	84.12	0	2
2008-07-27	01:31:49	84.71	0	2
2008-07-27	01:46:49	98.24	0	2
2008-07-27	02:01:49	88.24	0	2
2008-07-27	02:16:49	95.29	0	2
2008-07-27	02:31:49	100	0	2
2008-07-27	02:46:49	100	0	2
2008-07-27	03:01:49	92.94	0	2
2008-07-27	03:16:49	88.82	0	2
2008-07-27	03:31:49	87.65	0	2
2008-07-27	03:46:49	91.18	0	2
2008-07-27	04:01:49	82.94	0	2
2008-07-27	04:16:49	82.35	0	2
2008-07-27	04:31:49	88.24	0	2
2008-07-27	04:46:49	93.53	0	2
2008-07-27	05:01:49	98.82	0	2
2008-07-27	05:16:49	89.41	0	2
2008-07-27	05:31:49	84.12	0	2
2008-07-27	05:46:49	88.82	0	2
2008-07-27	06:01:49	88.24	0	2
2008-07-27	06:16:49	87.65	0	2
2008-07-27	06:31:49	84.71	0	2
2008-07-27	06:46:49	79.41	0	2
2008-07-27	07:01:49	78.82	0	2
2008-07-27	07:16:49	73.53	0	2
2008-07-27	07:31:49	71.18	0	2
2008-07-27	07:46:49	54.12	0	2
2008-07-27	08:01:49	35.29	0	2
2008-07-27	08:16:49	30	0	2
2008-07-27	08:31:49	20	0	2
2008-07-27	08:46:49	12.94	0	2
2008-07-27	09:01:49	11.18	0	2
2008-07-27	09:16:49	10	0	2
2008-07-27	09:16:49	10	0	3
2008-07-27	09:31:49	8.24	0	3
2008-07-27	09:46:49	6.47	0	3
2008-07-27	10:01:49	6.47	0	3
2008-07-27	10:16:49	5.88	0	3
2008-07-27	10:31:49	5.29	0	3
2008-07-27	10:46:49	4.71	0	3
2008-07-27	11:01:49	5.29	0	3
2008-07-27	11:16:49	4.71	0	3
2008-07-27	11:31:49	4.71	0	3
2008-07-27	11:46:49	5.29	0	3
2008-07-27	12:01:49	4.71	0	3
2008-07-27	12:16:49	4.71	0	3
2008-07-27	12:31:49	4.71	0	3
2008-07-27	12:46:49	4.71	0	3
2008-07-27	13:01:49	4.71	0	3
2008-07-27	13:16:49	4.71	0	3
2008-07-27	13:31:49	5.29	0	3
2008-07-27	13:46:49	4.71	0	3
2008-07-27	14:01:49	4.71	0	3
2008-07-27	14:16:49	4.71	0	3
2008-07-27	14:31:49	4.12	0	3
2008-07-27	14:46:49	4.71	0	3
2008-07-27	15:01:49	4.71	0	3
2008-07-27	15:16:49	4.71	0	3
2008-07-27	15:31:49	4.71	0	3
2008-07-27	15:46:49	4.71	0	3
2008-07-27	16:01:49	4.71	0	3
2008-07-27	16:16:49	4.12	0	3
2008-07-27	16:31:49	4.12	0	3
2008-07-27	16:46:49	4.12	0	3
2008-07-27	17:01:49	4.12	0	3
2008-07-27	17:16:49	4.12	0	3
2008-07-27	17:31:49	4.12	0	3
2008-07-27	17:46:49	4.71	0	3
2008-07-27	18:01:49	4.12	0	3
2008-07-27	18:16:49	4.12	0	3
2008-07-27	18:31:49	4.12	0	3
2008-07-27	18:46:49	4.71	0	3
2008-07-27	19:01:49	4.71	0	3
2008-07-27	19:16:49	4.12	0	3
2008-07-27	19:31:49	4.71	0	3
2008-07-27	19:46:49	8.24	0	3
2008-07-27	20:01:49	10	0	3
2008-07-27	20:16:49	13.53	0	3
2008-07-27	20:31:49	15.88	0	3
2008-07-27	20:46:49	18.82	0	3
2008-07-27	21:01:49	21.18	0	3
2008-07-27	21:16:49	23.53	0	3
2008-07-27	21:31:49	25.88	0	3
2008-07-27	21:46:49	25.88	0	3
2008-07-27	22:01:49	28.24	0	3
2008-07-27	22:16:49	30.59	0	3
2008-07-27	22:31:49	32.35	0	3
2008-07-27	22:46:49	35.88	0	3
2008-07-27	23:01:49	41.18	0	3
2008-07-27	23:16:49	42.35	0	3
2008-07-27	23:31:49	43.53	0	3
2008-07-27	23:46:49	46.47	0	3
2008-07-28	00:01:49	50	0	3
2008-07-28	00:16:49	54.71	0	3
2008-07-28	00:31:49	54.71	0	3
2008-07-28	00:46:49	53.53	0	3
2008-07-28	01:01:49	54.12	0	3
2008-07-28	01:16:49	55.29	0	3
2008-07-28	01:31:49	55.88	0	3
2008-07-28	01:46:49	56.47	0	3
2008-07-28	02:01:49	58.24	0	3
2008-07-28	02:16:49	67.65	0	3
2008-07-28	02:31:49	73.53	0	3
2008-07-28	02:46:49	79.41	0	3
2008-07-28	03:01:49	82.35	0	3
2008-07-28	03:16:49	91.18	0	3
2008-07-28	03:31:49	92.94	0	3
2008-07-28	03:46:49	84.12	0	3
2008-07-28	04:01:49	80	0	3
2008-07-28	04:16:49	92.94	0	3
2008-07-28	04:31:49	90	0	3
2008-07-28	04:46:49	100	0	3
2008-07-28	05:01:49	96.47	0	3
2008-07-28	05:16:49	91.76	0	3
2008-07-28	05:31:49	85.88	0	3
2008-07-28	05:46:49	87.06	0	3
2008-07-28	06:01:49	80	0	3
2008-07-28	06:16:49	80	0	3
2008-07-28	06:31:49	91.76	0	3
2008-07-28	06:46:49	88.82	0	3
2008-07-28	07:01:49	96.47	0	3
2008-07-28	07:16:49	100	0	3
2008-07-28	07:31:49	100	0	3
2008-07-28	07:46:49	100	0	3
2008-07-28	08:01:49	100	0	3
2008-07-28	08:16:49	79.41	0	3
2008-07-28	08:31:49	75.29	0	3
2008-07-28	08:46:49	62.94	0	3
2008-07-28	09:01:49	38.82	0	3
2008-07-28	09:46:49	15.29	0	4
2008-07-28	10:01:49	12.94	0	4
2008-07-28	10:16:49	11.76	0	4
2008-07-28	10:31:49	9.41	0	4
2008-07-28	10:46:49	7.65	0	4
2008-07-28	11:01:49	6.47	0	4
2008-07-28	11:16:49	5.88	0	4
2008-07-28	11:31:49	5.29	0	4
2008-07-28	11:46:49	5.29	0	4
2008-07-28	12:01:49	4.71	0	4
2008-07-28	12:16:49	5.29	0	4
2008-07-28	12:31:49	4.71	0	4
2008-07-28	12:46:49	5.29	0	4
2008-07-28	13:01:49	5.29	0	4
2008-07-28	13:16:49	4.71	0	4
2008-07-28	13:31:49	4.71	0	4
2008-07-28	13:46:49	4.71	0	4
2008-07-28	14:01:49	5.29	0	4
2008-07-28	14:16:49	4.71	0	4
2008-07-28	14:31:49	5.29	0	4
2008-07-28	14:46:49	4.71	0	4
2008-07-28	15:01:49	4.71	0	4
2008-07-28	15:16:49	4.71	0	4
2008-07-28	15:31:49	5.29	0	4
2008-07-28	15:46:49	4.71	0	4
2008-07-28	16:01:49	4.71	0	4
2008-07-28	16:16:49	4.71	0	4
2008-07-28	16:31:49	4.71	0	4
2008-07-28	16:46:49	4.12	0	4
2008-07-28	17:01:49	4.71	0	4
2008-07-28	17:16:49	4.71	0	4
2008-07-28	17:31:49	4.71	0	4
2008-07-28	17:46:49	4.71	0	4
2008-07-28	18:01:49	4.71	0	4
2008-07-28	18:16:49	4.71	0	4
2008-07-28	18:31:49	4.71	0	4
2008-07-28	18:46:49	6.47	0	4
2008-07-28	19:01:49	8.82	0	4
2008-07-28	19:16:49	10	0	4
2008-07-28	19:31:49	13.53	0	4
2008-07-28	19:46:49	15.29	0	4
2008-07-28	20:01:49	21.18	0	4
2008-07-28	20:16:49	27.65	0	4
2008-07-28	20:31:49	34.71	0	4
2008-07-28	20:46:49	54.71	0	4
2008-07-28	21:01:49	69.41	0	4
2008-07-28	21:16:49	87.65	0	4
2008-07-28	21:31:49	87.65	0	4
2008-07-28	21:46:49	87.06	0	4
2008-07-28	22:01:49	88.24	0	4
2008-07-28	22:16:49	88.82	0	4
2008-07-28	22:31:49	92.35	0	4
2008-07-28	22:46:49	89.41	0	4
2008-07-28	23:01:49	89.41	0	4
2008-07-28	23:16:49	90.59	0	4
2008-07-28	23:31:49	92.35	0	4
2008-07-28	23:46:49	91.76	0	4
2008-07-29	00:01:49	92.35	0	4
2008-07-29	00:16:49	91.18	0	4
2008-07-29	00:31:49	91.18	0	4
2008-07-29	00:46:49	92.35	0	4
2008-07-29	01:01:49	94.12	0	4
2008-07-29	01:16:49	94.71	0	4
2008-07-29	01:31:49	94.71	0	4
2008-07-29	01:46:49	96.47	0	4
2008-07-29	02:01:49	95.88	0	4
2008-07-29	02:16:49	96.47	0	4
2008-07-29	02:31:49	99.41	0	4
2008-07-29	02:46:49	96.47	0	4
2008-07-29	03:01:49	96.47	0	4
2008-07-29	03:16:49	96.47	0	4
2008-07-29	03:31:49	98.24	0	4
2008-07-29	03:46:49	100	0	4
2008-07-29	04:01:49	100	0	4
2008-07-29	04:16:49	100	0	4
2008-07-29	04:31:49	100	0	4
2008-07-29	04:46:49	100	0	4
2008-07-29	05:01:49	100	0	4
2008-07-29	05:16:49	100	0	4
2008-07-29	05:31:49	100	0	4
2008-07-29	05:46:49	100	0	4
2008-07-29	06:01:49	100	0	4
2008-07-29	06:16:49	100	0	4
2008-07-29	06:31:49	100	0	4
2008-07-29	06:46:49	100	0	4
2008-07-29	07:01:49	100	0	4
2008-07-29	07:16:49	100	0	4
2008-07-29	07:31:49	100	0	4
2008-07-29	07:46:49	100	0	4
2008-07-29	08:01:49	98.82	0	4
2008-07-29	08:16:49	92.35	0	4
2008-07-29	08:31:49	88.82	0	4
2008-07-29	08:46:49	56.47	0	4
2008-07-29	09:01:49	40	0	4
2008-07-29	09:16:49	22.94	0	4
2008-07-29	09:31:49	9.41	0	4
2008-07-29	09:31:49	9.41	0	5
2008-07-29	09:46:49	5.88	0	5
2008-07-29	10:01:49	5.29	0	5
2008-07-29	10:16:49	5.29	0	5
2008-07-29	10:31:49	5.88	0	5
2008-07-29	10:46:49	5.29	0	5
2008-07-29	11:01:49	5.88	0	5
2008-07-29	11:16:49	5.29	0	5
2008-07-29	11:31:49	5.29	0	5
2008-07-29	11:46:49	5.29	0	5
2008-07-29	12:01:49	5.29	0	5
2008-07-29	12:16:49	5.29	0	5
2008-07-29	12:31:49	5.29	0	5
2008-07-29	12:46:49	5.29	0	5
2008-07-29	13:01:49	5.29	0	5
2008-07-29	13:16:49	5.29	0	5
2008-07-29	13:31:49	5.29	0	5
2008-07-29	13:46:49	5.29	0	5
2008-07-29	14:01:49	5.29	0	5
2008-07-29	14:16:49	4.71	0	5
2008-07-29	14:31:49	4.71	0	5
2008-07-29	14:46:49	4.71	0	5
2008-07-29	15:01:49	4.71	0	5
2008-07-29	15:16:49	4.71	0	5
2008-07-29	15:31:49	4.71	0	5
2008-07-29	15:46:49	4.71	0	5
2008-07-29	16:01:49	4.71	0	5
2008-07-29	16:16:49	4.71	0	5
2008-07-29	16:31:49	4.12	0	5
2008-07-29	16:46:49	4.12	0	5
2008-07-29	17:01:49	4.12	0	5
2008-07-29	17:16:49	4.12	0	5
2008-07-29	17:31:49	4.71	0	5
2008-07-29	17:46:49	4.71	0	5
2008-07-29	18:01:49	4.12	0	5
2008-07-29	18:16:49	3.53	0	5
2008-07-29	18:31:49	4.12	0	5
2008-07-29	18:46:49	4.12	0	5
2008-07-29	19:01:49	4.12	0	5
2008-07-29	19:16:49	3.53	0	5
2008-07-29	19:31:49	3.53	0	5
2008-07-29	19:46:49	4.12	0	5
2008-07-29	20:01:49	4.12	0	5
2008-07-29	20:16:49	4.71	0	5
2008-07-29	20:31:49	10	0	5
2008-07-29	20:46:49	29.41	0	5
2008-07-29	21:01:49	68.82	0	5
2008-07-29	21:16:49	80	0	5
2008-07-29	21:31:49	85.29	0	5
2008-07-29	21:46:49	91.76	0	5
2008-07-29	22:01:49	96.47	0	5
2008-07-29	22:16:49	100	0	5
2008-07-29	22:31:49	100	0	5
2008-07-29	22:46:49	100	0	5
2008-07-29	23:01:49	100	0	5
2008-07-29	23:16:49	100	0	5
2008-07-29	23:31:49	100	0	5
2008-07-29	23:46:49	100	0	5
2008-07-30	00:01:49	100	0	5
2008-07-30	00:16:49	100	0	5
2008-07-30	00:31:49	100	0	5
2008-07-30	00:46:49	100	0	5
2008-07-30	01:01:49	100	0	5
2008-07-30	01:16:49	100	0	5
2008-07-30	01:31:49	100	0	5
2008-07-30	01:46:49	100	0	5
2008-07-30	02:01:49	100	0	5
2008-07-30	02:16:49	100	0	5
2008-07-30	02:31:49	100	0	5
2008-07-30	02:46:49	100	0	5
2008-07-30	03:01:49	100	0	5
2008-07-30	03:16:49	100	0	5
2008-07-30	03:31:49	100	0	5
2008-07-30	03:46:49	100	0	5
2008-07-30	04:01:49	100	0	5
2008-07-30	04:16:49	100	0	5
2008-07-30	04:31:49	100	0	5
2008-07-30	04:46:49	100	0	5
2008-07-30	05:01:49	100	0	5
2008-07-30	05:16:49	100	0	5
2008-07-30	05:31:49	100	0	5
2008-07-30	05:46:49	100	0	5
2008-07-30	06:01:49	100	0	5
2008-07-30	06:16:49	100	0	5
2008-07-30	06:31:49	100	0	5
2008-07-30	06:46:49	100	0	5
2008-07-30	07:01:49	100	0	5
2008-07-30	07:16:49	100	0	5
2008-07-30	07:31:49	98.82	0	5
2008-07-30	07:46:49	90.59	0	5
2008-07-30	08:01:49	82.94	0	5
2008-07-30	08:16:49	69.41	0	5
2008-07-30	08:31:49	51.18	0	5
2008-07-30	08:46:49	31.18	0	5
2008-07-30	09:01:49	18.82	0	5
2008-07-30	09:16:49	11.76	0	5
2008-07-30	08:16:49	69.41	0	6
2008-07-30	08:31:49	51.18	0	6
2008-07-30	08:46:49	31.18	0	6
2008-07-30	09:01:49	18.82	0	6
2008-07-30	09:16:49	11.76	0	6
2008-07-30	09:31:49	9.41	0	6
2008-07-30	09:46:49	7.06	0	6
2008-07-30	10:01:49	5.88	0	6
2008-07-30	10:16:49	5.29	0	6
2008-07-30	10:31:49	5.29	0	6
2008-07-30	10:46:49	5.29	0	6
2008-07-30	11:01:49	4.71	0	6
2008-07-30	11:16:49	5.29	0	6
2008-07-30	11:31:49	5.29	0	6
2008-07-30	11:46:49	4.71	0	6
2008-07-30	12:01:49	4.71	0	6
2008-07-30	12:16:49	5.29	0	6
2008-07-30	12:31:49	5.88	0	6
2008-07-30	12:46:49	5.29	0	6
2008-07-30	13:01:49	4.71	0	6
2008-07-30	13:16:49	4.71	0	6
2008-07-30	13:31:49	4.71	0	6
2008-07-30	13:46:49	5.29	0	6
2008-07-30	14:01:49	4.71	0	6
2008-07-30	14:16:49	4.71	0	6
2008-07-30	14:31:49	4.71	0	6
2008-07-30	14:46:49	4.71	0	6
2008-07-30	15:01:49	4.71	0	6
2008-07-30	15:16:49	4.71	0	6
2008-07-30	15:31:49	4.71	0	6
2008-07-30	15:46:49	5.29	0	6
2008-07-30	16:01:49	4.71	0	6
2008-07-30	16:16:49	4.12	0	6
2008-07-30	16:31:49	4.71	0	6
2008-07-30	16:46:49	4.12	0	6
2008-07-30	17:01:49	4.12	0	6
2008-07-30	17:16:49	4.12	0	6
2008-07-30	17:31:49	4.12	0	6
2008-07-30	17:46:49	4.12	0	6
2008-07-30	18:01:49	4.12	0	6
2008-07-30	18:16:49	4.12	0	6
2008-07-30	18:31:49	4.12	0	6
2008-07-30	18:46:49	4.12	0	6
2008-07-30	19:01:49	4.12	0	6
2008-07-30	19:16:49	4.12	0	6
2008-07-30	19:31:49	4.12	0	6
2008-07-30	19:46:49	4.71	0	6
2008-07-30	20:01:49	7.65	0	6
2008-07-30	20:16:49	18.24	0	6
2008-07-30	20:31:49	64.71	0	6
2008-07-30	20:46:49	63.53	0	6
2008-07-30	21:01:49	65.88	0	6
2008-07-30	21:16:49	58.24	0	6
2008-07-30	21:31:49	62.35	0	6
2008-07-30	21:46:49	71.18	0	6
2008-07-30	22:01:49	71.76	0	6
2008-07-30	22:16:49	76.47	0	6
2008-07-30	22:31:49	92.35	0	6
2008-07-30	22:46:49	91.76	0	6
2008-07-30	23:01:49	82.35	0	6
2008-07-30	23:16:49	82.35	0	6
2008-07-30	23:31:49	81.76	0	6
2008-07-30	23:46:49	81.18	0	6
2008-07-31	00:01:49	80.59	0	6
2008-07-31	00:16:49	80.59	0	6
2008-07-31	00:31:49	78.24	0	6
2008-07-31	00:46:49	80	0	6
2008-07-31	01:01:49	82.35	0	6
2008-07-31	01:16:49	78.82	0	6
2008-07-31	01:31:49	81.18	0	6
2008-07-31	01:46:49	77.06	0	6
2008-07-31	02:01:49	82.35	0	6
2008-07-31	02:16:49	77.65	0	6
2008-07-31	02:31:49	74.12	0	6
2008-07-31	02:46:49	82.35	0	6
2008-07-31	03:01:49	91.76	0	6
2008-07-31	03:16:49	84.71	0	6
2008-07-31	03:31:49	82.35	0	6
2008-07-31	03:46:49	90.59	0	6
2008-07-31	04:01:49	85.29	0	6
2008-07-31	04:16:49	88.82	0	6
2008-07-31	04:31:49	88.24	0	6
2008-07-31	04:46:49	88.82	0	6
2008-07-31	05:01:49	87.65	0	6
2008-07-31	05:16:49	84.71	0	6
2008-07-31	05:31:49	87.65	0	6
2008-07-31	05:46:49	85.88	0	6
2008-07-31	06:01:49	88.82	0	6
2008-07-31	06:16:49	88.24	0	6
2008-07-31	06:31:49	88.82	0	6
2008-07-31	06:46:49	87.65	0	6
2008-07-31	07:01:49	85.88	0	6
2008-07-31	07:16:49	83.53	0	6
2008-07-31	07:31:49	81.18	0	6
2008-07-31	07:46:49	73.53	0	6
2008-07-31	08:01:49	64.71	0	6
2008-07-31	08:31:49	42.94	0	7
2008-07-31	08:46:49	37.65	0	7
2008-07-31	09:01:49	100	0	7
2008-07-31	09:16:49	100	0	7
2008-07-31	09:31:49	100	0	7
2008-07-31	09:46:49	54.71	0	7
2008-07-31	10:01:49	24.12	0	7
2008-07-31	10:16:49	14.71	0	7
2008-07-31	10:31:49	81.76	0	7
2008-07-31	10:46:49	11.76	0	7
2008-07-31	11:01:49	7.65	0	7
2008-07-31	11:16:49	7.65	0	7
2008-07-31	11:31:49	6.47	0	7
2008-07-31	11:46:49	5.88	0	7
2008-07-31	12:01:49	5.29	0	7
2008-07-31	12:16:49	5.29	0	7
2008-07-31	12:31:49	5.88	0	7
2008-07-31	12:46:49	5.29	0	7
2008-07-31	13:01:49	5.29	0	7
2008-07-31	13:16:49	5.29	0	7
2008-07-31	13:31:49	5.88	0	7
2008-07-31	13:46:49	5.88	0	7
2008-07-31	14:01:49	5.29	0	7
2008-07-31	14:16:49	5.29	0	7
2008-07-31	14:31:49	5.29	0	7
2008-07-31	14:46:49	5.29	0	7
2008-07-31	15:01:49	5.29	0	7
2008-07-31	15:16:49	4.71	0	7
2008-07-31	15:31:49	4.71	0	7
2008-07-31	09:46:49	54.71	0	8
2008-07-31	10:01:49	24.12	0	8
2008-07-31	10:16:49	14.71	0	8
2008-07-31	10:31:49	81.76	0	8
2008-07-31	10:46:49	11.76	0	8
2008-07-31	11:01:49	7.65	0	8
2008-07-31	11:16:49	7.65	0	8
2008-07-31	11:31:49	6.47	0	8
2008-07-31	11:46:49	5.88	0	8
2008-07-31	12:01:49	5.29	0	8
2008-07-31	12:16:49	5.29	0	8
2008-07-31	12:31:49	5.88	0	8
2008-07-31	12:46:49	5.29	0	8
2008-07-31	13:01:49	5.29	0	8
2008-07-31	13:16:49	5.29	0	8
2008-07-31	13:31:49	5.88	0	8
2008-07-31	13:46:49	5.88	0	8
2008-07-31	14:01:49	5.29	0	8
2008-07-31	14:16:49	5.29	0	8
2008-07-31	14:31:49	5.29	0	8
2008-07-31	14:46:49	5.29	0	8
2008-07-31	15:01:49	5.29	0	8
2008-07-31	15:16:49	4.71	0	8
2008-07-31	15:31:49	4.71	0	8
2008-07-31	15:46:49	4.71	0	8
2008-07-31	16:01:49	4.71	0	8
2008-07-31	16:16:49	4.71	0	8
2008-07-31	16:31:49	5.29	0	8
2008-07-31	16:46:49	4.71	0	8
2008-07-31	17:01:49	4.12	0	8
2008-07-31	17:16:49	4.71	0	8
2008-07-31	17:31:49	5.29	0	8
2008-07-31	17:46:49	4.71	0	8
2008-07-31	18:01:49	5.29	0	8
2008-07-31	18:16:49	4.71	0	8
2008-07-31	18:31:49	4.71	0	8
2008-07-31	18:46:49	6.47	0	8
2008-07-31	19:01:49	7.06	0	8
2008-07-31	19:16:49	9.41	0	8
2008-07-31	19:31:49	11.76	0	8
2008-07-31	19:46:49	18.24	0	8
2008-07-31	20:01:49	30.59	0	8
2008-07-31	20:16:49	41.18	0	8
2008-07-31	20:31:49	48.82	0	8
2008-07-31	20:46:49	62.94	0	8
2008-07-31	21:01:49	68.82	0	8
2008-07-31	21:16:49	69.41	0	8
2008-07-31	21:31:49	77.65	0	8
2008-07-31	21:46:49	81.18	0	8
2008-07-31	22:01:49	88.24	0	8
2008-07-31	22:16:49	87.65	0	8
2008-07-31	22:31:49	87.06	0	8
2008-07-31	22:46:49	87.06	0	8
2008-07-31	23:01:49	91.76	0	8
2008-07-31	23:16:49	90.59	0	8
2008-07-31	23:31:49	92.35	0	8
2008-07-31	23:46:49	92.35	0	8
2008-08-01	00:01:49	94.12	0	8
2008-08-01	00:16:49	93.53	0	8
2008-08-01	00:31:49	93.53	0	8
2008-08-01	00:46:49	92.94	0	8
2008-08-01	01:01:49	93.53	0	8
2008-08-01	01:16:49	94.71	0	8
2008-08-01	01:31:49	95.88	0	8
2008-08-01	01:46:49	95.88	0	8
2008-08-01	02:01:49	95.88	0	8
2008-08-01	02:16:49	100	0	8
2008-08-01	02:31:49	99.41	0	8
2008-08-01	02:46:49	100	0	8
2008-08-01	03:01:49	100	0	8
2008-08-01	03:16:49	100	0	8
2008-08-01	03:31:49	100	0	8
2008-08-01	03:46:49	100	0	8
2008-08-01	04:01:49	100	0	8
2008-08-01	04:16:49	100	0	8
2008-08-01	04:31:49	100	0	8
2008-08-01	04:46:49	100	0	8
2008-08-01	05:01:49	100	0	8
2008-08-01	05:16:49	100	0	8
2008-08-01	05:31:49	100	0	8
2008-08-01	05:46:49	100	0	8
2008-08-01	06:01:49	100	0	8
2008-08-01	06:16:49	100	0	8
2008-08-01	06:31:49	100	0	8
2008-08-01	06:46:49	100	0	8
2008-08-01	07:01:49	100	0	8
2008-08-01	07:16:49	100	0	8
2008-08-01	07:31:49	100	0	8
2008-08-01	07:46:49	100	0	8
2008-08-01	08:01:49	93.53	0	8
2008-08-01	08:16:49	87.06	0	8
2008-08-01	08:31:49	80	0	8
2008-08-01	08:46:49	65.29	0	8
2008-08-01	09:01:49	52.94	0	8
2008-08-01	09:16:49	32.35	0	8
2008-08-01	09:31:49	11.76	0	8
2008-08-01	09:46:49	5.88	0	9
2008-08-01	10:01:49	5.29	0	9
2008-08-01	10:16:49	5.29	0	9
2008-08-01	10:31:49	4.71	0	9
2008-08-01	10:46:49	5.29	0	9
2008-08-01	11:01:49	4.71	0	9
2008-08-01	11:16:49	4.71	0	9
2008-08-01	11:31:49	5.88	0	9
2008-08-01	11:46:49	5.29	0	9
2008-08-01	12:01:49	5.29	0	9
2008-08-01	12:16:49	5.29	0	9
2008-08-01	12:31:49	5.29	0	9
2008-08-01	12:46:49	5.29	0	9
2008-08-01	13:01:49	5.29	0	9
2008-08-01	13:16:49	4.71	0	9
2008-08-01	13:31:49	5.29	0	9
2008-08-01	13:46:49	4.71	0	9
2008-08-01	14:01:49	5.29	0	9
2008-08-01	14:16:49	4.71	0	9
2008-08-01	14:31:49	5.29	0	9
2008-08-01	14:46:49	4.71	0	9
2008-08-01	15:01:49	4.71	0	9
2008-08-01	15:16:49	4.71	0	9
2008-08-01	15:31:49	4.71	0	9
2008-08-01	15:46:49	4.12	0	9
2008-08-01	16:01:49	4.71	0	9
2008-08-01	16:16:49	4.71	0	9
2008-08-01	16:31:49	4.12	0	9
2008-08-01	16:46:49	4.12	0	9
2008-08-01	17:01:49	4.12	0	9
2008-08-01	17:16:49	4.12	0	9
2008-08-01	17:31:49	4.12	0	9
2008-08-01	17:46:49	3.53	0	9
2008-08-01	18:01:49	4.12	0	9
2008-08-01	18:16:49	4.12	0	9
2008-08-01	18:31:49	4.12	0	9
2008-08-01	18:46:49	3.53	0	9
2008-08-01	19:01:49	4.12	0	9
2008-08-01	19:16:49	5.29	0	9
2008-08-01	19:31:49	18.24	0	9
2008-08-01	19:46:49	40.59	0	9
2008-08-01	20:01:49	49.41	0	9
2008-08-01	20:16:49	57.06	0	9
2008-08-01	20:31:49	60	0	9
2008-08-01	20:46:49	67.65	0	9
2008-08-01	21:01:49	73.53	0	9
2008-08-01	21:16:49	77.65	0	9
2008-08-01	21:31:49	79.41	0	9
2008-08-01	21:46:49	87.65	0	9
2008-08-01	22:01:49	89.41	0	9
2008-08-01	22:16:49	88.24	0	9
2008-08-01	22:31:49	88.82	0	9
2008-08-01	22:46:49	92.35	0	9
2008-08-01	23:01:49	90	0	9
2008-08-01	23:16:49	90.59	0	9
2008-08-01	23:31:49	90.59	0	9
2008-08-01	23:46:49	92.35	0	9
2008-08-02	00:01:49	97.65	0	9
2008-08-02	00:16:49	92.35	0	9
2008-08-02	00:31:49	94.12	0	9
2008-08-02	00:46:49	94.71	0	9
2008-08-02	01:01:49	94.71	0	9
2008-08-02	01:16:49	92.94	0	9
2008-08-02	01:31:49	93.53	0	9
2008-08-02	01:46:49	100	0	9
2008-08-02	02:01:49	100	0	9
2008-08-02	02:16:49	100	0	9
2008-08-02	02:31:49	100	0	9
2008-08-02	02:46:49	100	0	9
2008-08-02	03:01:49	100	0	9
2008-08-02	03:16:49	100	0	9
2008-08-02	03:31:49	100	0	9
2008-08-02	03:46:49	100	0	9
2008-08-02	04:01:49	100	0	9
2008-08-02	04:16:49	100	0	9
2008-08-02	04:31:49	100	0	9
2008-08-02	04:46:49	98.24	0	9
2008-08-02	05:01:49	97.65	0	9
2008-08-02	05:16:49	96.47	0	9
2008-08-02	05:31:49	95.29	0	9
2008-08-02	05:46:49	96.47	0	9
2008-08-02	06:01:49	100	0	9
2008-08-02	06:16:49	100	0	9
2008-08-02	06:31:49	100	0	9
2008-08-02	06:46:49	100	0	9
2008-08-02	07:01:49	100	0	9
2008-08-02	07:16:49	94.12	0	9
2008-08-02	07:31:49	92.94	0	9
2008-08-02	07:46:49	88.24	0	9
2008-08-02	08:01:49	82.35	0	9
2008-08-02	08:16:49	65.29	0	9
2008-08-02	08:31:49	52.94	0	9
2008-08-02	08:46:49	65.88	0	9
2008-08-02	09:01:49	41.76	0	9
2008-08-02	09:16:49	21.18	0	9
2008-08-02	09:31:49	15.29	0	9
2008-08-02	09:31:49	15.29	0	10
2008-08-02	09:46:49	12.94	0	10
2008-08-02	10:01:49	9.41	0	10
2008-08-02	10:16:49	8.82	0	10
2008-08-02	10:31:49	7.65	0	10
2008-08-02	10:46:49	5.29	0	10
2008-08-02	11:01:49	4.71	0	10
2008-08-02	11:16:49	5.29	0	10
2008-08-02	11:31:49	5.29	0	10
2008-08-02	11:46:49	5.29	0	10
2008-08-02	12:01:49	4.71	0	10
2008-08-02	12:16:49	5.29	0	10
2008-08-02	12:31:49	4.71	0	10
2008-08-02	12:46:49	5.29	0	10
2008-08-02	13:01:49	4.71	0	10
2008-08-02	13:16:49	4.71	0	10
2008-08-02	13:31:49	4.71	0	10
2008-08-02	13:46:49	4.71	0	10
2008-08-02	14:01:49	4.71	0	10
2008-08-02	14:16:49	4.71	0	10
2008-08-02	14:31:49	5.29	0	10
2008-08-02	14:46:49	4.71	0	10
2008-08-02	15:01:49	4.71	0	10
2008-08-02	15:16:49	4.71	0	10
2008-08-02	15:31:49	4.71	0	10
2008-08-02	15:46:49	4.71	0	10
2008-08-02	16:01:49	4.12	0	10
2008-08-02	16:16:49	4.12	0	10
2008-08-02	16:31:49	4.71	0	10
2008-08-02	16:46:49	4.12	0	10
2008-08-02	17:01:49	4.71	0	10
2008-08-02	17:16:49	4.12	0	10
2008-08-02	17:31:49	4.12	0	10
2008-08-02	17:46:49	4.71	0	10
2008-08-02	18:01:49	4.12	0	10
2008-08-02	18:16:49	4.12	0	10
2008-08-02	18:31:49	4.12	0	10
2008-08-02	18:46:49	4.12	0	10
2008-08-02	19:01:49	4.71	0	10
2008-08-02	19:16:49	6.47	0	10
2008-08-02	19:31:49	9.41	0	10
2008-08-02	19:46:49	11.76	0	10
2008-08-02	20:01:49	16.47	0	10
2008-08-02	20:16:49	21.18	0	10
2008-08-02	20:31:49	25.29	0	10
2008-08-02	20:46:49	25.29	0	10
2008-08-02	21:01:49	31.76	0	10
2008-08-02	21:16:49	34.71	0	10
2008-08-02	21:31:49	43.53	0	10
2008-08-02	21:46:49	48.82	0	10
2008-08-02	22:01:49	92.35	0	10
2008-08-02	22:16:49	74.12	0	10
2008-08-02	22:31:49	70.59	0	10
2008-08-02	22:46:49	71.76	0	10
2008-08-02	23:01:49	87.65	0	10
2008-08-02	23:16:49	78.24	0	10
2008-08-02	23:31:49	94.12	0	10
2008-08-02	23:46:49	93.53	0	10
2008-08-03	00:01:49	100	0	10
2008-08-03	00:16:49	88.24	0	10
2008-08-03	00:31:49	85.29	0	10
2008-08-03	00:46:49	88.82	0	10
2008-08-03	01:01:49	98.24	0	10
2008-08-03	01:16:49	82.35	0	10
2008-08-03	01:31:49	83.53	0	10
2008-08-03	01:46:49	82.94	0	10
2008-08-03	02:01:49	81.76	0	10
2008-08-03	02:16:49	80	0	10
2008-08-03	02:31:49	79.41	0	10
2008-08-03	02:46:49	87.65	0	10
2008-08-03	03:01:49	79.41	0	10
2008-08-03	03:16:49	84.71	0	10
2008-08-03	03:31:49	82.94	0	10
2008-08-03	03:46:49	94.71	0	10
2008-08-03	04:01:49	93.53	0	10
2008-08-03	04:16:49	92.94	0	10
2008-08-03	04:31:49	90.59	0	10
2008-08-03	04:46:49	92.35	0	10
2008-08-03	05:01:49	94.71	0	10
2008-08-03	05:16:49	90.59	0	10
2008-08-03	05:31:49	87.65	0	10
2008-08-03	05:46:49	85.29	0	10
2008-08-03	06:01:49	80.59	0	10
2008-08-03	06:16:49	78.24	0	10
2008-08-03	06:31:49	77.65	0	10
2008-08-03	06:46:49	77.65	0	10
2008-08-03	07:01:49	84.71	0	10
2008-08-03	07:16:49	88.24	0	10
2008-08-03	07:31:49	83.53	0	10
2008-08-03	07:46:49	76.47	0	10
2008-08-03	08:01:49	75.88	0	10
2008-08-03	08:16:49	75.88	0	10
2008-08-03	08:31:49	95.29	0	10
2008-08-03	08:46:49	100	0	10
2008-08-03	09:01:49	8.24	0	10
2008-08-03	09:16:49	5.29	0	10
2008-08-03	09:31:49	5.29	0	11
2008-08-03	09:46:49	5.29	0	11
2008-08-03	10:01:49	5.29	0	11
2008-08-03	10:16:49	4.71	0	11
2008-08-03	10:31:49	4.71	0	11
2008-08-03	10:46:49	4.71	0	11
2008-08-03	11:01:49	4.71	0	11
2008-08-03	11:16:49	4.71	0	11
2008-08-03	11:31:49	4.71	0	11
2008-08-03	11:46:49	4.71	0	11
2008-08-03	12:01:49	4.71	0	11
2008-08-03	12:16:49	4.71	0	11
2008-08-03	12:31:49	4.71	0	11
2008-08-03	12:46:49	4.71	0	11
2008-08-03	13:01:49	4.12	0	11
2008-08-03	13:16:49	4.71	0	11
2008-08-03	13:31:49	4.71	0	11
2008-08-03	13:46:49	4.71	0	11
2008-08-03	14:01:49	4.71	0	11
2008-08-03	14:16:49	4.71	0	11
2008-08-03	14:31:49	4.71	0	11
2008-08-03	14:46:49	4.12	0	11
2008-08-03	15:01:49	13.53	0	11
2008-08-03	15:16:49	5.29	0	11
2008-08-03	15:31:49	5.29	0	11
2008-08-03	15:46:49	5.88	0	11
2008-08-03	16:01:49	7.06	0	11
2008-08-03	16:16:49	18.82	0	11
2008-08-03	16:31:49	8.24	0	11
2008-08-03	16:46:49	8.24	0	11
2008-08-03	17:01:49	8.24	0	11
2008-08-03	17:16:49	10	0	11
2008-08-03	17:31:49	10	0	11
2008-08-03	17:46:49	9.41	0	11
2008-08-03	18:01:49	10.59	0	11
2008-08-03	18:16:49	10	0	11
2008-08-03	18:31:49	11.76	0	11
2008-08-03	18:46:49	12.94	0	11
2008-08-03	19:01:49	8.82	0	11
2008-08-03	19:16:49	7.06	0	11
2008-08-03	19:31:49	7.65	0	11
2008-08-03	19:46:49	14.71	0	11
2008-08-03	20:01:49	23.53	0	11
2008-08-03	20:16:49	35.88	0	11
2008-08-03	20:31:49	51.76	0	11
2008-08-03	20:46:49	61.76	0	11
2008-08-03	21:01:49	59.41	0	11
2008-08-03	21:16:49	50.59	0	11
2008-08-03	21:31:49	48.82	0	11
2008-08-03	21:46:49	45.88	0	11
2008-08-03	22:01:49	44.12	0	11
2008-08-03	22:16:49	43.53	0	11
2008-08-03	22:31:49	43.53	0	11
2008-08-03	22:46:49	45.29	0	11
2008-08-03	23:01:49	47.06	0	11
2008-08-03	23:16:49	47.06	0	11
2008-08-03	23:31:49	47.06	0	11
2008-08-03	23:46:49	50	0	11
2008-08-04	00:01:49	47.06	0	11
2008-08-04	00:16:49	47.65	0	11
2008-08-04	00:31:49	48.24	0	11
2008-08-04	00:46:49	49.41	0	11
2008-08-04	01:01:49	50.59	0	11
2008-08-04	01:16:49	51.18	0	11
2008-08-04	01:31:49	55.29	0	11
2008-08-04	01:46:49	60	0	11
2008-08-04	02:01:49	65.88	0	11
2008-08-04	02:16:49	81.76	0	11
2008-08-04	02:31:49	93.53	0	11
2008-08-04	02:46:49	100	0	11
2008-08-04	03:01:49	98.82	0	11
2008-08-04	03:16:49	93.53	0	11
2008-08-04	03:31:49	100	0	11
2008-08-04	03:46:49	93.53	0	11
2008-08-04	04:01:49	100	0	11
2008-08-04	04:16:49	100	0	11
2008-08-04	04:31:49	100	0	11
2008-08-04	04:46:49	100	0	11
2008-08-04	05:01:49	100	0	11
2008-08-04	05:16:49	100	0	11
2008-08-04	05:31:49	100	0	11
2008-08-04	05:46:49	100	0	11
2008-08-04	06:01:49	100	0	11
2008-08-04	06:16:49	100	0	11
2008-08-04	06:31:49	100	0	11
2008-08-04	06:46:49	100	0	11
2008-08-04	07:01:49	100	0	11
2008-08-04	07:16:49	100	0	11
2008-08-04	07:31:49	100	0	11
2008-08-04	07:46:49	100	0	11
2008-08-04	08:01:49	100	0	11
2008-08-04	08:16:49	85.29	0	11
2008-08-04	08:31:49	64.71	0	11
2008-08-04	08:46:49	51.76	0	11
2008-08-04	09:01:49	40.59	0	11
2008-08-04	09:16:49	28.24	0	11
2008-08-04	07:31:49	100	0	12
2008-08-04	07:46:49	100	0	12
2008-08-04	08:01:49	100	0	12
2008-08-04	08:16:49	85.29	0	12
2008-08-04	08:31:49	64.71	0	12
2008-08-04	08:46:49	51.76	0	12
2008-08-04	09:01:49	40.59	0	12
2008-08-04	09:16:49	28.24	0	12
2008-08-04	09:31:49	25.88	0	12
2008-08-04	09:46:49	17.65	0	12
2008-08-04	10:01:49	14.12	0	12
2008-08-04	10:16:49	10.59	0	12
2008-08-04	10:31:49	8.24	0	12
2008-08-04	10:46:49	6.47	0	12
2008-08-04	11:01:49	6.47	0	12
2008-08-04	11:16:49	6.47	0	12
2008-08-04	11:31:49	5.88	0	12
2008-08-04	11:46:49	5.88	0	12
2008-08-04	12:01:49	5.88	0	12
2008-08-04	12:16:49	5.29	0	12
2008-08-04	12:31:49	5.29	0	12
2008-08-04	12:46:49	5.88	0	12
2008-08-04	13:01:49	5.29	0	12
2008-08-04	13:16:49	5.29	0	12
2008-08-04	13:31:49	5.29	0	12
2008-08-04	13:46:49	5.29	0	12
2008-08-04	14:01:49	5.29	0	12
2008-08-04	14:16:49	5.88	0	12
2008-08-04	14:31:49	5.29	0	12
2008-08-04	14:46:49	5.29	0	12
2008-08-04	15:01:49	4.71	0	12
2008-08-04	15:16:49	5.29	0	12
2008-08-04	15:31:49	5.29	0	12
2008-08-04	15:46:49	5.29	0	12
2008-08-04	16:01:49	5.29	0	12
2008-08-04	16:16:49	4.71	0	12
2008-08-04	16:31:49	4.71	0	12
2008-08-04	16:46:49	4.71	0	12
2008-08-04	17:01:49	4.71	0	12
2008-08-04	17:16:49	4.71	0	12
2008-08-04	17:31:49	4.71	0	12
2008-08-04	17:46:49	4.71	0	12
2008-08-04	18:01:49	4.71	0	12
2008-08-04	18:16:49	4.71	0	12
2008-08-04	18:31:49	4.12	0	12
2008-08-04	18:46:49	4.12	0	12
2008-08-04	19:01:49	4.12	0	12
2008-08-04	19:16:49	4.71	0	12
2008-08-04	19:31:49	4.71	0	12
2008-08-04	19:46:49	4.71	0	12
2008-08-04	20:01:49	4.12	0	12
2008-08-04	20:16:49	4.71	0	12
2008-08-04	20:31:49	7.06	0	12
2008-08-04	20:46:49	11.76	0	12
2008-08-04	21:01:49	14.71	0	12
2008-08-04	21:16:49	17.65	0	12
2008-08-04	21:31:49	24.71	0	12
2008-08-04	21:46:49	32.94	0	12
2008-08-04	22:01:49	40.59	0	12
2008-08-04	22:16:49	53.53	0	12
2008-08-04	22:31:49	74.71	0	12
2008-08-04	22:46:49	80	0	12
2008-08-04	23:01:49	81.76	0	12
2008-08-04	23:16:49	87.06	0	12
2008-08-04	23:31:49	91.18	0	12
2008-08-04	23:46:49	91.76	0	12
2008-08-05	00:01:49	93.53	0	12
2008-08-05	00:16:49	98.24	0	12
2008-08-05	00:31:49	100	0	12
2008-08-05	00:46:49	100	0	12
2008-08-05	01:01:49	100	0	12
2008-08-05	01:16:49	100	0	12
2008-08-05	01:31:49	100	0	12
2008-08-05	01:46:49	100	0	12
2008-08-05	02:01:49	100	0	12
2008-08-05	02:16:49	100	0	12
2008-08-05	02:31:49	100	0	12
2008-08-05	02:46:49	100	0	12
2008-08-05	03:01:49	100	0	12
2008-08-05	03:16:49	100	0	12
2008-08-05	03:31:49	100	0	12
2008-08-05	03:46:49	100	0	12
2008-08-05	04:01:49	100	0	12
2008-08-05	04:16:49	100	0	12
2008-08-05	04:31:49	100	0	12
2008-08-05	04:46:49	100	0	12
2008-08-05	05:01:49	100	0	12
2008-08-05	05:16:49	100	0	12
2008-08-05	05:31:49	100	0	12
2008-08-05	05:46:49	100	0	12
2008-08-05	06:01:49	100	0	12
2008-08-05	06:16:49	100	0	12
2008-08-05	06:31:49	100	0	12
2008-08-05	06:46:49	100	0	12
2008-08-05	07:01:49	100	0	12
2008-08-05	07:16:49	100	0	12
2008-10-14	12:16:14	7.06	1	1
2008-10-14	12:31:14	7.06	1	1
2008-10-14	12:46:14	7.06	1	1
2008-10-14	13:01:14	6.47	1	1
2008-10-14	13:16:14	6.47	1	1
2008-10-14	13:31:14	5.88	1	1
2008-10-14	13:46:14	5.88	1	1
2008-10-14	14:01:14	5.88	1	1
2008-10-14	14:16:14	5.88	1	1
2008-10-14	14:31:14	5.29	1	1
2008-10-14	14:46:14	5.29	1	1
2008-10-14	15:01:14	5.88	1	1
2008-10-14	15:16:14	5.29	1	1
2008-10-14	15:31:14	5.29	1	1
2008-10-14	15:46:14	4.71	1	1
2008-10-14	16:01:14	4.71	1	1
2008-10-14	16:16:14	4.71	1	1
2008-10-14	16:31:14	4.71	1	1
2008-10-14	16:46:14	4.71	1	1
2008-10-14	17:01:14	4.71	1	1
2008-10-14	17:16:14	4.71	1	1
2008-10-14	17:31:14	4.71	1	1
2008-10-14	17:46:14	4.71	1	1
2008-10-14	18:01:14	5.29	1	1
2008-10-14	18:16:14	8.24	1	1
2008-10-14	18:31:14	16.47	1	1
2008-10-14	18:46:14	18.82	1	1
2008-10-14	19:01:14	20	1	1
2008-10-14	19:16:14	24.71	1	1
2008-10-14	19:31:14	27.06	1	1
2008-10-14	19:46:14	27.65	1	1
2008-10-14	20:01:14	28.82	1	1
2008-10-14	20:16:14	28.82	1	1
2008-10-14	20:31:14	39.41	1	1
2008-10-14	20:46:14	40.59	1	1
2008-10-14	21:01:14	37.06	1	1
2008-10-14	21:16:14	34.12	1	1
2008-10-14	21:31:14	34.71	1	1
2008-10-14	21:46:14	34.12	1	1
2008-10-14	22:01:14	55.88	1	1
2008-10-14	22:16:14	75.29	1	1
2008-10-14	22:31:14	79.41	1	1
2008-10-14	22:46:14	84.71	1	1
2008-10-14	23:01:14	84.71	1	1
2008-10-14	23:16:14	85.88	1	1
2008-10-14	23:31:14	93.53	1	1
2008-10-14	23:46:14	100	1	1
2008-10-15	00:01:14	100	1	1
2008-10-15	00:16:14	100	1	1
2008-10-15	00:31:14	100	1	1
2008-10-15	00:46:14	100	1	1
2008-10-15	01:01:14	100	1	1
2008-10-15	01:16:14	100	1	1
2008-10-15	01:31:14	100	1	1
2008-10-15	01:46:14	100	1	1
2008-10-15	02:01:14	100	1	1
2008-10-15	02:16:14	100	1	1
2008-10-15	02:31:14	100	1	1
2008-10-15	02:46:14	100	1	1
2008-10-15	03:01:14	100	1	1
2008-10-15	03:16:14	100	1	1
2008-10-15	03:31:14	100	1	1
2008-10-15	03:46:14	100	1	1
2008-10-15	04:01:14	100	1	1
2008-10-15	04:16:14	100	1	1
2008-10-15	04:31:14	100	1	1
2008-10-15	04:46:14	100	1	1
2008-10-15	05:01:14	100	1	1
2008-10-15	05:16:14	100	1	1
2008-10-15	05:31:14	100	1	1
2008-10-15	05:46:14	100	1	1
2008-10-15	06:01:14	100	1	1
2008-10-15	06:16:14	100	1	1
2008-10-15	06:31:14	100	1	1
2008-10-15	06:46:14	100	1	1
2008-10-15	07:01:14	100	1	1
2008-10-15	07:16:14	100	1	1
2008-10-15	07:31:14	100	1	1
2008-10-15	07:46:14	62.35	1	1
2008-10-15	08:01:14	100	1	1
2008-10-15	08:16:14	100	1	1
2008-10-15	08:31:14	100	1	1
2008-10-15	08:46:14	100	1	1
2008-10-15	09:01:14	100	1	1
2008-10-15	09:16:14	100	1	1
2008-10-15	09:31:14	100	1	1
2008-10-15	09:46:14	100	1	1
2008-10-15	10:01:14	63.53	1	1
2008-10-15	10:16:14	100	1	1
2008-10-15	10:31:14	100	1	1
2008-10-15	10:46:14	45.29	1	1
2008-10-15	11:01:14	17.65	1	1
2008-10-15	11:16:14	14.12	1	1
2008-10-15	11:31:14	14.12	1	1
2008-10-15	11:46:14	10	1	1
2008-10-15	12:01:14	8.24	1	1
2008-10-15	10:16:14	100	1	2
2008-10-15	10:31:14	100	1	2
2008-10-15	10:46:14	45.29	1	2
2008-10-15	11:01:14	17.65	1	2
2008-10-15	11:16:14	14.12	1	2
2008-10-15	11:31:14	14.12	1	2
2008-10-15	11:46:14	10	1	2
2008-10-15	12:01:14	8.24	1	2
2008-10-15	12:16:14	8.82	1	2
2008-10-15	12:31:14	7.06	1	2
2008-10-15	12:46:14	6.47	1	2
2008-10-15	13:01:14	6.47	1	2
2008-10-15	13:16:14	6.47	1	2
2008-10-15	13:31:14	6.47	1	2
2008-10-15	13:46:14	5.88	1	2
2008-10-15	14:01:14	5.88	1	2
2008-10-15	14:16:14	5.88	1	2
2008-10-15	14:31:14	5.88	1	2
2008-10-15	14:46:14	5.88	1	2
2008-10-15	15:01:14	5.88	1	2
2008-10-15	15:16:14	5.88	1	2
2008-10-15	15:31:14	5.88	1	2
2008-10-15	15:46:14	5.29	1	2
2008-10-15	16:01:14	5.29	1	2
2008-10-15	16:16:14	5.88	1	2
2008-10-15	16:31:14	5.29	1	2
2008-10-15	16:46:14	5.29	1	2
2008-10-15	17:01:14	5.29	1	2
2008-10-15	17:16:14	5.29	1	2
2008-10-15	17:31:14	5.29	1	2
2008-10-15	17:46:14	5.88	1	2
2008-10-15	18:01:14	6.47	1	2
2008-10-15	18:16:14	8.24	1	2
2008-10-15	18:31:14	13.53	1	2
2008-10-15	18:46:14	14.71	1	2
2008-10-15	19:01:14	17.06	1	2
2008-10-15	19:16:14	15.88	1	2
2008-10-15	19:31:14	15.29	1	2
2008-10-15	19:46:14	14.71	1	2
2008-10-15	20:01:14	15.29	1	2
2008-10-15	20:16:14	14.71	1	2
2008-10-15	20:31:14	14.71	1	2
2008-10-15	20:46:14	15.29	1	2
2008-10-15	21:01:14	18.82	1	2
2008-10-15	21:16:14	27.06	1	2
2008-10-15	21:31:14	28.24	1	2
2008-10-15	21:46:14	37.06	1	2
2008-10-15	22:01:14	51.76	1	2
2008-10-15	22:16:14	74.12	1	2
2008-10-15	22:31:14	79.41	1	2
2008-10-15	22:46:14	100	1	2
2008-10-15	23:01:14	100	1	2
2008-10-15	23:16:14	100	1	2
2008-10-15	23:31:14	100	1	2
2008-10-15	23:46:14	100	1	2
2008-10-16	00:01:14	100	1	2
2008-10-16	00:16:14	100	1	2
2008-10-16	00:31:14	100	1	2
2008-10-16	00:46:14	100	1	2
2008-10-16	01:01:14	100	1	2
2008-10-16	01:16:14	100	1	2
2008-10-16	01:31:14	100	1	2
2008-10-16	01:46:14	100	1	2
2008-10-16	02:01:14	100	1	2
2008-10-16	02:16:14	100	1	2
2008-10-16	02:31:14	100	1	2
2008-10-16	02:46:14	100	1	2
2008-10-16	03:01:14	100	1	2
2008-10-16	03:16:14	100	1	2
2008-10-16	03:31:14	100	1	2
2008-10-16	03:46:14	100	1	2
2008-10-16	04:01:14	100	1	2
2008-10-16	04:16:14	100	1	2
2008-10-16	04:31:14	100	1	2
2008-10-16	04:46:14	100	1	2
2008-10-16	05:01:14	100	1	2
2008-10-16	05:16:14	100	1	2
2008-10-16	05:31:14	100	1	2
2008-10-16	05:46:14	100	1	2
2008-10-16	06:01:14	100	1	2
2008-10-16	06:16:14	100	1	2
2008-10-16	06:31:14	100	1	2
2008-10-16	06:46:14	100	1	2
2008-10-16	07:01:14	100	1	2
2008-10-16	07:16:14	100	1	2
2008-10-16	07:31:14	100	1	2
2008-10-16	07:46:14	94.71	1	2
2008-10-16	08:01:14	71.18	1	2
2008-10-16	08:16:14	62.35	1	2
2008-10-16	08:31:14	60	1	2
2008-10-16	08:46:14	48.24	1	2
2008-10-16	09:01:14	39.41	1	2
2008-10-16	09:16:14	36.47	1	2
2008-10-16	09:31:14	34.12	1	2
2008-10-16	09:46:14	30.59	1	2
2008-10-16	10:01:14	25.29	1	2
2008-10-16	08:01:14	71.18	1	3
2008-10-16	08:16:14	62.35	1	3
2008-10-16	08:31:14	60	1	3
2008-10-16	08:46:14	48.24	1	3
2008-10-16	09:01:14	39.41	1	3
2008-10-16	09:16:14	36.47	1	3
2008-10-16	09:31:14	34.12	1	3
2008-10-16	09:46:14	30.59	1	3
2008-10-16	10:01:14	25.29	1	3
2008-10-16	10:16:14	22.35	1	3
2008-10-16	10:31:14	17.65	1	3
2008-10-16	10:46:14	16.47	1	3
2008-10-16	11:01:14	14.12	1	3
2008-10-16	11:16:14	10.59	1	3
2008-10-16	11:31:14	7.06	1	3
2008-10-16	11:46:14	6.47	1	3
2008-10-16	12:01:14	5.88	1	3
2008-10-16	12:16:14	5.29	1	3
2008-10-16	12:31:14	5.88	1	3
2008-10-16	12:46:14	5.88	1	3
2008-10-16	13:01:14	5.88	1	3
2008-10-16	13:16:14	6.47	1	3
2008-10-16	13:31:14	5.88	1	3
2008-10-16	13:46:14	5.88	1	3
2008-10-16	14:01:14	5.88	1	3
2008-10-16	14:16:14	5.88	1	3
2008-10-16	14:31:14	5.88	1	3
2008-10-16	14:46:14	5.29	1	3
2008-10-16	15:01:14	5.29	1	3
2008-10-16	15:16:14	4.71	1	3
2008-10-16	15:31:14	4.71	1	3
2008-10-16	15:46:14	4.71	1	3
2008-10-16	16:01:14	4.71	1	3
2008-10-16	16:16:14	4.71	1	3
2008-10-16	16:31:14	4.12	1	3
2008-10-16	16:46:14	4.12	1	3
2008-10-16	17:01:14	4.12	1	3
2008-10-16	17:16:14	4.12	1	3
2008-10-16	17:31:14	4.12	1	3
2008-10-16	17:46:14	4.12	1	3
2008-10-16	18:01:14	3.53	1	3
2008-10-16	18:16:14	3.53	1	3
2008-10-16	18:31:14	4.12	1	3
2008-10-16	18:46:14	4.71	1	3
2008-10-16	19:01:14	4.71	1	3
2008-10-16	19:16:14	14.12	1	3
2008-10-16	19:31:14	19.41	1	3
2008-10-16	19:46:14	20.59	1	3
2008-10-16	20:01:14	27.65	1	3
2008-10-16	20:16:14	27.06	1	3
2008-10-16	20:31:14	25.88	1	3
2008-10-16	20:46:14	22.35	1	3
2008-10-16	21:01:14	22.94	1	3
2008-10-16	21:16:14	21.76	1	3
2008-10-16	21:31:14	24.71	1	3
2008-10-16	21:46:14	29.41	1	3
2008-10-16	22:01:14	72.94	1	3
2008-10-16	22:16:14	70	1	3
2008-10-16	22:31:14	46.47	1	3
2008-10-16	22:46:14	33.53	1	3
2008-10-16	23:01:14	29.41	1	3
2008-10-16	23:16:14	33.53	1	3
2008-10-16	23:31:14	40	1	3
2008-10-16	23:46:14	20.59	1	3
2008-10-17	00:01:14	15.88	1	3
2008-10-17	00:16:14	8.24	1	3
2008-10-17	00:31:14	8.24	1	3
2008-10-17	00:46:14	8.82	1	3
2008-10-17	01:01:14	7.06	1	3
2008-10-17	01:16:14	6.47	1	3
2008-10-17	01:31:14	5.29	1	3
2008-10-17	01:46:14	4.71	1	3
2008-10-17	02:01:14	4.12	1	3
2008-10-17	02:16:14	4.12	1	3
2008-10-17	02:31:14	3.53	1	3
2008-10-17	02:46:14	3.53	1	3
2008-10-17	03:01:14	3.53	1	3
2008-10-17	03:16:14	3.53	1	3
2008-10-17	03:31:14	3.53	1	3
2008-10-17	03:46:14	3.53	1	3
2008-10-17	04:01:14	3.53	1	3
2008-10-17	04:16:14	3.53	1	3
2008-10-17	04:31:14	2.94	1	3
2008-10-17	04:46:14	3.53	1	3
2008-10-17	05:01:14	2.94	1	3
2008-10-17	05:16:14	2.94	1	3
2008-10-17	05:31:14	2.94	1	3
2008-10-17	05:46:14	2.94	1	3
2008-10-17	06:01:14	2.94	1	3
2008-10-17	06:16:14	2.94	1	3
2008-10-17	06:31:14	2.94	1	3
2008-10-17	06:46:14	3.53	1	3
2008-10-17	07:01:14	2.94	1	3
2008-10-17	07:16:14	3.53	1	3
2008-10-17	07:31:14	3.53	1	3
2008-10-17	07:46:14	3.53	1	3
2008-10-17	08:16:14	3.53	1	4
2008-10-17	08:31:14	3.53	1	4
2008-10-17	08:46:14	3.53	1	4
2008-10-17	09:01:14	3.53	1	4
2008-10-17	09:16:14	4.12	1	4
2008-10-17	09:31:14	3.53	1	4
2008-10-17	09:46:14	3.53	1	4
2008-10-17	10:01:14	3.53	1	4
2008-10-17	10:16:14	4.12	1	4
2008-10-17	10:31:14	4.12	1	4
2008-10-17	10:46:14	4.12	1	4
2008-10-17	11:01:14	4.12	1	4
2008-10-17	11:16:14	4.12	1	4
2008-10-17	11:31:14	4.71	1	4
2008-10-17	11:46:14	4.71	1	4
2008-10-17	12:01:14	4.71	1	4
2008-10-17	12:16:14	4.71	1	4
2008-10-17	12:31:14	4.71	1	4
2008-10-17	12:46:14	5.29	1	4
2008-10-17	13:01:14	5.29	1	4
2008-10-17	13:16:14	5.29	1	4
2008-10-17	13:31:14	5.29	1	4
2008-10-17	13:46:14	5.29	1	4
2008-10-17	14:01:14	4.71	1	4
2008-10-17	14:16:14	4.71	1	4
2008-10-17	14:31:14	4.71	1	4
2008-10-17	14:46:14	4.71	1	4
2008-10-17	15:01:14	4.71	1	4
2008-10-17	15:16:14	4.71	1	4
2008-10-17	15:31:14	4.71	1	4
2008-10-17	15:46:14	4.71	1	4
2008-10-17	16:01:14	4.71	1	4
2008-10-17	16:16:14	4.12	1	4
2008-10-17	16:31:14	4.12	1	4
2008-10-17	16:46:14	4.12	1	4
2008-10-17	17:01:14	3.53	1	4
2008-10-17	17:16:14	4.12	1	4
2008-10-17	17:31:14	4.12	1	4
2008-10-17	17:46:14	4.12	1	4
2008-10-17	18:01:14	7.06	1	4
2008-10-17	18:16:14	22.35	1	4
2008-10-17	18:31:14	28.82	1	4
2008-10-17	18:46:14	31.76	1	4
2008-10-17	19:01:14	34.12	1	4
2008-10-17	19:16:14	35.88	1	4
2008-10-17	19:31:14	37.06	1	4
2008-10-17	19:46:14	37.65	1	4
2008-10-17	20:01:14	37.06	1	4
2008-10-17	20:16:14	38.82	1	4
2008-10-17	20:31:14	40.59	1	4
2008-10-17	20:46:14	41.76	1	4
2008-10-17	21:01:14	45.29	1	4
2008-10-17	21:16:14	51.76	1	4
2008-10-17	21:31:14	53.53	1	4
2008-10-17	21:46:14	59.41	1	4
2008-10-17	22:01:14	59.41	1	4
2008-10-17	22:16:14	59.41	1	4
2008-10-17	22:31:14	62.94	1	4
2008-10-17	22:46:14	70	1	4
2008-10-17	23:01:14	81.76	1	4
2008-10-17	23:16:14	88.24	1	4
2008-10-17	23:31:14	95.88	1	4
2008-10-17	23:46:14	100	1	4
2008-10-18	00:01:14	100	1	4
2008-10-18	00:16:14	100	1	4
2008-10-18	00:31:14	100	1	4
2008-10-18	00:46:14	100	1	4
2008-10-18	01:01:14	100	1	4
2008-10-18	01:16:14	100	1	4
2008-10-18	01:31:14	100	1	4
2008-10-18	01:46:14	100	1	4
2008-10-18	02:01:14	100	1	4
2008-10-18	02:16:14	100	1	4
2008-10-18	02:31:14	100	1	4
2008-10-18	02:46:14	100	1	4
2008-10-18	03:01:14	100	1	4
2008-10-18	03:16:14	100	1	4
2008-10-18	03:31:14	100	1	4
2008-10-18	03:46:14	100	1	4
2008-10-18	04:01:14	100	1	4
2008-10-18	04:16:14	100	1	4
2008-10-18	04:31:14	100	1	4
2008-10-18	04:46:14	100	1	4
2008-10-18	05:01:14	100	1	4
2008-10-18	05:16:14	100	1	4
2008-10-18	05:31:14	100	1	4
2008-10-18	05:46:14	100	1	4
2008-10-18	06:01:14	100	1	4
2008-10-18	06:16:14	100	1	4
2008-10-18	06:31:14	100	1	4
2008-10-18	06:46:14	100	1	4
2008-10-18	07:01:14	100	1	4
2008-10-18	07:16:14	100	1	4
2008-10-18	07:31:14	100	1	4
2008-10-18	07:46:14	100	1	4
2008-10-18	08:01:14	100	1	4
2008-10-18	09:16:14	94.71	1	5
2008-10-18	09:31:14	90.59	1	5
2008-10-18	09:46:14	88.82	1	5
2008-10-18	10:01:14	86.47	1	5
2008-10-18	10:16:14	84.71	1	5
2008-10-18	10:31:14	81.76	1	5
2008-10-18	10:46:14	78.24	1	5
2008-10-18	11:01:14	67.06	1	5
2008-10-18	11:16:14	50.59	1	5
2008-10-18	11:31:14	24.71	1	5
2008-10-18	11:46:14	14.12	1	5
2008-10-18	12:01:14	8.82	1	5
2008-10-18	12:16:14	8.82	1	5
2008-10-18	12:31:14	8.24	1	5
2008-10-18	12:46:14	7.06	1	5
2008-10-18	13:01:14	6.47	1	5
2008-10-18	13:16:14	6.47	1	5
2008-10-18	13:31:14	5.88	1	5
2008-10-18	13:46:14	5.88	1	5
2008-10-18	14:01:14	5.88	1	5
2008-10-18	14:16:14	5.88	1	5
2008-10-18	14:31:14	5.88	1	5
2008-10-18	14:46:14	5.29	1	5
2008-10-18	15:01:14	5.29	1	5
2008-10-18	15:16:14	5.29	1	5
2008-10-18	15:31:14	5.29	1	5
2008-10-18	15:46:14	5.29	1	5
2008-10-18	16:01:14	5.29	1	5
2008-10-18	16:16:14	5.29	1	5
2008-10-18	16:31:14	5.29	1	5
2008-10-18	16:46:14	18.24	1	5
2008-10-18	17:01:14	44.12	1	5
2008-10-18	17:16:14	77.65	1	5
2008-10-18	17:31:14	87.65	1	5
2008-10-18	17:46:14	90.59	1	5
2008-10-18	18:01:14	97.65	1	5
2008-10-18	18:16:14	100	1	5
2008-10-18	18:31:14	100	1	5
2008-10-18	18:46:14	100	1	5
2008-10-18	19:01:14	100	1	5
2008-10-18	19:16:14	100	1	5
2008-10-18	19:31:14	100	1	5
2008-10-18	19:46:14	100	1	5
2008-10-18	20:01:14	100	1	5
2008-10-18	20:16:14	100	1	5
2008-10-18	20:31:14	100	1	5
2008-10-18	20:46:14	100	1	5
2008-10-18	21:01:14	100	1	5
2008-10-18	21:16:14	100	1	5
2008-10-18	21:31:14	100	1	5
2008-10-18	21:46:14	100	1	5
2008-10-18	22:01:14	100	1	5
2008-10-18	22:16:14	100	1	5
2008-10-18	22:31:14	100	1	5
2008-10-18	22:46:14	100	1	5
2008-10-18	23:01:14	100	1	5
2008-10-18	23:16:14	100	1	5
2008-10-18	23:31:14	100	1	5
2008-10-18	23:46:14	100	1	5
2008-10-19	00:01:14	100	1	5
2008-10-19	00:16:14	100	1	5
2008-10-19	00:31:14	100	1	5
2008-10-19	00:46:14	100	1	5
2008-10-19	01:01:14	100	1	5
2008-10-19	01:16:14	100	1	5
2008-10-19	01:31:14	100	1	5
2008-10-19	01:46:14	100	1	5
2008-10-19	02:01:14	100	1	5
2008-10-19	02:16:14	100	1	5
2008-10-19	02:31:14	100	1	5
2008-10-19	02:46:14	100	1	5
2008-10-19	03:01:14	100	1	5
2008-10-19	03:16:14	100	1	5
2008-10-19	03:31:14	100	1	5
2008-10-19	03:46:14	100	1	5
2008-10-19	04:01:14	100	1	5
2008-10-19	04:16:14	100	1	5
2008-10-19	04:31:14	100	1	5
2008-10-19	04:46:14	100	1	5
2008-10-19	05:01:14	100	1	5
2008-10-19	05:16:14	100	1	5
2008-10-19	05:31:14	100	1	5
2008-10-19	05:46:14	100	1	5
2008-10-19	06:01:14	100	1	5
2008-10-19	06:16:14	100	1	5
2008-10-19	06:31:14	100	1	5
2008-10-19	06:46:14	100	1	5
2008-10-19	07:01:14	100	1	5
2008-10-19	07:16:14	100	1	5
2008-10-19	07:31:14	100	1	5
2008-10-19	07:46:14	100	1	5
2008-10-19	08:01:14	100	1	5
2008-10-19	08:16:14	100	1	5
2008-10-19	08:31:14	100	1	5
2008-10-19	08:46:14	100	1	5
2008-10-19	09:01:14	100	1	5
2008-10-19	07:31:14	100	1	6
2008-10-19	07:46:14	100	1	6
2008-10-19	08:01:14	100	1	6
2008-10-19	08:16:14	100	1	6
2008-10-19	08:31:14	100	1	6
2008-10-19	08:46:14	100	1	6
2008-10-19	09:01:14	100	1	6
2008-10-19	09:16:14	98.24	1	6
2008-10-19	09:31:14	83.53	1	6
2008-10-19	09:46:14	67.65	1	6
2008-10-19	10:01:14	34.71	1	6
2008-10-19	10:16:14	44.71	1	6
2008-10-19	10:31:14	27.65	1	6
2008-10-19	10:46:14	13.53	1	6
2008-10-19	11:01:14	11.76	1	6
2008-10-19	11:16:14	10.59	1	6
2008-10-19	11:31:14	10.59	1	6
2008-10-19	11:46:14	9.41	1	6
2008-10-19	12:01:14	9.41	1	6
2008-10-19	12:16:14	8.24	1	6
2008-10-19	12:31:14	8.24	1	6
2008-10-19	12:46:14	8.82	1	6
2008-10-19	13:01:14	8.24	1	6
2008-10-19	13:16:14	10	1	6
2008-10-19	13:31:14	10	1	6
2008-10-19	13:46:14	8.82	1	6
2008-10-19	14:01:14	9.41	1	6
2008-10-19	14:16:14	8.82	1	6
2008-10-19	14:31:14	7.65	1	6
2008-10-19	14:46:14	8.24	1	6
2008-10-19	15:01:14	7.65	1	6
2008-10-19	15:16:14	7.65	1	6
2008-10-19	15:31:14	7.06	1	6
2008-10-19	15:46:14	5.88	1	6
2008-10-19	16:01:14	5.29	1	6
2008-10-19	16:16:14	5.29	1	6
2008-10-19	16:31:14	5.29	1	6
2008-10-19	16:46:14	4.71	1	6
2008-10-19	17:01:14	4.71	1	6
2008-10-19	17:16:14	4.71	1	6
2008-10-19	17:31:14	4.71	1	6
2008-10-19	17:46:14	4.71	1	6
2008-10-19	18:01:14	5.29	1	6
2008-10-19	18:16:14	6.47	1	6
2008-10-19	18:31:14	7.06	1	6
2008-10-19	18:46:14	7.06	1	6
2008-10-19	19:01:14	6.47	1	6
2008-10-19	19:16:14	7.06	1	6
2008-10-19	19:31:14	7.06	1	6
2008-10-19	19:46:14	7.06	1	6
2008-10-19	20:01:14	7.06	1	6
2008-10-19	20:16:14	7.65	1	6
2008-10-19	20:31:14	8.82	1	6
2008-10-19	20:46:14	8.82	1	6
2008-10-19	21:01:14	9.41	1	6
2008-10-19	21:16:14	10	1	6
2008-10-19	21:31:14	11.18	1	6
2008-10-19	21:46:14	10.59	1	6
2008-10-19	22:01:14	12.35	1	6
2008-10-19	22:16:14	15.88	1	6
2008-10-19	22:31:14	19.41	1	6
2008-10-19	22:46:14	23.53	1	6
2008-10-19	23:01:14	23.53	1	6
2008-10-19	23:16:14	17.65	1	6
2008-10-19	23:31:14	18.24	1	6
2008-10-19	23:46:14	19.41	1	6
2008-10-20	00:01:14	35.88	1	6
2008-10-20	00:16:14	24.71	1	6
2008-10-20	00:31:14	25.29	1	6
2008-10-20	00:46:14	22.35	1	6
2008-10-20	01:01:14	20.59	1	6
2008-10-20	01:16:14	21.76	1	6
2008-10-20	01:31:14	24.71	1	6
2008-10-20	01:46:14	28.82	1	6
2008-10-20	02:01:14	28.82	1	6
2008-10-20	02:16:14	30	1	6
2008-10-20	02:31:14	25.88	1	6
2008-10-20	02:46:14	25.29	1	6
2008-10-20	03:01:14	25.88	1	6
2008-10-20	03:16:14	28.82	1	6
2008-10-20	03:31:14	30.59	1	6
2008-10-20	03:46:14	33.53	1	6
2008-10-20	04:01:14	32.94	1	6
2008-10-20	04:16:14	32.35	1	6
2008-10-20	04:31:14	38.82	1	6
2008-10-20	04:46:14	30.59	1	6
2008-10-20	05:01:14	34.12	1	6
2008-10-20	05:16:14	35.88	1	6
2008-10-20	05:31:14	31.76	1	6
2008-10-20	05:46:14	41.18	1	6
2008-10-20	06:01:14	45.29	1	6
2008-10-20	06:16:14	34.12	1	6
2008-10-20	06:31:14	37.65	1	6
2008-10-20	06:46:14	62.94	1	6
2008-10-20	07:01:14	52.35	1	6
2008-10-20	07:16:14	41.18	1	6
2008-10-20	08:01:14	29.41	1	7
2008-10-20	08:16:14	25.29	1	7
2008-10-20	08:31:14	100	1	7
2008-10-20	08:46:14	81.18	1	7
2008-10-20	09:01:14	47.06	1	7
2008-10-20	09:16:14	100	1	7
2008-10-20	09:31:14	100	1	7
2008-10-20	09:46:14	100	1	7
2008-10-20	10:01:14	100	1	7
2008-10-20	10:16:14	100	1	7
2008-10-20	10:31:14	38.82	1	7
2008-10-20	10:46:14	15.88	1	7
2008-10-20	11:01:14	11.76	1	7
2008-10-20	09:46:14	100	1	8
2008-10-20	10:01:14	100	1	8
2008-10-20	10:16:14	100	1	8
2008-10-20	10:31:14	38.82	1	8
2008-10-20	10:46:14	15.88	1	8
2008-10-20	11:01:14	11.76	1	8
2008-10-20	11:16:14	12.94	1	8
2008-10-20	11:31:14	10	1	8
2008-10-20	11:46:14	10	1	8
2008-10-20	12:01:14	10	1	8
2008-10-20	12:16:14	7.65	1	8
2008-10-20	12:31:14	6.47	1	8
2008-10-20	12:46:14	6.47	1	8
2008-10-20	13:01:14	5.88	1	8
2008-10-20	13:16:14	4.71	1	8
2008-10-20	13:31:14	4.71	1	8
2008-10-20	13:46:14	5.29	1	8
2008-10-20	14:01:14	5.29	1	8
2008-10-20	14:16:14	4.71	1	8
2008-10-20	14:31:14	4.71	1	8
2008-10-20	14:46:14	4.71	1	8
2008-10-20	15:01:14	4.71	1	8
2008-10-20	15:16:14	4.71	1	8
2008-10-20	15:31:14	4.71	1	8
2008-10-20	15:46:14	4.71	1	8
2008-10-20	16:01:14	4.12	1	8
2008-10-20	16:16:14	4.71	1	8
2008-10-20	16:31:14	4.12	1	8
2008-10-20	16:46:14	4.12	1	8
2008-10-20	17:01:14	4.12	1	8
2008-10-20	17:16:14	4.12	1	8
2008-10-20	17:31:14	4.12	1	8
2008-10-20	17:46:14	4.71	1	8
2008-10-20	18:01:14	5.88	1	8
2008-10-20	18:16:14	7.06	1	8
2008-10-20	18:31:14	10.59	1	8
2008-10-20	18:46:14	11.18	1	8
2008-10-20	19:01:14	11.76	1	8
2008-10-20	19:16:14	13.53	1	8
2008-10-20	19:31:14	11.76	1	8
2008-10-20	19:46:14	11.76	1	8
2008-10-20	20:01:14	11.76	1	8
2008-10-20	20:16:14	11.76	1	8
2008-10-20	20:31:14	10.59	1	8
2008-10-20	20:46:14	10.59	1	8
2008-10-20	21:01:14	11.18	1	8
2008-10-20	21:16:14	11.18	1	8
2008-10-20	21:31:14	11.18	1	8
2008-10-20	21:46:14	11.18	1	8
2008-10-20	22:01:14	11.18	1	8
2008-10-20	22:16:14	10.59	1	8
2008-10-20	22:31:14	10	1	8
2008-10-20	22:46:14	10	1	8
2008-10-20	23:01:14	9.41	1	8
2008-10-20	23:16:14	9.41	1	8
2008-10-20	23:31:14	8.82	1	8
2008-10-20	23:46:14	8.82	1	8
2008-10-21	00:01:14	10	1	8
2008-10-21	00:16:14	10.59	1	8
2008-10-21	00:31:14	10.59	1	8
2008-10-21	00:46:14	11.76	1	8
2008-10-21	01:01:14	34.12	1	8
2008-10-21	01:16:14	100	1	8
2008-10-21	01:31:14	100	1	8
2008-10-21	01:46:14	100	1	8
2008-10-21	02:01:14	100	1	8
2008-10-21	02:16:14	100	1	8
2008-10-21	02:31:14	95.88	1	8
2008-10-21	02:46:14	86.47	1	8
2008-10-21	03:01:14	93.53	1	8
2008-10-21	03:16:14	90.59	1	8
2008-10-21	03:31:14	98.24	1	8
2008-10-21	03:46:14	100	1	8
2008-10-21	04:01:14	100	1	8
2008-10-21	04:16:14	100	1	8
2008-10-21	04:31:14	100	1	8
2008-10-21	04:46:14	94.12	1	8
2008-10-21	05:01:14	100	1	8
2008-10-21	05:16:14	92.35	1	8
2008-10-21	05:31:14	95.29	1	8
2008-10-21	05:46:14	98.24	1	8
2008-10-21	06:01:14	94.12	1	8
2008-10-21	06:16:14	87.65	1	8
2008-10-21	06:31:14	79.41	1	8
2008-10-21	06:46:14	80.59	1	8
2008-10-21	07:01:14	100	1	8
2008-10-21	07:16:14	88.24	1	8
2008-10-21	07:31:14	91.18	1	8
2008-10-21	07:46:14	87.65	1	8
2008-10-21	08:01:14	84.71	1	8
2008-10-21	08:16:14	89.41	1	8
2008-10-21	08:31:14	81.76	1	8
2008-10-21	08:46:14	59.41	1	8
2008-10-21	09:01:14	57.65	1	8
2008-10-21	09:16:14	48.82	1	8
2008-10-21	09:31:14	38.24	1	8
2008-10-21	08:01:14	84.71	1	9
2008-10-21	08:16:14	89.41	1	9
2008-10-21	08:31:14	81.76	1	9
2008-10-21	08:46:14	59.41	1	9
2008-10-21	09:01:14	57.65	1	9
2008-10-21	09:16:14	48.82	1	9
2008-10-21	09:31:14	38.24	1	9
2008-10-21	09:46:14	40	1	9
2008-10-21	10:01:14	33.53	1	9
2008-10-21	10:16:14	30.59	1	9
2008-10-21	10:31:14	26.47	1	9
2008-10-21	10:46:14	24.12	1	9
2008-10-21	11:01:14	21.18	1	9
2008-10-21	11:16:14	21.18	1	9
2008-10-21	11:31:14	100	1	9
2008-10-21	11:46:14	100	1	9
2008-10-21	12:01:14	100	1	9
2008-10-21	12:16:14	100	1	9
2008-10-21	12:31:14	44.12	1	9
2008-10-21	12:46:14	27.65	1	9
2008-10-21	13:01:14	10	1	9
2008-10-21	13:16:14	7.65	1	9
2008-10-21	13:31:14	7.06	1	9
2008-10-21	13:46:14	7.06	1	9
2008-10-21	14:01:14	5.29	1	9
2008-10-21	14:16:14	5.29	1	9
2008-10-21	14:31:14	4.71	1	9
2008-10-21	14:46:14	4.71	1	9
2008-10-21	15:01:14	4.71	1	9
2008-10-21	15:16:14	4.71	1	9
2008-10-21	15:31:14	4.71	1	9
2008-10-21	15:46:14	4.71	1	9
2008-10-21	16:01:14	4.12	1	9
2008-10-21	16:16:14	4.71	1	9
2008-10-21	16:31:14	4.12	1	9
2008-10-21	16:46:14	4.12	1	9
2008-10-21	17:01:14	4.71	1	9
2008-10-21	17:16:14	5.29	1	9
2008-10-21	17:31:14	4.12	1	9
2008-10-21	17:46:14	4.12	1	9
2008-10-21	18:01:14	5.29	1	9
2008-10-21	18:16:14	5.88	1	9
2008-10-21	18:31:14	7.65	1	9
2008-10-21	18:46:14	10.59	1	9
2008-10-21	19:01:14	14.12	1	9
2008-10-21	19:16:14	76.47	1	9
2008-10-21	19:31:14	81.18	1	9
2008-10-21	19:46:14	82.35	1	9
2008-10-21	20:01:14	85.29	1	9
2008-10-21	20:16:14	100	1	9
2008-10-21	20:31:14	100	1	9
2008-10-21	20:46:14	98.24	1	9
2008-10-21	21:01:14	100	1	9
2008-10-21	21:16:14	98.82	1	9
2008-10-21	21:31:14	100	1	9
2008-10-21	21:46:14	99.41	1	9
2008-10-21	22:01:14	93.53	1	9
2008-10-21	22:16:14	88.24	1	9
2008-10-21	22:31:14	85.88	1	9
2008-10-21	22:46:14	84.12	1	9
2008-10-21	23:01:14	66.47	1	9
2008-10-21	23:16:14	61.18	1	9
2008-10-21	23:31:14	60.59	1	9
2008-10-21	23:46:14	62.94	1	9
2008-10-22	00:01:14	78.24	1	9
2008-10-22	00:16:14	75.29	1	9
2008-10-22	00:31:14	72.35	1	9
2008-10-22	00:46:14	75.29	1	9
2008-10-22	01:01:14	78.82	1	9
2008-10-22	01:16:14	78.24	1	9
2008-10-22	01:31:14	72.94	1	9
2008-10-22	01:46:14	64.71	1	9
2008-10-22	02:01:14	71.76	1	9
2008-10-22	02:16:14	70.59	1	9
2008-10-22	02:31:14	70	1	9
2008-10-22	02:46:14	85.88	1	9
2008-10-22	03:01:14	100	1	9
2008-10-22	03:16:14	100	1	9
2008-10-22	03:31:14	100	1	9
2008-10-22	03:46:14	98.82	1	9
2008-10-22	04:01:14	88.82	1	9
2008-10-22	04:16:14	80	1	9
2008-10-22	04:31:14	100	1	9
2008-10-22	04:46:14	100	1	9
2008-10-22	05:01:14	88.24	1	9
2008-10-22	05:16:14	77.65	1	9
2008-10-22	05:31:14	83.53	1	9
2008-10-22	05:46:14	100	1	9
2008-10-22	06:01:14	100	1	9
2008-10-22	06:16:14	95.88	1	9
2008-10-22	06:31:14	98.24	1	9
2008-10-22	06:46:14	90	1	9
2008-10-22	07:01:14	78.82	1	9
2008-10-22	07:16:14	74.71	1	9
2008-10-22	07:31:14	74.12	1	9
2008-10-22	07:46:14	71.76	1	9
2008-10-22	07:31:14	74.12	1	10
2008-10-22	07:46:14	71.76	1	10
2008-10-22	08:01:14	34.12	1	10
2008-10-22	08:16:14	31.18	1	10
2008-10-22	08:31:14	20.59	1	10
2008-10-22	08:46:14	14.71	1	10
2008-10-22	09:01:14	14.12	1	10
2008-10-22	09:16:14	12.94	1	10
2008-10-22	09:31:14	9.41	1	10
2008-10-22	09:46:14	8.24	1	10
2008-10-22	10:01:14	6.47	1	10
2008-10-22	10:16:14	5.88	1	10
2008-10-22	10:31:14	5.88	1	10
2008-10-22	10:46:14	5.29	1	10
2008-10-22	11:01:14	5.29	1	10
2008-10-22	11:16:14	5.29	1	10
2008-10-22	11:31:14	5.29	1	10
2008-10-22	11:46:14	5.29	1	10
2008-10-22	12:01:14	5.29	1	10
2008-10-22	12:16:14	5.29	1	10
2008-10-22	12:31:14	4.71	1	10
2008-10-22	12:46:14	4.71	1	10
2008-10-22	13:01:14	5.29	1	10
2008-10-22	13:16:14	4.71	1	10
2008-10-22	13:31:14	4.71	1	10
2008-10-22	13:46:14	5.29	1	10
2008-10-22	14:01:14	4.12	1	10
2008-10-22	14:16:14	4.12	1	10
2008-10-22	14:31:14	4.12	1	10
2008-10-22	14:46:14	4.12	1	10
2008-10-22	15:01:14	4.12	1	10
2008-10-22	15:16:14	4.12	1	10
2008-10-22	15:31:14	4.12	1	10
2008-10-22	15:46:14	4.12	1	10
2008-10-22	16:01:14	4.12	1	10
2008-10-22	16:16:14	4.12	1	10
2008-10-22	16:31:14	4.12	1	10
2008-10-22	16:46:14	4.12	1	10
2008-10-22	17:01:14	4.12	1	10
2008-10-22	17:16:14	3.53	1	10
2008-10-22	17:31:14	3.53	1	10
2008-10-22	17:46:14	3.53	1	10
2008-10-22	18:01:14	3.53	1	10
2008-10-22	18:16:14	4.12	1	10
2008-10-22	18:31:14	5.29	1	10
2008-10-22	18:46:14	6.47	1	10
2008-10-22	19:01:14	9.41	1	10
2008-10-22	19:16:14	21.76	1	10
2008-10-22	19:31:14	72.94	1	10
2008-10-22	19:46:14	91.18	1	10
2008-10-22	20:01:14	75.29	1	10
2008-10-22	20:16:14	86.47	1	10
2008-10-22	20:31:14	71.76	1	10
2008-10-22	20:46:14	81.76	1	10
2008-10-22	21:01:14	80.59	1	10
2008-10-22	21:16:14	97.65	1	10
2008-10-22	21:31:14	99.41	1	10
2008-10-22	21:46:14	99.41	1	10
2008-10-22	22:01:14	98.24	1	10
2008-10-22	22:16:14	98.24	1	10
2008-10-22	22:31:14	99.41	1	10
2008-10-22	22:46:14	100	1	10
2008-10-22	23:01:14	100	1	10
2008-10-22	23:16:14	100	1	10
2008-10-22	23:31:14	100	1	10
2008-10-22	23:46:14	100	1	10
2008-10-23	00:01:14	100	1	10
2008-10-23	00:16:14	100	1	10
2008-10-23	00:31:14	100	1	10
2008-10-23	00:46:14	100	1	10
2008-10-23	01:01:14	100	1	10
2008-10-23	01:16:14	100	1	10
2008-10-23	01:31:14	100	1	10
2008-10-23	01:46:14	100	1	10
2008-10-23	02:01:14	100	1	10
2008-10-23	02:16:14	100	1	10
2008-10-23	02:31:14	100	1	10
2008-10-23	02:46:14	100	1	10
2008-10-23	03:01:14	100	1	10
2008-10-23	03:16:14	100	1	10
2008-10-23	03:31:14	100	1	10
2008-10-23	03:46:14	100	1	10
2008-10-23	04:01:14	100	1	10
2008-10-23	04:16:14	100	1	10
2008-10-23	04:31:14	100	1	10
2008-10-23	04:46:14	100	1	10
2008-10-23	05:01:14	100	1	10
2008-10-23	05:16:14	100	1	10
2008-10-23	05:31:14	100	1	10
2008-10-23	05:46:14	100	1	10
2008-10-23	06:01:14	100	1	10
2008-10-23	06:16:14	91.76	1	10
2008-10-23	06:31:14	92.35	1	10
2008-10-23	06:46:14	99.41	1	10
2008-10-23	07:01:14	91.76	1	10
2008-10-23	07:16:14	87.06	1	10
2008-10-23	08:01:14	68.82	1	11
2008-10-23	08:16:14	62.94	1	11
2008-10-23	08:31:14	51.76	1	11
2008-10-23	08:46:14	32.94	1	11
2008-10-23	09:01:14	24.71	1	11
2008-10-23	09:16:14	17.06	1	11
2008-10-23	09:31:14	13.53	1	11
2008-10-23	09:46:14	10	1	11
2008-10-23	10:01:14	7.06	1	11
2008-10-23	10:16:14	7.06	1	11
2008-10-23	10:31:14	5.88	1	11
2008-10-23	10:46:14	5.88	1	11
2008-10-23	11:01:14	5.29	1	11
2008-10-23	11:16:14	5.29	1	11
2008-10-23	11:31:14	4.71	1	11
2008-10-23	11:46:14	5.29	1	11
2008-10-23	12:01:14	5.29	1	11
2008-10-23	12:16:14	4.71	1	11
2008-10-23	12:31:14	4.71	1	11
2008-10-23	12:46:14	5.29	1	11
2008-10-23	13:01:14	5.29	1	11
2008-10-23	13:16:14	5.29	1	11
2008-10-23	13:31:14	4.71	1	11
2008-10-23	13:46:14	4.71	1	11
2008-10-23	14:01:14	4.71	1	11
2008-10-23	14:16:14	4.12	1	11
2008-10-23	14:31:14	4.12	1	11
2008-10-23	14:46:14	4.71	1	11
2008-10-23	15:01:14	4.71	1	11
2008-10-23	15:16:14	4.71	1	11
2008-10-23	15:31:14	4.71	1	11
2008-10-23	15:46:14	4.71	1	11
2008-10-23	16:01:14	4.71	1	11
2008-10-23	16:16:14	4.12	1	11
2008-10-23	16:31:14	4.12	1	11
2008-10-23	16:46:14	4.12	1	11
2008-10-23	17:01:14	4.12	1	11
[truncated: 155 more rows]

## Sheet: LeafWetnessByTrial
date	Time	wet(%)	trial
2008-07-25	12:31:49	4.12	0
2008-07-25	12:46:49	4.12	0
2008-07-25	13:01:49	4.71	0
2008-07-25	13:16:49	4.71	0
2008-07-25	13:31:49	4.12	0
2008-07-25	13:46:49	4.71	0
2008-07-25	14:01:49	4.12	0
2008-07-25	14:16:49	4.12	0
2008-07-25	14:31:49	4.71	0
2008-07-25	14:46:49	4.71	0
2008-07-25	15:01:49	4.12	0
2008-07-25	15:16:49	4.12	0
2008-07-25	15:31:49	4.12	0
2008-07-25	15:46:49	4.12	0
2008-07-25	16:01:49	4.12	0
2008-07-25	16:16:49	3.53	0
2008-07-25	16:31:49	3.53	0
2008-07-25	16:46:49	4.12	0
2008-07-25	17:01:49	4.12	0
2008-07-25	17:16:49	4.12	0
2008-07-25	17:31:49	3.53	0
2008-07-25	17:46:49	3.53	0
2008-07-25	18:01:49	4.12	0
2008-07-25	18:16:49	3.53	0
2008-07-25	18:31:49	3.53	0
2008-07-25	18:46:49	4.12	0
2008-07-25	19:01:49	3.53	0
2008-07-25	19:16:49	3.53	0
2008-07-25	19:31:49	3.53	0
2008-07-25	19:46:49	3.53	0
2008-07-25	20:01:49	3.53	0
2008-07-25	20:16:49	3.53	0
2008-07-25	20:31:49	8.82	0
2008-07-25	20:46:49	24.71	0
2008-07-25	21:01:49	38.24	0
2008-07-25	21:16:49	40	0
2008-07-25	21:31:49	44.71	0
2008-07-25	21:46:49	52.35	0
2008-07-25	22:01:49	49.41	0
2008-07-25	22:16:49	62.94	0
2008-07-25	22:31:49	68.24	0
2008-07-25	22:46:49	58.24	0
2008-07-25	23:01:49	47.06	0
2008-07-25	23:16:49	37.06	0
2008-07-25	23:31:49	32.35	0
2008-07-25	23:46:49	30.59	0
2008-07-26	00:01:49	30	0
2008-07-26	00:16:49	30.59	0
2008-07-26	00:31:49	29.41	0
2008-07-26	00:46:49	28.24	0
2008-07-26	01:01:49	28.24	0
2008-07-26	01:16:49	28.24	0
2008-07-26	01:31:49	28.82	0
2008-07-26	01:46:49	29.41	0
2008-07-26	02:01:49	29.41	0
2008-07-26	02:16:49	28.82	0
2008-07-26	02:31:49	29.41	0
2008-07-26	02:46:49	31.18	0
2008-07-26	03:01:49	31.18	0
2008-07-26	03:16:49	31.76	0
2008-07-26	03:31:49	32.35	0
2008-07-26	03:46:49	32.94	0
2008-07-26	04:01:49	35.88	0
2008-07-26	04:16:49	34.12	0
2008-07-26	04:31:49	37.65	0
2008-07-26	04:46:49	35.88	0
2008-07-26	05:01:49	39.41	0
2008-07-26	05:16:49	41.18	0
2008-07-26	05:31:49	42.94	0
2008-07-26	05:46:49	42.94	0
2008-07-26	06:01:49	46.47	0
2008-07-26	06:16:49	46.47	0
2008-07-26	06:31:49	47.06	0
2008-07-26	06:46:49	48.82	0
2008-07-26	07:01:49	46.47	0
2008-07-26	07:16:49	44.71	0
2008-07-26	07:31:49	40.59	0
2008-07-26	07:46:49	37.06	0
2008-07-26	08:01:49	34.12	0
2008-07-26	08:16:49	27.65	0
2008-07-26	08:31:49	100	0
2008-07-26	08:46:49	100	0
2008-07-26	09:01:49	100	0
2008-07-26	09:16:49	100	0
2008-07-26	09:31:49	100	0
2008-07-26	09:46:49	100	0
2008-07-26	10:01:49	100	0
2008-07-26	10:16:49	100	0
2008-07-26	10:31:49	100	0
2008-07-26	10:46:49	100	0
2008-07-26	11:01:49	100	0
2008-07-26	11:16:49	100	0
2008-07-26	11:31:49	100	0
2008-07-26	11:46:49	100	0
2008-07-26	12:01:49	40	0
2008-07-26	12:16:49	10.59	0
2008-07-26	12:31:49	7.06	0
2008-07-26	12:46:49	5.88	0
2008-07-26	13:01:49	5.29	0
2008-07-26	13:16:49	5.29	0
2008-07-26	13:31:49	5.29	0
2008-07-26	13:46:49	4.71	0
2008-07-26	14:01:49	4.71	0
2008-07-26	14:16:49	4.71	0
2008-07-26	14:31:49	5.29	0
2008-07-26	14:46:49	4.71	0
2008-07-26	15:01:49	4.71	0
2008-07-26	15:16:49	4.71	0
2008-07-26	15:31:49	4.71	0
2008-07-26	15:46:49	4.71	0
2008-07-26	16:01:49	4.12	0
2008-07-26	16:16:49	4.71	0
2008-07-26	16:31:49	4.71	0
2008-07-26	16:46:49	4.12	0
2008-07-26	17:01:49	4.71	0
2008-07-26	17:16:49	4.71	0
2008-07-26	17:31:49	4.12	0
2008-07-26	17:46:49	4.12	0
2008-07-26	18:01:49	4.71	0
2008-07-26	18:16:49	4.12	0
2008-07-26	18:31:49	4.12	0
2008-07-26	18:46:49	4.12	0
2008-07-26	19:01:49	4.12	0
2008-07-26	19:16:49	4.71	0
2008-07-26	19:31:49	4.71	0
2008-07-26	19:46:49	7.06	0
2008-07-26	20:01:49	7.65	0
2008-07-26	20:16:49	8.82	0
2008-07-26	20:31:49	8.82	0
2008-07-26	20:46:49	9.41	0
2008-07-26	21:01:49	10.59	0
2008-07-26	21:16:49	12.35	0
2008-07-26	21:31:49	18.82	0
2008-07-26	21:46:49	27.06	0
2008-07-26	22:01:49	27.06	0
2008-07-26	22:16:49	38.24	0
2008-07-26	22:31:49	62.94	0
2008-07-26	22:46:49	67.06	0
2008-07-26	23:01:49	70.59	0
2008-07-26	23:16:49	84.12	0
2008-07-26	23:31:49	90	0
2008-07-26	23:46:49	81.76	0
2008-07-27	00:01:49	84.12	0
2008-07-27	00:16:49	88.82	0
2008-07-27	00:31:49	83.53	0
2008-07-27	00:46:49	85.88	0
2008-07-27	01:01:49	85.29	0
2008-07-27	01:16:49	84.12	0
2008-07-27	01:31:49	84.71	0
2008-07-27	01:46:49	98.24	0
2008-07-27	02:01:49	88.24	0
2008-07-27	02:16:49	95.29	0
2008-07-27	02:31:49	100	0
2008-07-27	02:46:49	100	0
2008-07-27	03:01:49	92.94	0
2008-07-27	03:16:49	88.82	0
2008-07-27	03:31:49	87.65	0
2008-07-27	03:46:49	91.18	0
2008-07-27	04:01:49	82.94	0
2008-07-27	04:16:49	82.35	0
2008-07-27	04:31:49	88.24	0
2008-07-27	04:46:49	93.53	0
2008-07-27	05:01:49	98.82	0
2008-07-27	05:16:49	89.41	0
2008-07-27	05:31:49	84.12	0
2008-07-27	05:46:49	88.82	0
2008-07-27	06:01:49	88.24	0
2008-07-27	06:16:49	87.65	0
2008-07-27	06:31:49	84.71	0
2008-07-27	06:46:49	79.41	0
2008-07-27	07:01:49	78.82	0
2008-07-27	07:16:49	73.53	0
2008-07-27	07:31:49	71.18	0
2008-07-27	07:46:49	54.12	0
2008-07-27	08:01:49	35.29	0
2008-07-27	08:16:49	30	0
2008-07-27	08:31:49	20	0
2008-07-27	08:46:49	12.94	0
2008-07-27	09:01:49	11.18	0
2008-07-27	09:16:49	10	0
2008-07-27	09:31:49	8.24	0
2008-07-27	09:46:49	6.47	0
2008-07-27	10:01:49	6.47	0
2008-07-27	10:16:49	5.88	0
2008-07-27	10:31:49	5.29	0
2008-07-27	10:46:49	4.71	0
2008-07-27	11:01:49	5.29	0
2008-07-27	11:16:49	4.71	0
2008-07-27	11:31:49	4.71	0
2008-07-27	11:46:49	5.29	0
2008-07-27	12:01:49	4.71	0
2008-07-27	12:16:49	4.71	0
2008-07-27	12:31:49	4.71	0
2008-07-27	12:46:49	4.71	0
2008-07-27	13:01:49	4.71	0
2008-07-27	13:16:49	4.71	0
2008-07-27	13:31:49	5.29	0
2008-07-27	13:46:49	4.71	0
2008-07-27	14:01:49	4.71	0
2008-07-27	14:16:49	4.71	0
2008-07-27	14:31:49	4.12	0
2008-07-27	14:46:49	4.71	0
2008-07-27	15:01:49	4.71	0
2008-07-27	15:16:49	4.71	0
2008-07-27	15:31:49	4.71	0
2008-07-27	15:46:49	4.71	0
2008-07-27	16:01:49	4.71	0
2008-07-27	16:16:49	4.12	0
2008-07-27	16:31:49	4.12	0
2008-07-27	16:46:49	4.12	0
2008-07-27	17:01:49	4.12	0
2008-07-27	17:16:49	4.12	0
2008-07-27	17:31:49	4.12	0
2008-07-27	17:46:49	4.71	0
2008-07-27	18:01:49	4.12	0
2008-07-27	18:16:49	4.12	0
2008-07-27	18:31:49	4.12	0
2008-07-27	18:46:49	4.71	0
2008-07-27	19:01:49	4.71	0
2008-07-27	19:16:49	4.12	0
2008-07-27	19:31:49	4.71	0
2008-07-27	19:46:49	8.24	0
2008-07-27	20:01:49	10	0
2008-07-27	20:16:49	13.53	0
2008-07-27	20:31:49	15.88	0
2008-07-27	20:46:49	18.82	0
2008-07-27	21:01:49	21.18	0
2008-07-27	21:16:49	23.53	0
2008-07-27	21:31:49	25.88	0
2008-07-27	21:46:49	25.88	0
2008-07-27	22:01:49	28.24	0
2008-07-27	22:16:49	30.59	0
2008-07-27	22:31:49	32.35	0
2008-07-27	22:46:49	35.88	0
2008-07-27	23:01:49	41.18	0
2008-07-27	23:16:49	42.35	0
2008-07-27	23:31:49	43.53	0
2008-07-27	23:46:49	46.47	0
2008-07-28	00:01:49	50	0
2008-07-28	00:16:49	54.71	0
2008-07-28	00:31:49	54.71	0
2008-07-28	00:46:49	53.53	0
2008-07-28	01:01:49	54.12	0
2008-07-28	01:16:49	55.29	0
2008-07-28	01:31:49	55.88	0
2008-07-28	01:46:49	56.47	0
2008-07-28	02:01:49	58.24	0
2008-07-28	02:16:49	67.65	0
2008-07-28	02:31:49	73.53	0
2008-07-28	02:46:49	79.41	0
2008-07-28	03:01:49	82.35	0
2008-07-28	03:16:49	91.18	0
2008-07-28	03:31:49	92.94	0
2008-07-28	03:46:49	84.12	0
2008-07-28	04:01:49	80	0
2008-07-28	04:16:49	92.94	0
2008-07-28	04:31:49	90	0
2008-07-28	04:46:49	100	0
2008-07-28	05:01:49	96.47	0
2008-07-28	05:16:49	91.76	0
2008-07-28	05:31:49	85.88	0
2008-07-28	05:46:49	87.06	0
2008-07-28	06:01:49	80	0
2008-07-28	06:16:49	80	0
2008-07-28	06:31:49	91.76	0
2008-07-28	06:46:49	88.82	0
2008-07-28	07:01:49	96.47	0
2008-07-28	07:16:49	100	0
2008-07-28	07:31:49	100	0
2008-07-28	07:46:49	100	0
2008-07-28	08:01:49	100	0
2008-07-28	08:16:49	79.41	0
2008-07-28	08:31:49	75.29	0
2008-07-28	08:46:49	62.94	0
2008-07-28	09:01:49	38.82	0
2008-07-28	09:16:49	26.47	0
2008-07-28	09:31:49	19.41	0
2008-07-28	09:46:49	15.29	0
2008-07-28	10:01:49	12.94	0
2008-07-28	10:16:49	11.76	0
2008-07-28	10:31:49	9.41	0
2008-07-28	10:46:49	7.65	0
2008-07-28	11:01:49	6.47	0
2008-07-28	11:16:49	5.88	0
2008-07-28	11:31:49	5.29	0
2008-07-28	11:46:49	5.29	0
2008-07-28	12:01:49	4.71	0
2008-07-28	12:16:49	5.29	0
2008-07-28	12:31:49	4.71	0
2008-07-28	12:46:49	5.29	0
2008-07-28	13:01:49	5.29	0
2008-07-28	13:16:49	4.71	0
2008-07-28	13:31:49	4.71	0
2008-07-28	13:46:49	4.71	0
2008-07-28	14:01:49	5.29	0
2008-07-28	14:16:49	4.71	0
2008-07-28	14:31:49	5.29	0
2008-07-28	14:46:49	4.71	0
2008-07-28	15:01:49	4.71	0
2008-07-28	15:16:49	4.71	0
2008-07-28	15:31:49	5.29	0
2008-07-28	15:46:49	4.71	0
2008-07-28	16:01:49	4.71	0
2008-07-28	16:16:49	4.71	0
2008-07-28	16:31:49	4.71	0
2008-07-28	16:46:49	4.12	0
2008-07-28	17:01:49	4.71	0
2008-07-28	17:16:49	4.71	0
2008-07-28	17:31:49	4.71	0
2008-07-28	17:46:49	4.71	0
2008-07-28	18:01:49	4.71	0
2008-07-28	18:16:49	4.71	0
2008-07-28	18:31:49	4.71	0
2008-07-28	18:46:49	6.47	0
2008-07-28	19:01:49	8.82	0
2008-07-28	19:16:49	10	0
2008-07-28	19:31:49	13.53	0
2008-07-28	19:46:49	15.29	0
2008-07-28	20:01:49	21.18	0
2008-07-28	20:16:49	27.65	0
2008-07-28	20:31:49	34.71	0
2008-07-28	20:46:49	54.71	0
2008-07-28	21:01:49	69.41	0
2008-07-28	21:16:49	87.65	0
2008-07-28	21:31:49	87.65	0
2008-07-28	21:46:49	87.06	0
2008-07-28	22:01:49	88.24	0
2008-07-28	22:16:49	88.82	0
2008-07-28	22:31:49	92.35	0
2008-07-28	22:46:49	89.41	0
2008-07-28	23:01:49	89.41	0
2008-07-28	23:16:49	90.59	0
2008-07-28	23:31:49	92.35	0
2008-07-28	23:46:49	91.76	0
2008-07-29	00:01:49	92.35	0
2008-07-29	00:16:49	91.18	0
2008-07-29	00:31:49	91.18	0
2008-07-29	00:46:49	92.35	0
2008-07-29	01:01:49	94.12	0
2008-07-29	01:16:49	94.71	0
2008-07-29	01:31:49	94.71	0
2008-07-29	01:46:49	96.47	0
2008-07-29	02:01:49	95.88	0
2008-07-29	02:16:49	96.47	0
2008-07-29	02:31:49	99.41	0
2008-07-29	02:46:49	96.47	0
2008-07-29	03:01:49	96.47	0
2008-07-29	03:16:49	96.47	0
2008-07-29	03:31:49	98.24	0
2008-07-29	03:46:49	100	0
2008-07-29	04:01:49	100	0
2008-07-29	04:16:49	100	0
2008-07-29	04:31:49	100	0
2008-07-29	04:46:49	100	0
2008-07-29	05:01:49	100	0
2008-07-29	05:16:49	100	0
2008-07-29	05:31:49	100	0
2008-07-29	05:46:49	100	0
2008-07-29	06:01:49	100	0
2008-07-29	06:16:49	100	0
2008-07-29	06:31:49	100	0
2008-07-29	06:46:49	100	0
2008-07-29	07:01:49	100	0
2008-07-29	07:16:49	100	0
2008-07-29	07:31:49	100	0
2008-07-29	07:46:49	100	0
2008-07-29	08:01:49	98.82	0
2008-07-29	08:16:49	92.35	0
2008-07-29	08:31:49	88.82	0
2008-07-29	08:46:49	56.47	0
2008-07-29	09:01:49	40	0
2008-07-29	09:16:49	22.94	0
2008-07-29	09:31:49	9.41	0
2008-07-29	09:46:49	5.88	0
2008-07-29	10:01:49	5.29	0
2008-07-29	10:16:49	5.29	0
2008-07-29	10:31:49	5.88	0
2008-07-29	10:46:49	5.29	0
2008-07-29	11:01:49	5.88	0
2008-07-29	11:16:49	5.29	0
2008-07-29	11:31:49	5.29	0
2008-07-29	11:46:49	5.29	0
2008-07-29	12:01:49	5.29	0
2008-07-29	12:16:49	5.29	0
2008-07-29	12:31:49	5.29	0
2008-07-29	12:46:49	5.29	0
2008-07-29	13:01:49	5.29	0
2008-07-29	13:16:49	5.29	0
2008-07-29	13:31:49	5.29	0
2008-07-29	13:46:49	5.29	0
2008-07-29	14:01:49	5.29	0
2008-07-29	14:16:49	4.71	0
2008-07-29	14:31:49	4.71	0
2008-07-29	14:46:49	4.71	0
2008-07-29	15:01:49	4.71	0
2008-07-29	15:16:49	4.71	0
2008-07-29	15:31:49	4.71	0
2008-07-29	15:46:49	4.71	0
2008-07-29	16:01:49	4.71	0
2008-07-29	16:16:49	4.71	0
2008-07-29	16:31:49	4.12	0
2008-07-29	16:46:49	4.12	0
2008-07-29	17:01:49	4.12	0
2008-07-29	17:16:49	4.12	0
2008-07-29	17:31:49	4.71	0
2008-07-29	17:46:49	4.71	0
2008-07-29	18:01:49	4.12	0
2008-07-29	18:16:49	3.53	0
2008-07-29	18:31:49	4.12	0
2008-07-29	18:46:49	4.12	0
2008-07-29	19:01:49	4.12	0
2008-07-29	19:16:49	3.53	0
2008-07-29	19:31:49	3.53	0
2008-07-29	19:46:49	4.12	0
2008-07-29	20:01:49	4.12	0
2008-07-29	20:16:49	4.71	0
2008-07-29	20:31:49	10	0
2008-07-29	20:46:49	29.41	0
2008-07-29	21:01:49	68.82	0
2008-07-29	21:16:49	80	0
2008-07-29	21:31:49	85.29	0
2008-07-29	21:46:49	91.76	0
2008-07-29	22:01:49	96.47	0
2008-07-29	22:16:49	100	0
2008-07-29	22:31:49	100	0
2008-07-29	22:46:49	100	0
2008-07-29	23:01:49	100	0
2008-07-29	23:16:49	100	0
2008-07-29	23:31:49	100	0
2008-07-29	23:46:49	100	0
2008-07-30	00:01:49	100	0
2008-07-30	00:16:49	100	0
2008-07-30	00:31:49	100	0
2008-07-30	00:46:49	100	0
2008-07-30	01:01:49	100	0
2008-07-30	01:16:49	100	0
2008-07-30	01:31:49	100	0
2008-07-30	01:46:49	100	0
2008-07-30	02:01:49	100	0
2008-07-30	02:16:49	100	0
2008-07-30	02:31:49	100	0
2008-07-30	02:46:49	100	0
2008-07-30	03:01:49	100	0
2008-07-30	03:16:49	100	0
2008-07-30	03:31:49	100	0
2008-07-30	03:46:49	100	0
2008-07-30	04:01:49	100	0
2008-07-30	04:16:49	100	0
2008-07-30	04:31:49	100	0
2008-07-30	04:46:49	100	0
2008-07-30	05:01:49	100	0
2008-07-30	05:16:49	100	0
2008-07-30	05:31:49	100	0
2008-07-30	05:46:49	100	0
2008-07-30	06:01:49	100	0
2008-07-30	06:16:49	100	0
2008-07-30	06:31:49	100	0
2008-07-30	06:46:49	100	0
2008-07-30	07:01:49	100	0
2008-07-30	07:16:49	100	0
2008-07-30	07:31:49	98.82	0
2008-07-30	07:46:49	90.59	0
2008-07-30	08:01:49	82.94	0
2008-07-30	08:16:49	69.41	0
2008-07-30	08:31:49	51.18	0
2008-07-30	08:46:49	31.18	0
2008-07-30	09:01:49	18.82	0
2008-07-30	09:16:49	11.76	0
2008-07-30	09:31:49	9.41	0
2008-07-30	09:46:49	7.06	0
2008-07-30	10:01:49	5.88	0
2008-07-30	10:16:49	5.29	0
2008-07-30	10:31:49	5.29	0
2008-07-30	10:46:49	5.29	0
2008-07-30	11:01:49	4.71	0
2008-07-30	11:16:49	5.29	0
2008-07-30	11:31:49	5.29	0
2008-07-30	11:46:49	4.71	0
2008-07-30	12:01:49	4.71	0
2008-07-30	12:16:49	5.29	0
2008-07-30	12:31:49	5.88	0
2008-07-30	12:46:49	5.29	0
2008-07-30	13:01:49	4.71	0
2008-07-30	13:16:49	4.71	0
2008-07-30	13:31:49	4.71	0
2008-07-30	13:46:49	5.29	0
2008-07-30	14:01:49	4.71	0
2008-07-30	14:16:49	4.71	0
2008-07-30	14:31:49	4.71	0
2008-07-30	14:46:49	4.71	0
2008-07-30	15:01:49	4.71	0
2008-07-30	15:16:49	4.71	0
2008-07-30	15:31:49	4.71	0
2008-07-30	15:46:49	5.29	0
2008-07-30	16:01:49	4.71	0
2008-07-30	16:16:49	4.12	0
2008-07-30	16:31:49	4.71	0
2008-07-30	16:46:49	4.12	0
2008-07-30	17:01:49	4.12	0
2008-07-30	17:16:49	4.12	0
2008-07-30	17:31:49	4.12	0
2008-07-30	17:46:49	4.12	0
2008-07-30	18:01:49	4.12	0
2008-07-30	18:16:49	4.12	0
2008-07-30	18:31:49	4.12	0
2008-07-30	18:46:49	4.12	0
2008-07-30	19:01:49	4.12	0
2008-07-30	19:16:49	4.12	0
2008-07-30	19:31:49	4.12	0
2008-07-30	19:46:49	4.71	0
2008-07-30	20:01:49	7.65	0
2008-07-30	20:16:49	18.24	0
2008-07-30	20:31:49	64.71	0
2008-07-30	20:46:49	63.53	0
2008-07-30	21:01:49	65.88	0
2008-07-30	21:16:49	58.24	0
2008-07-30	21:31:49	62.35	0
2008-07-30	21:46:49	71.18	0
2008-07-30	22:01:49	71.76	0
2008-07-30	22:16:49	76.47	0
2008-07-30	22:31:49	92.35	0
2008-07-30	22:46:49	91.76	0
2008-07-30	23:01:49	82.35	0
2008-07-30	23:16:49	82.35	0
2008-07-30	23:31:49	81.76	0
2008-07-30	23:46:49	81.18	0
2008-07-31	00:01:49	80.59	0
2008-07-31	00:16:49	80.59	0
2008-07-31	00:31:49	78.24	0
2008-07-31	00:46:49	80	0
2008-07-31	01:01:49	82.35	0
2008-07-31	01:16:49	78.82	0
2008-07-31	01:31:49	81.18	0
2008-07-31	01:46:49	77.06	0
2008-07-31	02:01:49	82.35	0
2008-07-31	02:16:49	77.65	0
2008-07-31	02:31:49	74.12	0
2008-07-31	02:46:49	82.35	0
2008-07-31	03:01:49	91.76	0
2008-07-31	03:16:49	84.71	0
2008-07-31	03:31:49	82.35	0
2008-07-31	03:46:49	90.59	0
2008-07-31	04:01:49	85.29	0
2008-07-31	04:16:49	88.82	0
2008-07-31	04:31:49	88.24	0
2008-07-31	04:46:49	88.82	0
2008-07-31	05:01:49	87.65	0
2008-07-31	05:16:49	84.71	0
2008-07-31	05:31:49	87.65	0
2008-07-31	05:46:49	85.88	0
2008-07-31	06:01:49	88.82	0
2008-07-31	06:16:49	88.24	0
2008-07-31	06:31:49	88.82	0
2008-07-31	06:46:49	87.65	0
2008-07-31	07:01:49	85.88	0
2008-07-31	07:16:49	83.53	0
2008-07-31	07:31:49	81.18	0
2008-07-31	07:46:49	73.53	0
2008-07-31	08:01:49	64.71	0
2008-07-31	08:16:49	56.47	0
2008-07-31	08:31:49	42.94	0
2008-07-31	08:46:49	37.65	0
2008-07-31	09:01:49	100	0
2008-07-31	09:16:49	100	0
2008-07-31	09:31:49	100	0
2008-07-31	09:46:49	54.71	0
2008-07-31	10:01:49	24.12	0
2008-07-31	10:16:49	14.71	0
2008-07-31	10:31:49	81.76	0
2008-07-31	10:46:49	11.76	0
2008-07-31	11:01:49	7.65	0
2008-07-31	11:16:49	7.65	0
2008-07-31	11:31:49	6.47	0
2008-07-31	11:46:49	5.88	0
2008-07-31	12:01:49	5.29	0
2008-07-31	12:16:49	5.29	0
2008-07-31	12:31:49	5.88	0
2008-07-31	12:46:49	5.29	0
2008-07-31	13:01:49	5.29	0
2008-07-31	13:16:49	5.29	0
2008-07-31	13:31:49	5.88	0
2008-07-31	13:46:49	5.88	0
2008-07-31	14:01:49	5.29	0
2008-07-31	14:16:49	5.29	0
2008-07-31	14:31:49	5.29	0
2008-07-31	14:46:49	5.29	0
2008-07-31	15:01:49	5.29	0
2008-07-31	15:16:49	4.71	0
2008-07-31	15:31:49	4.71	0
2008-07-31	15:46:49	4.71	0
2008-07-31	16:01:49	4.71	0
2008-07-31	16:16:49	4.71	0
2008-07-31	16:31:49	5.29	0
2008-07-31	16:46:49	4.71	0
2008-07-31	17:01:49	4.12	0
2008-07-31	17:16:49	4.71	0
2008-07-31	17:31:49	5.29	0
2008-07-31	17:46:49	4.71	0
2008-07-31	18:01:49	5.29	0
2008-07-31	18:16:49	4.71	0
2008-07-31	18:31:49	4.71	0
2008-07-31	18:46:49	6.47	0
2008-07-31	19:01:49	7.06	0
2008-07-31	19:16:49	9.41	0
2008-07-31	19:31:49	11.76	0
2008-07-31	19:46:49	18.24	0
2008-07-31	20:01:49	30.59	0
2008-07-31	20:16:49	41.18	0
2008-07-31	20:31:49	48.82	0
2008-07-31	20:46:49	62.94	0
2008-07-31	21:01:49	68.82	0
2008-07-31	21:16:49	69.41	0
2008-07-31	21:31:49	77.65	0
2008-07-31	21:46:49	81.18	0
2008-07-31	22:01:49	88.24	0
2008-07-31	22:16:49	87.65	0
2008-07-31	22:31:49	87.06	0
2008-07-31	22:46:49	87.06	0
2008-07-31	23:01:49	91.76	0
2008-07-31	23:16:49	90.59	0
2008-07-31	23:31:49	92.35	0
2008-07-31	23:46:49	92.35	0
2008-08-01	00:01:49	94.12	0
2008-08-01	00:16:49	93.53	0
2008-08-01	00:31:49	93.53	0
2008-08-01	00:46:49	92.94	0
2008-08-01	01:01:49	93.53	0
2008-08-01	01:16:49	94.71	0
2008-08-01	01:31:49	95.88	0
2008-08-01	01:46:49	95.88	0
2008-08-01	02:01:49	95.88	0
2008-08-01	02:16:49	100	0
2008-08-01	02:31:49	99.41	0
2008-08-01	02:46:49	100	0
2008-08-01	03:01:49	100	0
2008-08-01	03:16:49	100	0
2008-08-01	03:31:49	100	0
2008-08-01	03:46:49	100	0
2008-08-01	04:01:49	100	0
2008-08-01	04:16:49	100	0
2008-08-01	04:31:49	100	0
2008-08-01	04:46:49	100	0
2008-08-01	05:01:49	100	0
2008-08-01	05:16:49	100	0
2008-08-01	05:31:49	100	0
2008-08-01	05:46:49	100	0
2008-08-01	06:01:49	100	0
2008-08-01	06:16:49	100	0
2008-08-01	06:31:49	100	0
2008-08-01	06:46:49	100	0
2008-08-01	07:01:49	100	0
2008-08-01	07:16:49	100	0
2008-08-01	07:31:49	100	0
2008-08-01	07:46:49	100	0
2008-08-01	08:01:49	93.53	0
2008-08-01	08:16:49	87.06	0
2008-08-01	08:31:49	80	0
2008-08-01	08:46:49	65.29	0
2008-08-01	09:01:49	52.94	0
2008-08-01	09:16:49	32.35	0
2008-08-01	09:31:49	11.76	0
2008-08-01	09:46:49	5.88	0
2008-08-01	10:01:49	5.29	0
2008-08-01	10:16:49	5.29	0
2008-08-01	10:31:49	4.71	0
2008-08-01	10:46:49	5.29	0
2008-08-01	11:01:49	4.71	0
2008-08-01	11:16:49	4.71	0
2008-08-01	11:31:49	5.88	0
2008-08-01	11:46:49	5.29	0
2008-08-01	12:01:49	5.29	0
2008-08-01	12:16:49	5.29	0
2008-08-01	12:31:49	5.29	0
2008-08-01	12:46:49	5.29	0
2008-08-01	13:01:49	5.29	0
2008-08-01	13:16:49	4.71	0
2008-08-01	13:31:49	5.29	0
2008-08-01	13:46:49	4.71	0
2008-08-01	14:01:49	5.29	0
2008-08-01	14:16:49	4.71	0
2008-08-01	14:31:49	5.29	0
2008-08-01	14:46:49	4.71	0
2008-08-01	15:01:49	4.71	0
2008-08-01	15:16:49	4.71	0
2008-08-01	15:31:49	4.71	0
2008-08-01	15:46:49	4.12	0
2008-08-01	16:01:49	4.71	0
2008-08-01	16:16:49	4.71	0
2008-08-01	16:31:49	4.12	0
2008-08-01	16:46:49	4.12	0
2008-08-01	17:01:49	4.12	0
2008-08-01	17:16:49	4.12	0
2008-08-01	17:31:49	4.12	0
2008-08-01	17:46:49	3.53	0
2008-08-01	18:01:49	4.12	0
2008-08-01	18:16:49	4.12	0
2008-08-01	18:31:49	4.12	0
2008-08-01	18:46:49	3.53	0
2008-08-01	19:01:49	4.12	0
2008-08-01	19:16:49	5.29	0
2008-08-01	19:31:49	18.24	0
2008-08-01	19:46:49	40.59	0
2008-08-01	20:01:49	49.41	0
2008-08-01	20:16:49	57.06	0
2008-08-01	20:31:49	60	0
2008-08-01	20:46:49	67.65	0
2008-08-01	21:01:49	73.53	0
2008-08-01	21:16:49	77.65	0
2008-08-01	21:31:49	79.41	0
2008-08-01	21:46:49	87.65	0
2008-08-01	22:01:49	89.41	0
2008-08-01	22:16:49	88.24	0
2008-08-01	22:31:49	88.82	0
2008-08-01	22:46:49	92.35	0
2008-08-01	23:01:49	90	0
2008-08-01	23:16:49	90.59	0
2008-08-01	23:31:49	90.59	0
2008-08-01	23:46:49	92.35	0
2008-08-02	00:01:49	97.65	0
2008-08-02	00:16:49	92.35	0
2008-08-02	00:31:49	94.12	0
2008-08-02	00:46:49	94.71	0
2008-08-02	01:01:49	94.71	0
2008-08-02	01:16:49	92.94	0
2008-08-02	01:31:49	93.53	0
2008-08-02	01:46:49	100	0
2008-08-02	02:01:49	100	0
2008-08-02	02:16:49	100	0
2008-08-02	02:31:49	100	0
2008-08-02	02:46:49	100	0
2008-08-02	03:01:49	100	0
2008-08-02	03:16:49	100	0
2008-08-02	03:31:49	100	0
2008-08-02	03:46:49	100	0
2008-08-02	04:01:49	100	0
2008-08-02	04:16:49	100	0
2008-08-02	04:31:49	100	0
2008-08-02	04:46:49	98.24	0
2008-08-02	05:01:49	97.65	0
2008-08-02	05:16:49	96.47	0
2008-08-02	05:31:49	95.29	0
2008-08-02	05:46:49	96.47	0
2008-08-02	06:01:49	100	0
2008-08-02	06:16:49	100	0
2008-08-02	06:31:49	100	0
2008-08-02	06:46:49	100	0
2008-08-02	07:01:49	100	0
2008-08-02	07:16:49	94.12	0
2008-08-02	07:31:49	92.94	0
2008-08-02	07:46:49	88.24	0
2008-08-02	08:01:49	82.35	0
2008-08-02	08:16:49	65.29	0
2008-08-02	08:31:49	52.94	0
2008-08-02	08:46:49	65.88	0
2008-08-02	09:01:49	41.76	0
2008-08-02	09:16:49	21.18	0
2008-08-02	09:31:49	15.29	0
2008-08-02	09:46:49	12.94	0
2008-08-02	10:01:49	9.41	0
2008-08-02	10:16:49	8.82	0
2008-08-02	10:31:49	7.65	0
2008-08-02	10:46:49	5.29	0
2008-08-02	11:01:49	4.71	0
2008-08-02	11:16:49	5.29	0
2008-08-02	11:31:49	5.29	0
2008-08-02	11:46:49	5.29	0
2008-08-02	12:01:49	4.71	0
2008-08-02	12:16:49	5.29	0
2008-08-02	12:31:49	4.71	0
2008-08-02	12:46:49	5.29	0
2008-08-02	13:01:49	4.71	0
2008-08-02	13:16:49	4.71	0
2008-08-02	13:31:49	4.71	0
2008-08-02	13:46:49	4.71	0
2008-08-02	14:01:49	4.71	0
2008-08-02	14:16:49	4.71	0
2008-08-02	14:31:49	5.29	0
2008-08-02	14:46:49	4.71	0
2008-08-02	15:01:49	4.71	0
2008-08-02	15:16:49	4.71	0
2008-08-02	15:31:49	4.71	0
2008-08-02	15:46:49	4.71	0
2008-08-02	16:01:49	4.12	0
2008-08-02	16:16:49	4.12	0
2008-08-02	16:31:49	4.71	0
2008-08-02	16:46:49	4.12	0
2008-08-02	17:01:49	4.71	0
2008-08-02	17:16:49	4.12	0
2008-08-02	17:31:49	4.12	0
2008-08-02	17:46:49	4.71	0
2008-08-02	18:01:49	4.12	0
2008-08-02	18:16:49	4.12	0
2008-08-02	18:31:49	4.12	0
2008-08-02	18:46:49	4.12	0
2008-08-02	19:01:49	4.71	0
2008-08-02	19:16:49	6.47	0
2008-08-02	19:31:49	9.41	0
2008-08-02	19:46:49	11.76	0
2008-08-02	20:01:49	16.47	0
2008-08-02	20:16:49	21.18	0
2008-08-02	20:31:49	25.29	0
2008-08-02	20:46:49	25.29	0
2008-08-02	21:01:49	31.76	0
2008-08-02	21:16:49	34.71	0
2008-08-02	21:31:49	43.53	0
2008-08-02	21:46:49	48.82	0
2008-08-02	22:01:49	92.35	0
2008-08-02	22:16:49	74.12	0
2008-08-02	22:31:49	70.59	0
2008-08-02	22:46:49	71.76	0
2008-08-02	23:01:49	87.65	0
2008-08-02	23:16:49	78.24	0
2008-08-02	23:31:49	94.12	0
2008-08-02	23:46:49	93.53	0
2008-08-03	00:01:49	100	0
2008-08-03	00:16:49	88.24	0
2008-08-03	00:31:49	85.29	0
2008-08-03	00:46:49	88.82	0
2008-08-03	01:01:49	98.24	0
2008-08-03	01:16:49	82.35	0
2008-08-03	01:31:49	83.53	0
2008-08-03	01:46:49	82.94	0
2008-08-03	02:01:49	81.76	0
2008-08-03	02:16:49	80	0
2008-08-03	02:31:49	79.41	0
2008-08-03	02:46:49	87.65	0
2008-08-03	03:01:49	79.41	0
2008-08-03	03:16:49	84.71	0
2008-08-03	03:31:49	82.94	0
2008-08-03	03:46:49	94.71	0
2008-08-03	04:01:49	93.53	0
2008-08-03	04:16:49	92.94	0
2008-08-03	04:31:49	90.59	0
2008-08-03	04:46:49	92.35	0
2008-08-03	05:01:49	94.71	0
2008-08-03	05:16:49	90.59	0
2008-08-03	05:31:49	87.65	0
2008-08-03	05:46:49	85.29	0
2008-08-03	06:01:49	80.59	0
2008-08-03	06:16:49	78.24	0
2008-08-03	06:31:49	77.65	0
2008-08-03	06:46:49	77.65	0
2008-08-03	07:01:49	84.71	0
2008-08-03	07:16:49	88.24	0
2008-08-03	07:31:49	83.53	0
2008-08-03	07:46:49	76.47	0
2008-08-03	08:01:49	75.88	0
2008-08-03	08:16:49	75.88	0
2008-08-03	08:31:49	95.29	0
2008-08-03	08:46:49	100	0
2008-08-03	09:01:49	8.24	0
2008-08-03	09:16:49	5.29	0
2008-08-03	09:31:49	5.29	0
2008-08-03	09:46:49	5.29	0
2008-08-03	10:01:49	5.29	0
2008-08-03	10:16:49	4.71	0
2008-08-03	10:31:49	4.71	0
2008-08-03	10:46:49	4.71	0
2008-08-03	11:01:49	4.71	0
2008-08-03	11:16:49	4.71	0
2008-08-03	11:31:49	4.71	0
2008-08-03	11:46:49	4.71	0
2008-08-03	12:01:49	4.71	0
2008-08-03	12:16:49	4.71	0
2008-08-03	12:31:49	4.71	0
2008-08-03	12:46:49	4.71	0
2008-08-03	13:01:49	4.12	0
2008-08-03	13:16:49	4.71	0
2008-08-03	13:31:49	4.71	0
2008-08-03	13:46:49	4.71	0
2008-08-03	14:01:49	4.71	0
2008-08-03	14:16:49	4.71	0
2008-08-03	14:31:49	4.71	0
2008-08-03	14:46:49	4.12	0
2008-08-03	15:01:49	13.53	0
2008-08-03	15:16:49	5.29	0
2008-08-03	15:31:49	5.29	0
2008-08-03	15:46:49	5.88	0
2008-08-03	16:01:49	7.06	0
2008-08-03	16:16:49	18.82	0
2008-08-03	16:31:49	8.24	0
2008-08-03	16:46:49	8.24	0
2008-08-03	17:01:49	8.24	0
2008-08-03	17:16:49	10	0
2008-08-03	17:31:49	10	0
2008-08-03	17:46:49	9.41	0
2008-08-03	18:01:49	10.59	0
2008-08-03	18:16:49	10	0
2008-08-03	18:31:49	11.76	0
2008-08-03	18:46:49	12.94	0
2008-08-03	19:01:49	8.82	0
2008-08-03	19:16:49	7.06	0
2008-08-03	19:31:49	7.65	0
2008-08-03	19:46:49	14.71	0
2008-08-03	20:01:49	23.53	0
2008-08-03	20:16:49	35.88	0
2008-08-03	20:31:49	51.76	0
2008-08-03	20:46:49	61.76	0
2008-08-03	21:01:49	59.41	0
2008-08-03	21:16:49	50.59	0
2008-08-03	21:31:49	48.82	0
2008-08-03	21:46:49	45.88	0
2008-08-03	22:01:49	44.12	0
2008-08-03	22:16:49	43.53	0
2008-08-03	22:31:49	43.53	0
2008-08-03	22:46:49	45.29	0
2008-08-03	23:01:49	47.06	0
2008-08-03	23:16:49	47.06	0
2008-08-03	23:31:49	47.06	0
2008-08-03	23:46:49	50	0
2008-08-04	00:01:49	47.06	0
2008-08-04	00:16:49	47.65	0
2008-08-04	00:31:49	48.24	0
2008-08-04	00:46:49	49.41	0
2008-08-04	01:01:49	50.59	0
2008-08-04	01:16:49	51.18	0
2008-08-04	01:31:49	55.29	0
2008-08-04	01:46:49	60	0
2008-08-04	02:01:49	65.88	0
2008-08-04	02:16:49	81.76	0
2008-08-04	02:31:49	93.53	0
2008-08-04	02:46:49	100	0
2008-08-04	03:01:49	98.82	0
2008-08-04	03:16:49	93.53	0
2008-08-04	03:31:49	100	0
2008-08-04	03:46:49	93.53	0
2008-08-04	04:01:49	100	0
2008-08-04	04:16:49	100	0
2008-08-04	04:31:49	100	0
2008-08-04	04:46:49	100	0
2008-08-04	05:01:49	100	0
2008-08-04	05:16:49	100	0
2008-08-04	05:31:49	100	0
2008-08-04	05:46:49	100	0
2008-08-04	06:01:49	100	0
2008-08-04	06:16:49	100	0
2008-08-04	06:31:49	100	0
2008-08-04	06:46:49	100	0
2008-08-04	07:01:49	100	0
2008-08-04	07:16:49	100	0
2008-08-04	07:31:49	100	0
2008-08-04	07:46:49	100	0
2008-08-04	08:01:49	100	0
2008-08-04	08:16:49	85.29	0
2008-08-04	08:31:49	64.71	0
2008-08-04	08:46:49	51.76	0
2008-08-04	09:01:49	40.59	0
2008-08-04	09:16:49	28.24	0
2008-08-04	09:31:49	25.88	0
2008-08-04	09:46:49	17.65	0
2008-08-04	10:01:49	14.12	0
2008-08-04	10:16:49	10.59	0
2008-08-04	10:31:49	8.24	0
2008-08-04	10:46:49	6.47	0
2008-08-04	11:01:49	6.47	0
2008-08-04	11:16:49	6.47	0
2008-08-04	11:31:49	5.88	0
2008-08-04	11:46:49	5.88	0
2008-08-04	12:01:49	5.88	0
2008-08-04	12:16:49	5.29	0
2008-08-04	12:31:49	5.29	0
2008-08-04	12:46:49	5.88	0
2008-08-04	13:01:49	5.29	0
2008-08-04	13:16:49	5.29	0
2008-08-04	13:31:49	5.29	0
2008-08-04	13:46:49	5.29	0
2008-08-04	14:01:49	5.29	0
2008-08-04	14:16:49	5.88	0
2008-08-04	14:31:49	5.29	0
2008-08-04	14:46:49	5.29	0
2008-08-04	15:01:49	4.71	0
2008-08-04	15:16:49	5.29	0
2008-08-04	15:31:49	5.29	0
2008-08-04	15:46:49	5.29	0
2008-08-04	16:01:49	5.29	0
2008-08-04	16:16:49	4.71	0
2008-08-04	16:31:49	4.71	0
2008-08-04	16:46:49	4.71	0
2008-08-04	17:01:49	4.71	0
2008-08-04	17:16:49	4.71	0
2008-08-04	17:31:49	4.71	0
2008-08-04	17:46:49	4.71	0
2008-08-04	18:01:49	4.71	0
2008-08-04	18:16:49	4.71	0
2008-08-04	18:31:49	4.12	0
2008-08-04	18:46:49	4.12	0
2008-08-04	19:01:49	4.12	0
2008-08-04	19:16:49	4.71	0
2008-08-04	19:31:49	4.71	0
2008-08-04	19:46:49	4.71	0
2008-08-04	20:01:49	4.12	0
2008-08-04	20:16:49	4.71	0
2008-08-04	20:31:49	7.06	0
2008-08-04	20:46:49	11.76	0
2008-08-04	21:01:49	14.71	0
2008-08-04	21:16:49	17.65	0
2008-08-04	21:31:49	24.71	0
2008-08-04	21:46:49	32.94	0
2008-08-04	22:01:49	40.59	0
2008-08-04	22:16:49	53.53	0
2008-08-04	22:31:49	74.71	0
2008-08-04	22:46:49	80	0
2008-08-04	23:01:49	81.76	0
2008-08-04	23:16:49	87.06	0
2008-08-04	23:31:49	91.18	0
2008-08-04	23:46:49	91.76	0
2008-08-05	00:01:49	93.53	0
2008-08-05	00:16:49	98.24	0
2008-08-05	00:31:49	100	0
2008-08-05	00:46:49	100	0
2008-08-05	01:01:49	100	0
2008-08-05	01:16:49	100	0
2008-08-05	01:31:49	100	0
2008-08-05	01:46:49	100	0
2008-08-05	02:01:49	100	0
2008-08-05	02:16:49	100	0
2008-08-05	02:31:49	100	0
2008-08-05	02:46:49	100	0
2008-08-05	03:01:49	100	0
2008-08-05	03:16:49	100	0
2008-08-05	03:31:49	100	0
2008-08-05	03:46:49	100	0
2008-08-05	04:01:49	100	0
2008-08-05	04:16:49	100	0
2008-08-05	04:31:49	100	0
2008-08-05	04:46:49	100	0
2008-08-05	05:01:49	100	0
2008-08-05	05:16:49	100	0
2008-08-05	05:31:49	100	0
2008-08-05	05:46:49	100	0
2008-08-05	06:01:49	100	0
2008-08-05	06:16:49	100	0
2008-08-05	06:31:49	100	0
2008-08-05	06:46:49	100	0
2008-08-05	07:01:49	100	0
2008-08-05	07:16:49	100	0
2008-10-14	12:16:14	7.06	1
2008-10-14	12:31:14	7.06	1
2008-10-14	12:46:14	7.06	1
2008-10-14	13:01:14	6.47	1
2008-10-14	13:16:14	6.47	1
2008-10-14	13:31:14	5.88	1
2008-10-14	13:46:14	5.88	1
2008-10-14	14:01:14	5.88	1
2008-10-14	14:16:14	5.88	1
2008-10-14	14:31:14	5.29	1
2008-10-14	14:46:14	5.29	1
2008-10-14	15:01:14	5.88	1
2008-10-14	15:16:14	5.29	1
2008-10-14	15:31:14	5.29	1
2008-10-14	15:46:14	4.71	1
2008-10-14	16:01:14	4.71	1
2008-10-14	16:16:14	4.71	1
2008-10-14	16:31:14	4.71	1
2008-10-14	16:46:14	4.71	1
2008-10-14	17:01:14	4.71	1
2008-10-14	17:16:14	4.71	1
2008-10-14	17:31:14	4.71	1
2008-10-14	17:46:14	4.71	1
2008-10-14	18:01:14	5.29	1
2008-10-14	18:16:14	8.24	1
2008-10-14	18:31:14	16.47	1
2008-10-14	18:46:14	18.82	1
2008-10-14	19:01:14	20	1
2008-10-14	19:16:14	24.71	1
2008-10-14	19:31:14	27.06	1
2008-10-14	19:46:14	27.65	1
2008-10-14	20:01:14	28.82	1
2008-10-14	20:16:14	28.82	1
2008-10-14	20:31:14	39.41	1
2008-10-14	20:46:14	40.59	1
2008-10-14	21:01:14	37.06	1
2008-10-14	21:16:14	34.12	1
2008-10-14	21:31:14	34.71	1
2008-10-14	21:46:14	34.12	1
2008-10-14	22:01:14	55.88	1
2008-10-14	22:16:14	75.29	1
2008-10-14	22:31:14	79.41	1
2008-10-14	22:46:14	84.71	1
2008-10-14	23:01:14	84.71	1
2008-10-14	23:16:14	85.88	1
2008-10-14	23:31:14	93.53	1
2008-10-14	23:46:14	100	1
2008-10-15	00:01:14	100	1
2008-10-15	00:16:14	100	1
2008-10-15	00:31:14	100	1
2008-10-15	00:46:14	100	1
2008-10-15	01:01:14	100	1
2008-10-15	01:16:14	100	1
2008-10-15	01:31:14	100	1
2008-10-15	01:46:14	100	1
2008-10-15	02:01:14	100	1
2008-10-15	02:16:14	100	1
2008-10-15	02:31:14	100	1
2008-10-15	02:46:14	100	1
2008-10-15	03:01:14	100	1
2008-10-15	03:16:14	100	1
2008-10-15	03:31:14	100	1
2008-10-15	03:46:14	100	1
2008-10-15	04:01:14	100	1
2008-10-15	04:16:14	100	1
2008-10-15	04:31:14	100	1
2008-10-15	04:46:14	100	1
2008-10-15	05:01:14	100	1
2008-10-15	05:16:14	100	1
2008-10-15	05:31:14	100	1
2008-10-15	05:46:14	100	1
2008-10-15	06:01:14	100	1
2008-10-15	06:16:14	100	1
2008-10-15	06:31:14	100	1
2008-10-15	06:46:14	100	1
2008-10-15	07:01:14	100	1
2008-10-15	07:16:14	100	1
2008-10-15	07:31:14	100	1
2008-10-15	07:46:14	62.35	1
2008-10-15	08:01:14	100	1
2008-10-15	08:16:14	100	1
2008-10-15	08:31:14	100	1
2008-10-15	08:46:14	100	1
2008-10-15	09:01:14	100	1
2008-10-15	09:16:14	100	1
2008-10-15	09:31:14	100	1
2008-10-15	09:46:14	100	1
2008-10-15	10:01:14	63.53	1
2008-10-15	10:16:14	100	1
2008-10-15	10:31:14	100	1
2008-10-15	10:46:14	45.29	1
2008-10-15	11:01:14	17.65	1
2008-10-15	11:16:14	14.12	1
2008-10-15	11:31:14	14.12	1
2008-10-15	11:46:14	10	1
2008-10-15	12:01:14	8.24	1
2008-10-15	12:16:14	8.82	1
2008-10-15	12:31:14	7.06	1
2008-10-15	12:46:14	6.47	1
2008-10-15	13:01:14	6.47	1
2008-10-15	13:16:14	6.47	1
2008-10-15	13:31:14	6.47	1
2008-10-15	13:46:14	5.88	1
2008-10-15	14:01:14	5.88	1
2008-10-15	14:16:14	5.88	1
2008-10-15	14:31:14	5.88	1
2008-10-15	14:46:14	5.88	1
2008-10-15	15:01:14	5.88	1
2008-10-15	15:16:14	5.88	1
2008-10-15	15:31:14	5.88	1
2008-10-15	15:46:14	5.29	1
2008-10-15	16:01:14	5.29	1
2008-10-15	16:16:14	5.88	1
2008-10-15	16:31:14	5.29	1
2008-10-15	16:46:14	5.29	1
2008-10-15	17:01:14	5.29	1
2008-10-15	17:16:14	5.29	1
2008-10-15	17:31:14	5.29	1
2008-10-15	17:46:14	5.88	1
2008-10-15	18:01:14	6.47	1
2008-10-15	18:16:14	8.24	1
2008-10-15	18:31:14	13.53	1
2008-10-15	18:46:14	14.71	1
2008-10-15	19:01:14	17.06	1
2008-10-15	19:16:14	15.88	1
2008-10-15	19:31:14	15.29	1
2008-10-15	19:46:14	14.71	1
2008-10-15	20:01:14	15.29	1
2008-10-15	20:16:14	14.71	1
2008-10-15	20:31:14	14.71	1
2008-10-15	20:46:14	15.29	1
2008-10-15	21:01:14	18.82	1
2008-10-15	21:16:14	27.06	1
2008-10-15	21:31:14	28.24	1
2008-10-15	21:46:14	37.06	1
2008-10-15	22:01:14	51.76	1
2008-10-15	22:16:14	74.12	1
2008-10-15	22:31:14	79.41	1
2008-10-15	22:46:14	100	1
2008-10-15	23:01:14	100	1
2008-10-15	23:16:14	100	1
2008-10-15	23:31:14	100	1
2008-10-15	23:46:14	100	1
2008-10-16	00:01:14	100	1
2008-10-16	00:16:14	100	1
2008-10-16	00:31:14	100	1
2008-10-16	00:46:14	100	1
2008-10-16	01:01:14	100	1
2008-10-16	01:16:14	100	1
2008-10-16	01:31:14	100	1
2008-10-16	01:46:14	100	1
2008-10-16	02:01:14	100	1
2008-10-16	02:16:14	100	1
2008-10-16	02:31:14	100	1
2008-10-16	02:46:14	100	1
2008-10-16	03:01:14	100	1
2008-10-16	03:16:14	100	1
2008-10-16	03:31:14	100	1
2008-10-16	03:46:14	100	1
2008-10-16	04:01:14	100	1
2008-10-16	04:16:14	100	1
2008-10-16	04:31:14	100	1
2008-10-16	04:46:14	100	1
2008-10-16	05:01:14	100	1
2008-10-16	05:16:14	100	1
2008-10-16	05:31:14	100	1
2008-10-16	05:46:14	100	1
2008-10-16	06:01:14	100	1
2008-10-16	06:16:14	100	1
2008-10-16	06:31:14	100	1
2008-10-16	06:46:14	100	1
2008-10-16	07:01:14	100	1
2008-10-16	07:16:14	100	1
2008-10-16	07:31:14	100	1
2008-10-16	07:46:14	94.71	1
2008-10-16	08:01:14	71.18	1
2008-10-16	08:16:14	62.35	1
2008-10-16	08:31:14	60	1
2008-10-16	08:46:14	48.24	1
2008-10-16	09:01:14	39.41	1
2008-10-16	09:16:14	36.47	1
2008-10-16	09:31:14	34.12	1
2008-10-16	09:46:14	30.59	1
2008-10-16	10:01:14	25.29	1
2008-10-16	10:16:14	22.35	1
2008-10-16	10:31:14	17.65	1
2008-10-16	10:46:14	16.47	1
2008-10-16	11:01:14	14.12	1
2008-10-16	11:16:14	10.59	1
2008-10-16	11:31:14	7.06	1
2008-10-16	11:46:14	6.47	1
2008-10-16	12:01:14	5.88	1
2008-10-16	12:16:14	5.29	1
2008-10-16	12:31:14	5.88	1
2008-10-16	12:46:14	5.88	1
2008-10-16	13:01:14	5.88	1
2008-10-16	13:16:14	6.47	1
2008-10-16	13:31:14	5.88	1
2008-10-16	13:46:14	5.88	1
2008-10-16	14:01:14	5.88	1
2008-10-16	14:16:14	5.88	1
2008-10-16	14:31:14	5.88	1
2008-10-16	14:46:14	5.29	1
2008-10-16	15:01:14	5.29	1
2008-10-16	15:16:14	4.71	1
2008-10-16	15:31:14	4.71	1
2008-10-16	15:46:14	4.71	1
2008-10-16	16:01:14	4.71	1
2008-10-16	16:16:14	4.71	1
2008-10-16	16:31:14	4.12	1
2008-10-16	16:46:14	4.12	1
2008-10-16	17:01:14	4.12	1
2008-10-16	17:16:14	4.12	1
2008-10-16	17:31:14	4.12	1
2008-10-16	17:46:14	4.12	1
2008-10-16	18:01:14	3.53	1
2008-10-16	18:16:14	3.53	1
2008-10-16	18:31:14	4.12	1
2008-10-16	18:46:14	4.71	1
2008-10-16	19:01:14	4.71	1
2008-10-16	19:16:14	14.12	1
2008-10-16	19:31:14	19.41	1
2008-10-16	19:46:14	20.59	1
2008-10-16	20:01:14	27.65	1
2008-10-16	20:16:14	27.06	1
2008-10-16	20:31:14	25.88	1
2008-10-16	20:46:14	22.35	1
2008-10-16	21:01:14	22.94	1
2008-10-16	21:16:14	21.76	1
2008-10-16	21:31:14	24.71	1
2008-10-16	21:46:14	29.41	1
2008-10-16	22:01:14	72.94	1
2008-10-16	22:16:14	70	1
2008-10-16	22:31:14	46.47	1
2008-10-16	22:46:14	33.53	1
2008-10-16	23:01:14	29.41	1
2008-10-16	23:16:14	33.53	1
2008-10-16	23:31:14	40	1
2008-10-16	23:46:14	20.59	1
2008-10-17	00:01:14	15.88	1
2008-10-17	00:16:14	8.24	1
2008-10-17	00:31:14	8.24	1
2008-10-17	00:46:14	8.82	1
2008-10-17	01:01:14	7.06	1
2008-10-17	01:16:14	6.47	1
2008-10-17	01:31:14	5.29	1
2008-10-17	01:46:14	4.71	1
2008-10-17	02:01:14	4.12	1
2008-10-17	02:16:14	4.12	1
2008-10-17	02:31:14	3.53	1
2008-10-17	02:46:14	3.53	1
2008-10-17	03:01:14	3.53	1
2008-10-17	03:16:14	3.53	1
2008-10-17	03:31:14	3.53	1
2008-10-17	03:46:14	3.53	1
2008-10-17	04:01:14	3.53	1
2008-10-17	04:16:14	3.53	1
2008-10-17	04:31:14	2.94	1
2008-10-17	04:46:14	3.53	1
2008-10-17	05:01:14	2.94	1
2008-10-17	05:16:14	2.94	1
2008-10-17	05:31:14	2.94	1
2008-10-17	05:46:14	2.94	1
2008-10-17	06:01:14	2.94	1
2008-10-17	06:16:14	2.94	1
2008-10-17	06:31:14	2.94	1
2008-10-17	06:46:14	3.53	1
2008-10-17	07:01:14	2.94	1
2008-10-17	07:16:14	3.53	1
2008-10-17	07:31:14	3.53	1
2008-10-17	07:46:14	3.53	1
2008-10-17	08:01:14	3.53	1
2008-10-17	08:16:14	3.53	1
2008-10-17	08:31:14	3.53	1
2008-10-17	08:46:14	3.53	1
2008-10-17	09:01:14	3.53	1
2008-10-17	09:16:14	4.12	1
2008-10-17	09:31:14	3.53	1
2008-10-17	09:46:14	3.53	1
2008-10-17	10:01:14	3.53	1
2008-10-17	10:16:14	4.12	1
2008-10-17	10:31:14	4.12	1
2008-10-17	10:46:14	4.12	1
2008-10-17	11:01:14	4.12	1
2008-10-17	11:16:14	4.12	1
2008-10-17	11:31:14	4.71	1
2008-10-17	11:46:14	4.71	1
2008-10-17	12:01:14	4.71	1
2008-10-17	12:16:14	4.71	1
2008-10-17	12:31:14	4.71	1
2008-10-17	12:46:14	5.29	1
2008-10-17	13:01:14	5.29	1
2008-10-17	13:16:14	5.29	1
2008-10-17	13:31:14	5.29	1
2008-10-17	13:46:14	5.29	1
2008-10-17	14:01:14	4.71	1
2008-10-17	14:16:14	4.71	1
2008-10-17	14:31:14	4.71	1
2008-10-17	14:46:14	4.71	1
2008-10-17	15:01:14	4.71	1
2008-10-17	15:16:14	4.71	1
2008-10-17	15:31:14	4.71	1
2008-10-17	15:46:14	4.71	1
2008-10-17	16:01:14	4.71	1
2008-10-17	16:16:14	4.12	1
2008-10-17	16:31:14	4.12	1
2008-10-17	16:46:14	4.12	1
2008-10-17	17:01:14	3.53	1
2008-10-17	17:16:14	4.12	1
2008-10-17	17:31:14	4.12	1
2008-10-17	17:46:14	4.12	1
2008-10-17	18:01:14	7.06	1
2008-10-17	18:16:14	22.35	1
2008-10-17	18:31:14	28.82	1
2008-10-17	18:46:14	31.76	1
2008-10-17	19:01:14	34.12	1
2008-10-17	19:16:14	35.88	1
2008-10-17	19:31:14	37.06	1
2008-10-17	19:46:14	37.65	1
2008-10-17	20:01:14	37.06	1
2008-10-17	20:16:14	38.82	1
2008-10-17	20:31:14	40.59	1
2008-10-17	20:46:14	41.76	1
2008-10-17	21:01:14	45.29	1
2008-10-17	21:16:14	51.76	1
2008-10-17	21:31:14	53.53	1
2008-10-17	21:46:14	59.41	1
2008-10-17	22:01:14	59.41	1
2008-10-17	22:16:14	59.41	1
2008-10-17	22:31:14	62.94	1
2008-10-17	22:46:14	70	1
2008-10-17	23:01:14	81.76	1
2008-10-17	23:16:14	88.24	1
2008-10-17	23:31:14	95.88	1
2008-10-17	23:46:14	100	1
2008-10-18	00:01:14	100	1
2008-10-18	00:16:14	100	1
2008-10-18	00:31:14	100	1
2008-10-18	00:46:14	100	1
2008-10-18	01:01:14	100	1
2008-10-18	01:16:14	100	1
2008-10-18	01:31:14	100	1
2008-10-18	01:46:14	100	1
2008-10-18	02:01:14	100	1
2008-10-18	02:16:14	100	1
2008-10-18	02:31:14	100	1
2008-10-18	02:46:14	100	1
2008-10-18	03:01:14	100	1
2008-10-18	03:16:14	100	1
2008-10-18	03:31:14	100	1
2008-10-18	03:46:14	100	1
2008-10-18	04:01:14	100	1
2008-10-18	04:16:14	100	1
2008-10-18	04:31:14	100	1
2008-10-18	04:46:14	100	1
2008-10-18	05:01:14	100	1
2008-10-18	05:16:14	100	1
2008-10-18	05:31:14	100	1
2008-10-18	05:46:14	100	1
2008-10-18	06:01:14	100	1
2008-10-18	06:16:14	100	1
2008-10-18	06:31:14	100	1
2008-10-18	06:46:14	100	1
2008-10-18	07:01:14	100	1
2008-10-18	07:16:14	100	1
2008-10-18	07:31:14	100	1
2008-10-18	07:46:14	100	1
2008-10-18	08:01:14	100	1
2008-10-18	08:16:14	100	1
2008-10-18	08:31:14	100	1
2008-10-18	08:46:14	98.24	1
2008-10-18	09:01:14	96.47	1
2008-10-18	09:16:14	94.71	1
2008-10-18	09:31:14	90.59	1
2008-10-18	09:46:14	88.82	1
2008-10-18	10:01:14	86.47	1
2008-10-18	10:16:14	84.71	1
2008-10-18	10:31:14	81.76	1
2008-10-18	10:46:14	78.24	1
2008-10-18	11:01:14	67.06	1
2008-10-18	11:16:14	50.59	1
2008-10-18	11:31:14	24.71	1
2008-10-18	11:46:14	14.12	1
2008-10-18	12:01:14	8.82	1
2008-10-18	12:16:14	8.82	1
2008-10-18	12:31:14	8.24	1
2008-10-18	12:46:14	7.06	1
2008-10-18	13:01:14	6.47	1
2008-10-18	13:16:14	6.47	1
2008-10-18	13:31:14	5.88	1
2008-10-18	13:46:14	5.88	1
2008-10-18	14:01:14	5.88	1
2008-10-18	14:16:14	5.88	1
2008-10-18	14:31:14	5.88	1
2008-10-18	14:46:14	5.29	1
2008-10-18	15:01:14	5.29	1
2008-10-18	15:16:14	5.29	1
2008-10-18	15:31:14	5.29	1
2008-10-18	15:46:14	5.29	1
2008-10-18	16:01:14	5.29	1
2008-10-18	16:16:14	5.29	1
2008-10-18	16:31:14	5.29	1
2008-10-18	16:46:14	18.24	1
2008-10-18	17:01:14	44.12	1
2008-10-18	17:16:14	77.65	1
2008-10-18	17:31:14	87.65	1
2008-10-18	17:46:14	90.59	1
2008-10-18	18:01:14	97.65	1
2008-10-18	18:16:14	100	1
2008-10-18	18:31:14	100	1
2008-10-18	18:46:14	100	1
2008-10-18	19:01:14	100	1
2008-10-18	19:16:14	100	1
2008-10-18	19:31:14	100	1
2008-10-18	19:46:14	100	1
2008-10-18	20:01:14	100	1
2008-10-18	20:16:14	100	1
2008-10-18	20:31:14	100	1
2008-10-18	20:46:14	100	1
2008-10-18	21:01:14	100	1
2008-10-18	21:16:14	100	1
2008-10-18	21:31:14	100	1
2008-10-18	21:46:14	100	1
2008-10-18	22:01:14	100	1
2008-10-18	22:16:14	100	1
2008-10-18	22:31:14	100	1
2008-10-18	22:46:14	100	1
2008-10-18	23:01:14	100	1
2008-10-18	23:16:14	100	1
2008-10-18	23:31:14	100	1
2008-10-18	23:46:14	100	1
2008-10-19	00:01:14	100	1
2008-10-19	00:16:14	100	1
2008-10-19	00:31:14	100	1
2008-10-19	00:46:14	100	1
2008-10-19	01:01:14	100	1
2008-10-19	01:16:14	100	1
2008-10-19	01:31:14	100	1
2008-10-19	01:46:14	100	1
2008-10-19	02:01:14	100	1
2008-10-19	02:16:14	100	1
2008-10-19	02:31:14	100	1
2008-10-19	02:46:14	100	1
2008-10-19	03:01:14	100	1
2008-10-19	03:16:14	100	1
2008-10-19	03:31:14	100	1
2008-10-19	03:46:14	100	1
2008-10-19	04:01:14	100	1
2008-10-19	04:16:14	100	1
2008-10-19	04:31:14	100	1
2008-10-19	04:46:14	100	1
2008-10-19	05:01:14	100	1
2008-10-19	05:16:14	100	1
2008-10-19	05:31:14	100	1
2008-10-19	05:46:14	100	1
2008-10-19	06:01:14	100	1
2008-10-19	06:16:14	100	1
2008-10-19	06:31:14	100	1
2008-10-19	06:46:14	100	1
2008-10-19	07:01:14	100	1
2008-10-19	07:16:14	100	1
2008-10-19	07:31:14	100	1
2008-10-19	07:46:14	100	1
2008-10-19	08:01:14	100	1
2008-10-19	08:16:14	100	1
2008-10-19	08:31:14	100	1
2008-10-19	08:46:14	100	1
2008-10-19	09:01:14	100	1
2008-10-19	09:16:14	98.24	1
2008-10-19	09:31:14	83.53	1
2008-10-19	09:46:14	67.65	1
2008-10-19	10:01:14	34.71	1
2008-10-19	10:16:14	44.71	1
2008-10-19	10:31:14	27.65	1
2008-10-19	10:46:14	13.53	1
2008-10-19	11:01:14	11.76	1
2008-10-19	11:16:14	10.59	1
2008-10-19	11:31:14	10.59	1
2008-10-19	11:46:14	9.41	1
2008-10-19	12:01:14	9.41	1
2008-10-19	12:16:14	8.24	1
2008-10-19	12:31:14	8.24	1
2008-10-19	12:46:14	8.82	1
2008-10-19	13:01:14	8.24	1
2008-10-19	13:16:14	10	1
2008-10-19	13:31:14	10	1
2008-10-19	13:46:14	8.82	1
2008-10-19	14:01:14	9.41	1
2008-10-19	14:16:14	8.82	1
2008-10-19	14:31:14	7.65	1
2008-10-19	14:46:14	8.24	1
2008-10-19	15:01:14	7.65	1
2008-10-19	15:16:14	7.65	1
2008-10-19	15:31:14	7.06	1
2008-10-19	15:46:14	5.88	1
2008-10-19	16:01:14	5.29	1
2008-10-19	16:16:14	5.29	1
2008-10-19	16:31:14	5.29	1
2008-10-19	16:46:14	4.71	1
2008-10-19	17:01:14	4.71	1
2008-10-19	17:16:14	4.71	1
2008-10-19	17:31:14	4.71	1
2008-10-19	17:46:14	4.71	1
2008-10-19	18:01:14	5.29	1
2008-10-19	18:16:14	6.47	1
2008-10-19	18:31:14	7.06	1
2008-10-19	18:46:14	7.06	1
2008-10-19	19:01:14	6.47	1
2008-10-19	19:16:14	7.06	1
2008-10-19	19:31:14	7.06	1
2008-10-19	19:46:14	7.06	1
2008-10-19	20:01:14	7.06	1
2008-10-19	20:16:14	7.65	1
2008-10-19	20:31:14	8.82	1
2008-10-19	20:46:14	8.82	1
2008-10-19	21:01:14	9.41	1
2008-10-19	21:16:14	10	1
2008-10-19	21:31:14	11.18	1
2008-10-19	21:46:14	10.59	1
2008-10-19	22:01:14	12.35	1
2008-10-19	22:16:14	15.88	1
2008-10-19	22:31:14	19.41	1
2008-10-19	22:46:14	23.53	1
2008-10-19	23:01:14	23.53	1
2008-10-19	23:16:14	17.65	1
2008-10-19	23:31:14	18.24	1
2008-10-19	23:46:14	19.41	1
2008-10-20	00:01:14	35.88	1
2008-10-20	00:16:14	24.71	1
2008-10-20	00:31:14	25.29	1
2008-10-20	00:46:14	22.35	1
2008-10-20	01:01:14	20.59	1
2008-10-20	01:16:14	21.76	1
2008-10-20	01:31:14	24.71	1
2008-10-20	01:46:14	28.82	1
2008-10-20	02:01:14	28.82	1
2008-10-20	02:16:14	30	1
2008-10-20	02:31:14	25.88	1
2008-10-20	02:46:14	25.29	1
2008-10-20	03:01:14	25.88	1
2008-10-20	03:16:14	28.82	1
2008-10-20	03:31:14	30.59	1
2008-10-20	03:46:14	33.53	1
2008-10-20	04:01:14	32.94	1
2008-10-20	04:16:14	32.35	1
2008-10-20	04:31:14	38.82	1
2008-10-20	04:46:14	30.59	1
2008-10-20	05:01:14	34.12	1
2008-10-20	05:16:14	35.88	1
2008-10-20	05:31:14	31.76	1
2008-10-20	05:46:14	41.18	1
2008-10-20	06:01:14	45.29	1
2008-10-20	06:16:14	34.12	1
2008-10-20	06:31:14	37.65	1
2008-10-20	06:46:14	62.94	1
2008-10-20	07:01:14	52.35	1
2008-10-20	07:16:14	41.18	1
2008-10-20	07:31:14	48.82	1
2008-10-20	07:46:14	40.59	1
2008-10-20	08:01:14	29.41	1
2008-10-20	08:16:14	25.29	1
2008-10-20	08:31:14	100	1
2008-10-20	08:46:14	81.18	1
2008-10-20	09:01:14	47.06	1
2008-10-20	09:16:14	100	1
2008-10-20	09:31:14	100	1
2008-10-20	09:46:14	100	1
2008-10-20	10:01:14	100	1
2008-10-20	10:16:14	100	1
2008-10-20	10:31:14	38.82	1
2008-10-20	10:46:14	15.88	1
2008-10-20	11:01:14	11.76	1
2008-10-20	11:16:14	12.94	1
2008-10-20	11:31:14	10	1
2008-10-20	11:46:14	10	1
2008-10-20	12:01:14	10	1
2008-10-20	12:16:14	7.65	1
2008-10-20	12:31:14	6.47	1
2008-10-20	12:46:14	6.47	1
2008-10-20	13:01:14	5.88	1
2008-10-20	13:16:14	4.71	1
2008-10-20	13:31:14	4.71	1
2008-10-20	13:46:14	5.29	1
2008-10-20	14:01:14	5.29	1
2008-10-20	14:16:14	4.71	1
2008-10-20	14:31:14	4.71	1
2008-10-20	14:46:14	4.71	1
2008-10-20	15:01:14	4.71	1
2008-10-20	15:16:14	4.71	1
2008-10-20	15:31:14	4.71	1
2008-10-20	15:46:14	4.71	1
2008-10-20	16:01:14	4.12	1
2008-10-20	16:16:14	4.71	1
2008-10-20	16:31:14	4.12	1
2008-10-20	16:46:14	4.12	1
2008-10-20	17:01:14	4.12	1
2008-10-20	17:16:14	4.12	1
2008-10-20	17:31:14	4.12	1
2008-10-20	17:46:14	4.71	1
2008-10-20	18:01:14	5.88	1
2008-10-20	18:16:14	7.06	1
2008-10-20	18:31:14	10.59	1
2008-10-20	18:46:14	11.18	1
2008-10-20	19:01:14	11.76	1
2008-10-20	19:16:14	13.53	1
2008-10-20	19:31:14	11.76	1
2008-10-20	19:46:14	11.76	1
2008-10-20	20:01:14	11.76	1
2008-10-20	20:16:14	11.76	1
2008-10-20	20:31:14	10.59	1
2008-10-20	20:46:14	10.59	1
2008-10-20	21:01:14	11.18	1
2008-10-20	21:16:14	11.18	1
2008-10-20	21:31:14	11.18	1
2008-10-20	21:46:14	11.18	1
2008-10-20	22:01:14	11.18	1
2008-10-20	22:16:14	10.59	1
2008-10-20	22:31:14	10	1
2008-10-20	22:46:14	10	1
2008-10-20	23:01:14	9.41	1
2008-10-20	23:16:14	9.41	1
2008-10-20	23:31:14	8.82	1
2008-10-20	23:46:14	8.82	1
2008-10-21	00:01:14	10	1
2008-10-21	00:16:14	10.59	1
2008-10-21	00:31:14	10.59	1
2008-10-21	00:46:14	11.76	1
2008-10-21	01:01:14	34.12	1
2008-10-21	01:16:14	100	1
2008-10-21	01:31:14	100	1
2008-10-21	01:46:14	100	1
2008-10-21	02:01:14	100	1
2008-10-21	02:16:14	100	1
2008-10-21	02:31:14	95.88	1
2008-10-21	02:46:14	86.47	1
2008-10-21	03:01:14	93.53	1
2008-10-21	03:16:14	90.59	1
2008-10-21	03:31:14	98.24	1
2008-10-21	03:46:14	100	1
2008-10-21	04:01:14	100	1
2008-10-21	04:16:14	100	1
2008-10-21	04:31:14	100	1
2008-10-21	04:46:14	94.12	1
2008-10-21	05:01:14	100	1
2008-10-21	05:16:14	92.35	1
2008-10-21	05:31:14	95.29	1
2008-10-21	05:46:14	98.24	1
2008-10-21	06:01:14	94.12	1
2008-10-21	06:16:14	87.65	1
2008-10-21	06:31:14	79.41	1
2008-10-21	06:46:14	80.59	1
2008-10-21	07:01:14	100	1
2008-10-21	07:16:14	88.24	1
2008-10-21	07:31:14	91.18	1
2008-10-21	07:46:14	87.65	1
2008-10-21	08:01:14	84.71	1
2008-10-21	08:16:14	89.41	1
2008-10-21	08:31:14	81.76	1
2008-10-21	08:46:14	59.41	1
2008-10-21	09:01:14	57.65	1
2008-10-21	09:16:14	48.82	1
2008-10-21	09:31:14	38.24	1
2008-10-21	09:46:14	40	1
2008-10-21	10:01:14	33.53	1
2008-10-21	10:16:14	30.59	1
2008-10-21	10:31:14	26.47	1
2008-10-21	10:46:14	24.12	1
2008-10-21	11:01:14	21.18	1
2008-10-21	11:16:14	21.18	1
2008-10-21	11:31:14	100	1
2008-10-21	11:46:14	100	1
2008-10-21	12:01:14	100	1
2008-10-21	12:16:14	100	1
2008-10-21	12:31:14	44.12	1
2008-10-21	12:46:14	27.65	1
2008-10-21	13:01:14	10	1
2008-10-21	13:16:14	7.65	1
2008-10-21	13:31:14	7.06	1
2008-10-21	13:46:14	7.06	1
2008-10-21	14:01:14	5.29	1
2008-10-21	14:16:14	5.29	1
2008-10-21	14:31:14	4.71	1
2008-10-21	14:46:14	4.71	1
2008-10-21	15:01:14	4.71	1
2008-10-21	15:16:14	4.71	1
2008-10-21	15:31:14	4.71	1
2008-10-21	15:46:14	4.71	1
2008-10-21	16:01:14	4.12	1
2008-10-21	16:16:14	4.71	1
2008-10-21	16:31:14	4.12	1
2008-10-21	16:46:14	4.12	1
2008-10-21	17:01:14	4.71	1
2008-10-21	17:16:14	5.29	1
2008-10-21	17:31:14	4.12	1
2008-10-21	17:46:14	4.12	1
2008-10-21	18:01:14	5.29	1
2008-10-21	18:16:14	5.88	1
2008-10-21	18:31:14	7.65	1
2008-10-21	18:46:14	10.59	1
2008-10-21	19:01:14	14.12	1
2008-10-21	19:16:14	76.47	1
2008-10-21	19:31:14	81.18	1
2008-10-21	19:46:14	82.35	1
2008-10-21	20:01:14	85.29	1
2008-10-21	20:16:14	100	1
2008-10-21	20:31:14	100	1
2008-10-21	20:46:14	98.24	1
2008-10-21	21:01:14	100	1
2008-10-21	21:16:14	98.82	1
2008-10-21	21:31:14	100	1
2008-10-21	21:46:14	99.41	1
2008-10-21	22:01:14	93.53	1
2008-10-21	22:16:14	88.24	1
2008-10-21	22:31:14	85.88	1
2008-10-21	22:46:14	84.12	1
2008-10-21	23:01:14	66.47	1
2008-10-21	23:16:14	61.18	1
2008-10-21	23:31:14	60.59	1
2008-10-21	23:46:14	62.94	1
2008-10-22	00:01:14	78.24	1
2008-10-22	00:16:14	75.29	1
2008-10-22	00:31:14	72.35	1
2008-10-22	00:46:14	75.29	1
2008-10-22	01:01:14	78.82	1
2008-10-22	01:16:14	78.24	1
2008-10-22	01:31:14	72.94	1
2008-10-22	01:46:14	64.71	1
2008-10-22	02:01:14	71.76	1
2008-10-22	02:16:14	70.59	1
2008-10-22	02:31:14	70	1
2008-10-22	02:46:14	85.88	1
2008-10-22	03:01:14	100	1
2008-10-22	03:16:14	100	1
2008-10-22	03:31:14	100	1
2008-10-22	03:46:14	98.82	1
2008-10-22	04:01:14	88.82	1
2008-10-22	04:16:14	80	1
2008-10-22	04:31:14	100	1
2008-10-22	04:46:14	100	1
2008-10-22	05:01:14	88.24	1
2008-10-22	05:16:14	77.65	1
2008-10-22	05:31:14	83.53	1
2008-10-22	05:46:14	100	1
2008-10-22	06:01:14	100	1
2008-10-22	06:16:14	95.88	1
2008-10-22	06:31:14	98.24	1
2008-10-22	06:46:14	90	1
2008-10-22	07:01:14	78.82	1
2008-10-22	07:16:14	74.71	1
2008-10-22	07:31:14	74.12	1
2008-10-22	07:46:14	71.76	1
2008-10-22	08:01:14	34.12	1
2008-10-22	08:16:14	31.18	1
2008-10-22	08:31:14	20.59	1
2008-10-22	08:46:14	14.71	1
2008-10-22	09:01:14	14.12	1
2008-10-22	09:16:14	12.94	1
2008-10-22	09:31:14	9.41	1
2008-10-22	09:46:14	8.24	1
2008-10-22	10:01:14	6.47	1
2008-10-22	10:16:14	5.88	1
2008-10-22	10:31:14	5.88	1
2008-10-22	10:46:14	5.29	1
2008-10-22	11:01:14	5.29	1
2008-10-22	11:16:14	5.29	1
2008-10-22	11:31:14	5.29	1
2008-10-22	11:46:14	5.29	1
2008-10-22	12:01:14	5.29	1
2008-10-22	12:16:14	5.29	1
2008-10-22	12:31:14	4.71	1
2008-10-22	12:46:14	4.71	1
2008-10-22	13:01:14	5.29	1
2008-10-22	13:16:14	4.71	1
2008-10-22	13:31:14	4.71	1
2008-10-22	13:46:14	5.29	1
2008-10-22	14:01:14	4.12	1
2008-10-22	14:16:14	4.12	1
2008-10-22	14:31:14	4.12	1
2008-10-22	14:46:14	4.12	1
2008-10-22	15:01:14	4.12	1
2008-10-22	15:16:14	4.12	1
2008-10-22	15:31:14	4.12	1
2008-10-22	15:46:14	4.12	1
2008-10-22	16:01:14	4.12	1
2008-10-22	16:16:14	4.12	1
2008-10-22	16:31:14	4.12	1
2008-10-22	16:46:14	4.12	1
2008-10-22	17:01:14	4.12	1
2008-10-22	17:16:14	3.53	1
2008-10-22	17:31:14	3.53	1
2008-10-22	17:46:14	3.53	1
2008-10-22	18:01:14	3.53	1
2008-10-22	18:16:14	4.12	1
2008-10-22	18:31:14	5.29	1
2008-10-22	18:46:14	6.47	1
2008-10-22	19:01:14	9.41	1
2008-10-22	19:16:14	21.76	1
2008-10-22	19:31:14	72.94	1
2008-10-22	19:46:14	91.18	1
2008-10-22	20:01:14	75.29	1
2008-10-22	20:16:14	86.47	1
2008-10-22	20:31:14	71.76	1
2008-10-22	20:46:14	81.76	1
2008-10-22	21:01:14	80.59	1
2008-10-22	21:16:14	97.65	1
2008-10-22	21:31:14	99.41	1
2008-10-22	21:46:14	99.41	1
2008-10-22	22:01:14	98.24	1
2008-10-22	22:16:14	98.24	1
2008-10-22	22:31:14	99.41	1
2008-10-22	22:46:14	100	1
2008-10-22	23:01:14	100	1
2008-10-22	23:16:14	100	1
2008-10-22	23:31:14	100	1
2008-10-22	23:46:14	100	1
2008-10-23	00:01:14	100	1
2008-10-23	00:16:14	100	1
2008-10-23	00:31:14	100	1
2008-10-23	00:46:14	100	1
2008-10-23	01:01:14	100	1
2008-10-23	01:16:14	100	1
2008-10-23	01:31:14	100	1
2008-10-23	01:46:14	100	1
2008-10-23	02:01:14	100	1
2008-10-23	02:16:14	100	1
2008-10-23	02:31:14	100	1
2008-10-23	02:46:14	100	1
2008-10-23	03:01:14	100	1
2008-10-23	03:16:14	100	1
2008-10-23	03:31:14	100	1
2008-10-23	03:46:14	100	1
2008-10-23	04:01:14	100	1
2008-10-23	04:16:14	100	1
2008-10-23	04:31:14	100	1
2008-10-23	04:46:14	100	1
2008-10-23	05:01:14	100	1
2008-10-23	05:16:14	100	1
2008-10-23	05:31:14	100	1
2008-10-23	05:46:14	100	1
2008-10-23	06:01:14	100	1
2008-10-23	06:16:14	91.76	1
2008-10-23	06:31:14	92.35	1
2008-10-23	06:46:14	99.41	1
2008-10-23	07:01:14	91.76	1
2008-10-23	07:16:14	87.06	1
2008-10-23	07:31:14	81.18	1
2008-10-23	07:46:14	75.29	1
2008-10-23	08:01:14	68.82	1
2008-10-23	08:16:14	62.94	1
2008-10-23	08:31:14	51.76	1
2008-10-23	08:46:14	32.94	1
2008-10-23	09:01:14	24.71	1
2008-10-23	09:16:14	17.06	1
2008-10-23	09:31:14	13.53	1
2008-10-23	09:46:14	10	1
2008-10-23	10:01:14	7.06	1
2008-10-23	10:16:14	7.06	1
2008-10-23	10:31:14	5.88	1
2008-10-23	10:46:14	5.88	1
2008-10-23	11:01:14	5.29	1
2008-10-23	11:16:14	5.29	1
2008-10-23	11:31:14	4.71	1
2008-10-23	11:46:14	5.29	1
2008-10-23	12:01:14	5.29	1
2008-10-23	12:16:14	4.71	1
2008-10-23	12:31:14	4.71	1
2008-10-23	12:46:14	5.29	1
2008-10-23	13:01:14	5.29	1
2008-10-23	13:16:14	5.29	1
2008-10-23	13:31:14	4.71	1
2008-10-23	13:46:14	4.71	1
2008-10-23	14:01:14	4.71	1
2008-10-23	14:16:14	4.12	1
2008-10-23	14:31:14	4.12	1
2008-10-23	14:46:14	4.71	1
2008-10-23	15:01:14	4.71	1
2008-10-23	15:16:14	4.71	1
2008-10-23	15:31:14	4.71	1
2008-10-23	15:46:14	4.71	1
2008-10-23	16:01:14	4.71	1
2008-10-23	16:16:14	4.12	1
2008-10-23	16:31:14	4.12	1
2008-10-23	16:46:14	4.12	1
2008-10-23	17:01:14	4.12	1
2008-10-23	17:16:14	4.12	1
2008-10-23	17:31:14	4.12	1
2008-10-23	17:46:14	4.12	1
2008-10-23	18:01:14	4.12	1
2008-10-23	18:16:14	7.65	1
2008-10-23	18:31:14	18.24	1
2008-10-23	18:46:14	37.06	1
2008-10-23	19:01:14	35.29	1
2008-10-23	19:16:14	33.53	1
2008-10-23	19:31:14	61.76	1
2008-10-23	19:46:14	74.71	1
2008-10-23	20:01:14	78.24	1
2008-10-23	20:16:14	82.94	1
2008-10-23	20:31:14	95.29	1
2008-10-23	20:46:14	84.12	1
2008-10-23	21:01:14	82.94	1
2008-10-23	21:16:14	61.76	1
2008-10-23	21:31:14	62.35	1
2008-10-23	21:46:14	54.71	1
2008-10-23	22:01:14	55.29	1
2008-10-23	22:16:14	39.41	1
2008-10-23	22:31:14	54.12	1
2008-10-23	22:46:14	43.53	1
2008-10-23	23:01:14	37.06	1
2008-10-23	23:16:14	42.35	1
2008-10-23	23:31:14	52.35	1
2008-10-23	23:46:14	45.29	1
2008-10-24	00:01:14	43.53	1
2008-10-24	00:16:14	35.29	1
2008-10-24	00:31:14	38.82	1
2008-10-24	00:46:14	30	1
2008-10-24	01:01:14	50	1
2008-10-24	01:16:14	44.12	1
2008-10-24	01:31:14	38.82	1
2008-10-24	01:46:14	46.47	1
2008-10-24	02:01:14	50.59	1
2008-10-24	02:16:14	47.06	1
2008-10-24	02:31:14	51.18	1
2008-10-24	02:46:14	54.12	1
2008-10-24	03:01:14	57.65	1
2008-10-24	03:16:14	51.76	1
2008-10-24	03:31:14	51.76	1
2008-10-24	03:46:14	52.94	1
2008-10-24	04:01:14	55.88	1
2008-10-24	04:16:14	55.88	1
2008-10-24	04:31:14	55.88	1
2008-10-24	04:46:14	45.88	1
2008-10-24	05:01:14	37.06	1
2008-10-24	05:16:14	27.06	1
2008-10-24	05:31:14	29.41	1
2008-10-24	05:46:14	28.82	1
2008-10-24	06:01:14	25.88	1
2008-10-24	06:16:14	22.94	1
2008-10-24	06:31:14	22.35	1
2008-10-24	06:46:14	22.35	1
2008-10-24	07:01:14	25.88	1
2008-10-24	07:16:14	29.41	1
2008-10-24	07:31:14	23.53	1
2008-10-24	07:46:14	17.06	1
2008-10-24	08:01:14	18.24	1
2008-10-24	08:16:14	17.06	1
2008-10-24	08:31:14	12.35	1
2008-10-24	08:46:14	9.41	1
2008-10-24	09:01:14	7.06	1
2008-10-24	09:16:14	5.88	1
2008-10-24	09:31:14	5.29	1
2008-10-24	09:46:14	5.29	1
2008-10-24	10:01:14	4.71	1
2008-10-24	10:16:14	4.71	1
2008-10-24	10:31:14	4.71	1
2008-10-24	10:46:14	4.71	1
2008-10-24	11:01:14	4.71	1
2008-10-24	11:16:14	4.71	1
2008-10-24	11:31:14	4.71	1
2008-10-24	11:46:14	4.71	1
2008-10-24	12:01:14	4.71	1
2008-10-24	12:16:14	4.12	1
2008-10-24	12:31:14	4.71	1
2008-10-24	12:46:14	4.12	1
[truncated: 74 more rows]
